# Supplementary material for: Design and synthesis of new chiral phosphorus–olefin bidentate ligands and their use in the rhodium-catalyzed asymmetric addition of organoboroxines to N-sulfonyl imines
Source: Royal Society of Chemistry journal article supplement (doi:10.1039/c1cc11823d), 2011-01-01

## Design and Synthesis of New Chiral Phosphorus–Olefin Bidentate Ligands and Their Use in the Rhodium-Catalyzed Asymmetric Addition of Organoboroxines to *N*-Sulfonyl Imines

Ryo Shintani,\* Rintaro Narui, Yosuke Tsutsumi, Sayuri Hayashi, and Tamio Hayashi\*

Department of Chemistry, Graduate School of Science, Kyoto University,  
Sakyo, Kyoto 606-8502, Japan

### Supporting Information

#### I. General

All air- and moisture-sensitive manipulations were carried out with standard Schlenk techniques under nitrogen or in a glove box under argon.

THF and dioxane were purified by passing through neutral alumina columns under nitrogen. DMF was distilled over CaH<sub>2</sub> under vacuum. CH<sub>2</sub>Cl<sub>2</sub> was distilled over CaH<sub>2</sub> under nitrogen. Et<sub>3</sub>N was distilled over KOH under nitrogen. C<sub>6</sub>H<sub>6</sub> was distilled over benzophenone ketyl under nitrogen. Pentane was distilled over benzophenone ketyl in the presence of triglyme under nitrogen.

2-methyl-2-propenyl bromide (Aldrich), NaH (Kanto Chemical; 60 wt% in mineral oil), Grubbs catalyst (Aldrich; 2nd generation), trifluoroacetic acid (Wako Chemicals), chlorodiphenylphosphine (Wako Chemicals), and methanesulfonyl chloride (Wako Chemicals) were used as received.

(*S*)-**2**,<sup>1</sup> (*7R*)-**7**,<sup>2</sup> 2-(benzyloxymethyl)-2-propenol,<sup>3</sup> 2-phenyl-2-propenyl bromide,<sup>4</sup> Rh(acac)(C<sub>2</sub>H<sub>4</sub>)<sub>2</sub>,<sup>5</sup> and [RhCl(C<sub>2</sub>H<sub>4</sub>)<sub>2</sub>]<sub>2</sub><sup>6</sup> were synthesized following the literature procedures. Imines **5** and **8** were prepared from the corresponding aldehydes and sulfonamides following the literature procedure.<sup>7</sup> Organoboroxines were prepared by dehydration of the corresponding organoboronic acids following the literature procedure.<sup>8</sup>

All other chemicals and solvents were purchased from Aldrich, Wako Chemicals, TCI, or Kanto Chemical and used as received.

<sup>1</sup> Luly, J. R.; Dellaria, J. F.; Plattner, J. J.; Soderquist, J. L.; Yi, N. *J. Org. Chem.* **1987**, *52*, 1487.

<sup>2</sup> Shintani, R.; Duan, W.-L.; Nagano, T.; Okada, A.; Hayashi, T. *Angew. Chem., Int. Ed.* **2005**, *44*, 4611.

<sup>3</sup> Russo, F.; Wängsell, F.; Sävmarker, J.; Jacobsson, M.; Larhed, M. *Tetrahedron* **2009**, *65*, 10047.

<sup>4</sup> Miyamura, H.; Akiyama, R.; Ishida, T.; Matsubara, R.; Kobayashi, S. *Tetrahedron* **2005**, *61*, 12177.

<sup>5</sup> Cramer, R. *Inorg. Synth.* **1974**, *15*, 16.

<sup>6</sup> Cramer, R. *Inorg. Synth.* **1974**, *15*, 14.

<sup>7</sup> (a) Love, B. E.; Raje, P. S.; Williams II, T. C. *Synlett* **1994**, 493. (b) Brichacek, M.; Lee, D.; Njardarson, J. T. *Org. Lett.* **2008**, *10*, 5023. (c) Chemla, F.; Hebbe, V.; Normant, J.-F. *Synthesis* **2000**, 75.

<sup>8</sup> Chen, F.-X.; Kina, A.; Hayashi, T. *Org. Lett.* **2006**, *8*, 341.

## II. Synthesis of Ligands and Complexes

### (S)-1a

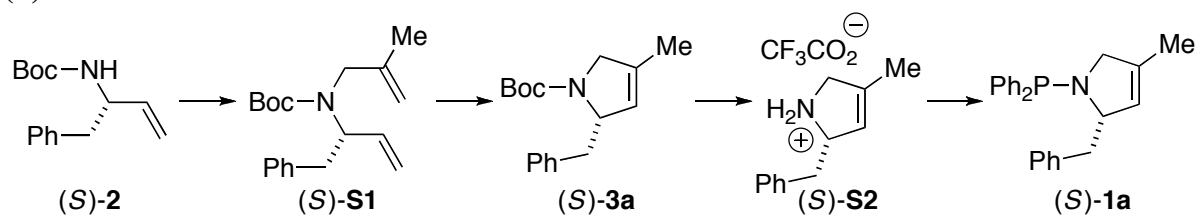

2-Methyl-2-propenyl bromide (726 mg, 5.38 mmol) and NaH (256 mg, 6.40 mmol; 60 wt% in mineral oil) were successively added to a solution of (S)-2 (1.01 g, 4.08 mmol) in DMF (9.0 mL) at 0 °C and the mixture was stirred for 1.5 h at room temperature. The reaction was quenched with H<sub>2</sub>O at 0 °C and this was extracted with EtOAc/hexane (1/10). The organic layer was dried over MgSO<sub>4</sub>, filtered, and concentrated under vacuum. The residue was chromatographed on silica gel with EtOAc/hexane = 1/20 to afford compound (S)-S1 as a colorless oil (1.17 g, 3.88 mmol; 95% yield). [ $\alpha$ ]<sub>D</sub><sup>25</sup> -55.4 (*c* 1.02, CHCl<sub>3</sub>).

<sup>1</sup>H NMR (CDCl<sub>3</sub>, 50 °C):  $\delta$  7.25 (t, <sup>3</sup>J<sub>HH</sub> = 7.5 Hz, 2H), 7.19-7.15 (m, 3H), 6.00 (ddd, <sup>3</sup>J<sub>HH</sub> = 17.0, 10.2, and 6.8 Hz, 1H), 5.06 (d, <sup>3</sup>J<sub>HH</sub> = 10.8 Hz, 1H), 5.04 (d, <sup>3</sup>J<sub>HH</sub> = 18.4 Hz, 1H), 4.77 (s, 1H), 4.73 (s, 1H), 4.34 (bs, 1H), 3.75-3.56 (m, 1H), 3.46 (d, <sup>2</sup>J<sub>HH</sub> = 16.3 Hz, 1H), 3.16-3.04 (m, 1H), 2.91 (dd, <sup>2</sup>J<sub>HH</sub> = 13.6 Hz and <sup>3</sup>J<sub>HH</sub> = 6.8 Hz, 1H), 1.60 (s, 3H), 1.42 (s, 9H). <sup>13</sup>C NMR (CDCl<sub>3</sub>, 50 °C):  $\delta$  155.4, 142.8, 139.0, 137.5, 129.5, 128.4, 126.4, 116.2, 111.6, 79.7, 61.5, 52.2, 39.2, 28.6, 20.1. HRMS (ESI-TOF) calcd for C<sub>19</sub>H<sub>27</sub>NO<sub>2</sub>Na (M+Na<sup>+</sup>) 324.1934, found 324.1930.

Grubbs catalyst (66.3 mg, 78.1  $\mu$ mol; 2nd generation) was added to a solution of (S)-S1 (1.16 g, 3.85 mmol) in C<sub>6</sub>H<sub>6</sub> (38 mL) and the mixture was stirred for 6 h at 60 °C. The solvent was removed under vacuum, and the residue was chromatographed on silica gel with EtOAc/hexane = 1/20 to afford compound (S)-3a as a colorless oil (1.03 g, 3.77 mmol; 98% yield, ~6/4 mixture of rotamers). [ $\alpha$ ]<sub>D</sub><sup>25</sup> +177 (*c* 1.10, CHCl<sub>3</sub>).

<sup>1</sup>H NMR (CDCl<sub>3</sub>):  $\delta$  7.28-7.22 (m, 2H), 7.22-7.17 (m, 1H), 7.15 (d, <sup>3</sup>J<sub>HH</sub> = 7.5 Hz, 0.8H), 7.12 (d, <sup>3</sup>J<sub>HH</sub> = 7.5 Hz, 1.2H), 5.26 (s, 0.4H), 5.23 (s, 0.6H), 4.73-4.67 (m, 0.4H), 4.61-4.55 (m, 0.6H), 4.02 (d, <sup>2</sup>J<sub>HH</sub> = 15.0 Hz, 0.6H), 3.89 (d, <sup>2</sup>J<sub>HH</sub> = 14.9 Hz, 0.4H), 3.70 (dd, <sup>2</sup>J<sub>HH</sub> = 14.9 Hz and <sup>4</sup>J<sub>HH</sub> = 4.0 Hz, 0.6H), 3.56 (dd, <sup>2</sup>J<sub>HH</sub> = 15.0 Hz and <sup>4</sup>J<sub>HH</sub> = 4.8 Hz, 0.4H), 3.17 (dd, <sup>2</sup>J<sub>HH</sub> = 12.9 Hz and <sup>3</sup>J<sub>HH</sub> = 3.4 Hz, 0.4H), 3.13 (dd, <sup>2</sup>J<sub>HH</sub> = 13.0 Hz and <sup>3</sup>J<sub>HH</sub> = 3.4 Hz, 0.6H), 2.84 (dd, <sup>2</sup>J<sub>HH</sub> = 13.0 Hz and <sup>3</sup>J<sub>HH</sub> = 8.2 Hz, 0.4H), 2.69 (dd, <sup>2</sup>J<sub>HH</sub> = 12.9 Hz and <sup>3</sup>J<sub>HH</sub> = 8.1 Hz, 0.6H), 1.66 (s, 1.8H), 1.63 (s, 1.2H), 1.55 (s, 5.4H), 1.50 (s, 3.6H). <sup>13</sup>C NMR (CDCl<sub>3</sub>):  $\delta$  154.2, 154.0, 138.2, 135.2, 135.1, 129.9, 129.6, 128.2, 127.9, 126.2, 126.0, 123.5, 123.3, 79.5, 79.1, 65.9, 65.6, 56.9, 56.6, 41.3, 39.8, 28.70, 28.66, 14.2, 14.1. HRMS (ESI-TOF) calcd for C<sub>17</sub>H<sub>23</sub>NO<sub>2</sub>Na (M+Na<sup>+</sup>) 296.1621, found 296.1617.

Trifluoroacetic acid (7.5 mL) was added to a solution of (S)-3a (1.03 g, 3.77 mmol) in CH<sub>2</sub>Cl<sub>2</sub> (37 mL) and the mixture was stirred for 1.5 h at room temperature. The solvent was removed under vacuum, and the remaining trifluoroacetic acid was further removed by dissolving the residue in C<sub>6</sub>H<sub>6</sub> and concentrated under vacuum for three times, followed by the same sequence with hexane for three times. The residue thus obtained was chromatographed on silica gel with MeOH/CH<sub>2</sub>Cl<sub>2</sub> = 1/10 to afford compound (S)-S2 as a purple solid (1.03 g, 3.59 mmol; 95% yield). [ $\alpha$ ]<sub>D</sub><sup>25</sup> +54.5 (*c* 0.32, CHCl<sub>3</sub>).

<sup>1</sup>H NMR (CDCl<sub>3</sub>):  $\delta$  10.30 (bs, 1H), 9.23 (bs, 1H), 7.31 (t, <sup>3</sup>J<sub>HH</sub> = 7.5 Hz, 2H), 7.25 (t, <sup>3</sup>J<sub>HH</sub> = 8.1 Hz, 1H), 7.20 (d, <sup>3</sup>J<sub>HH</sub> = 6.8 Hz, 2H), 5.34 (s, 1H), 4.70-4.62 (m, 1H), 3.84 (d, <sup>2</sup>J<sub>HH</sub>

= 15.0 Hz, 1H), 3.80 (d,  $^2J_{\text{HH}} = 15.0$  Hz, 1H), 3.15 (dd,  $^2J_{\text{HH}} = 13.6$  Hz and  $^3J_{\text{HH}} = 6.1$  Hz, 1H), 2.95 (dd,  $^2J_{\text{HH}} = 13.6$  Hz and  $^3J_{\text{HH}} = 8.9$  Hz, 1H), 1.78 (s, 3H).  $^{13}\text{C}$  NMR ( $\text{CDCl}_3$ ):  $\delta$  162.8 (q,  $^2J_{\text{CF}} = 35.9$  Hz), 135.8, 135.3, 129.2, 128.8, 127.2, 122.4, 117.0 (q,  $^1J_{\text{CF}} = 293$  Hz), 66.9, 53.9, 39.3, 13.6. HRMS (ESI-TOF) calcd for  $\text{C}_{12}\text{H}_{16}\text{N}$  ( $\text{M}-\text{CF}_3\text{CO}_2^-$ ) 174.1277, found 174.1278.

1 M NaOH<sub>aq</sub> (15 mL) was added to a solution of (*S*)-**S2** (1.03 g, 3.59 mmol) in Et<sub>2</sub>O (5.0 mL) and the mixture was extracted with Et<sub>2</sub>O. The organic layer was dried over MgSO<sub>4</sub>, filtered, and concentrated under vacuum. The residue was dissolved in THF (9.0 mL), and Et<sub>3</sub>N (2.20 mL, 15.8 mmol) and chlorodiphenylphosphine (710  $\mu\text{L}$ , 3.95 mmol) were successively added to it with additional THF (2.0 mL). The mixture was stirred for 9 h at room temperature, and the volatiles were removed under vacuum. This was chromatographed on silica gel with degassed Et<sub>3</sub>N/hexane = 1/2 to afford compound (*S*)-**1a** as a yellow oil (1.06 g, 2.97 mmol; 83% yield).  $[\alpha]_{\text{D}}^{25} +235$  (*c* 1.03, THF).

$^1\text{H}$  NMR ( $\text{C}_6\text{D}_6$ ):  $\delta$  7.58 (t,  $^3J = 7.2$  Hz, 2H), 7.48 (t,  $^3J = 7.4$  Hz, 2H), 7.23-7.19 (m, 2H), 7.18-7.05 (m, 9H), 5.27-5.21 (m, 1H), 4.77-4.68 (m, 1H), 3.60 (bs, 2H), 3.44 (ddd,  $^2J_{\text{HH}} = 12.8$  Hz,  $^3J_{\text{HH}} = 3.9$  Hz, and  $^4J_{\text{HH}} = 2.8$  Hz, 1H), 2.75 (dd,  $^2J_{\text{HH}} = 12.8$  Hz and  $^3J_{\text{HH}} = 9.5$  Hz, 1H), 1.28 (s, 3H).  $^{13}\text{C}$  NMR ( $\text{C}_6\text{D}_6$ ):  $\delta$  140.2 (d,  $J_{\text{CP}} = 7.7$  Hz), 139.5 (d,  $J_{\text{CP}} = 18.1$  Hz), 139.4, 137.1, 134.9 (d,  $J_{\text{CP}} = 12.9$  Hz), 134.8 (d,  $J_{\text{CP}} = 12.9$  Hz), 132.7 (d,  $J_{\text{CP}} = 19.6$  Hz), 132.6 (d,  $J_{\text{CP}} = 19.6$  Hz), 130.0, 128.61 (d,  $J_{\text{CP}} = 5.7$  Hz), 128.59 (d,  $J_{\text{CP}} = 4.7$  Hz), 128.5 (d,  $J_{\text{CP}} = 4.1$  Hz), 126.3, 125.2 (d,  $J_{\text{CP}} = 6.7$  Hz), 73.1 (d,  $J_{\text{CP}} = 30.5$  Hz), 57.6 (d,  $J_{\text{CP}} = 9.3$  Hz), 45.2 (d,  $J_{\text{CP}} = 5.7$  Hz), 14.0.  $^{31}\text{P}\{^1\text{H}\}$  NMR ( $\text{C}_6\text{D}_6$ ):  $\delta$  43.5 (s). HRMS (ESI-TOF) calcd for  $\text{C}_{24}\text{H}_{25}\text{NP}$  ( $\text{M}+\text{H}^+$ ) 358.1719, found 358.1717.

## 2-(Benzyloxymethyl)-2-propenyl methanesulfonate

Et<sub>3</sub>N (5.40 mL, 38.7 mmol) and methanesulfonyl chloride (1.50 mL, 19.4 mmol) were successively added to a solution of 2-(benzyloxymethyl)-2-propenol (2.75 g, 15.4 mmol) in CH<sub>2</sub>Cl<sub>2</sub> (25 mL) at 0 °C. The mixture was stirred for 50 min at 0 °C and the reaction was quenched with saturated NaHCO<sub>3</sub><sub>aq</sub>. This was extracted with CH<sub>2</sub>Cl<sub>2</sub> and the organic layer was washed with saturated NaCl<sub>aq</sub>, dried over MgSO<sub>4</sub>, filtered, and concentrated under vacuum. The residue was chromatographed on silica gel with EtOAc/hexane = 1/4 to afford 2-(benzyloxymethyl)-2-propenyl methanesulfonate as a colorless oil (2.88 g, 11.2 mmol; 73% yield).

$^1\text{H}$  NMR ( $\text{CDCl}_3$ ):  $\delta$  7.38-7.28 (m, 5H), 5.40-5.37 (m, 2H), 4.76 (s, 2H), 4.52 (s, 2H), 4.08 (s, 2H), 2.99 (s, 3H).  $^{13}\text{C}$  NMR ( $\text{CDCl}_3$ ):  $\delta$  139.1, 137.8, 128.5, 127.9, 127.8, 118.2, 72.5, 70.2, 70.1, 37.8. HRMS (ESI-TOF) calcd for  $\text{C}_{12}\text{H}_{16}\text{O}_4\text{SNa}$  ( $\text{M}+\text{Na}^+$ ) 279.0662, found 279.0663.

## (*S*)-**1b**

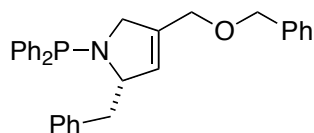

This was synthesized from (*S*)-**2** and 2-(benzyloxymethyl)-2-propenyl methanesulfonate, following the procedure for (*S*)-**1a**. Brown oil. 62% overall yield.  $[\alpha]_{\text{D}}^{25} +187$  (*c* 0.56, THF).

$^1\text{H}$  NMR ( $\text{C}_6\text{D}_6$ ):  $\delta$  7.57 (t,  $^3J = 7.1$  Hz, 2H), 7.46 (t,  $^3J = 7.6$  Hz, 2H), 7.21-7.11 (m, 13H), 7.09-7.04 (m, 3H), 5.56-5.53 (m, 1H), 4.80-4.73 (m, 1H), 4.15 (d,  $^2J_{\text{HH}} = 12.2$  Hz, 1H), 4.11 (d,  $^2J_{\text{HH}} = 12.1$  Hz, 1H), 3.86-3.76 (m, 2H), 3.68-3.61 (m, 2H), 3.38 (ddd,  $^2J_{\text{HH}} = 12.7$  Hz,

$^3J_{\text{HH}} = 4.2$  Hz, and  $^4J_{\text{HH}} = 2.8$  Hz, 1H), 2.80 (ddd,  $^2J_{\text{HH}} = 12.8$  Hz,  $^3J_{\text{HH}} = 9.3$  Hz, and  $^4J_{\text{HH}} = 0.6$  Hz, 1H).  $^{13}\text{C}$  NMR ( $\text{C}_6\text{D}_6$ ):  $\delta$  139.8 (d,  $J_{\text{CP}} = 7.2$  Hz), 139.3 (d,  $J_{\text{CP}} = 18.1$  Hz), 139.2, 139.0, 138.9, 134.9 (d,  $J_{\text{CP}} = 12.9$  Hz), 134.8 (d,  $J_{\text{CP}} = 12.9$  Hz), 132.7 (d,  $J_{\text{CP}} = 20.2$  Hz), 132.6 (d,  $J_{\text{CP}} = 19.1$  Hz), 130.0, 128.64 (d,  $J_{\text{CP}} = 6.2$  Hz), 128.59 (d,  $J_{\text{CP}} = 7.2$  Hz), 128.5 (d,  $J_{\text{CP}} = 5.2$  Hz), 127.9, 127.7, 127.3 (d,  $J_{\text{CP}} = 6.7$  Hz), 126.4, 72.9 (d,  $J_{\text{CP}} = 31.5$  Hz), 72.0, 66.9, 54.6 (d,  $J_{\text{CP}} = 9.3$  Hz), 44.7 (d,  $J_{\text{CP}} = 5.2$  Hz).  $^{31}\text{P}\{^1\text{H}\}$  NMR ( $\text{C}_6\text{D}_6$ ):  $\delta$  44.8 (s). HRMS (ESI-TOF) calcd for  $\text{C}_{31}\text{H}_{31}\text{NOP}$  ( $\text{M}+\text{H}^+$ ) 464.2138, found 464.2130.

### (S)-1c

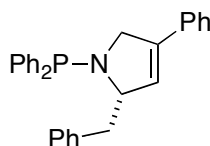

This was synthesized from (S)-2 and 2-phenyl-2-propenyl bromide, following the procedure for (S)-1a. Pink solid. 85% overall yield.  $[\alpha]_{\text{D}}^{25} +224$  ( $c$  0.53, THF).

$^1\text{H}$  NMR ( $\text{C}_6\text{D}_6$ ):  $\delta$  7.65-7.61 (m, 2H), 7.54-7.50 (m, 2H), 7.25-7.21 (m, 2H), 7.17-7.05 (m, 9H), 6.99-6.95 (m, 5H), 6.00 (dt,  $^3J_{\text{HH}} = 4.9$  Hz and  $^4J_{\text{HH}} = 2.2$  Hz, 1H), 4.92-4.85 (m, 1H), 4.24-4.15 (m, 2H), 3.52 (ddd,  $^2J_{\text{HH}} = 12.8$  Hz,  $^3J_{\text{HH}} = 4.2$  Hz, and  $^4J = 2.8$  Hz, 1H), 2.80 (dd,  $^2J_{\text{HH}} = 12.8$  Hz and  $^3J_{\text{HH}} = 9.5$  Hz, 1H).  $^{13}\text{C}$  NMR ( $\text{C}_6\text{D}_6$ ):  $\delta$  139.9 (d,  $J_{\text{CP}} = 8.3$  Hz), 139.6, 139.14 (d,  $J_{\text{CP}} = 17.6$  Hz), 139.09, 134.9 (d,  $J_{\text{CP}} = 12.9$  Hz), 134.8 (d,  $J_{\text{CP}} = 12.9$  Hz), 134.2, 132.7 (d,  $J_{\text{CP}} = 20.2$  Hz), 132.5 (d,  $J_{\text{CP}} = 19.6$  Hz), 130.0, 128.72 (d,  $J_{\text{CP}} = 6.2$  Hz), 128.68 (d,  $J_{\text{CP}} = 8.8$  Hz), 128.66 (d,  $J_{\text{CP}} = 6.2$  Hz), 128.6, 127.8, 126.4, 125.9, 125.5 (d,  $J_{\text{CP}} = 6.7$  Hz), 73.6 (d,  $J_{\text{CP}} = 31.0$  Hz), 54.5 (d,  $J_{\text{CP}} = 9.3$  Hz), 45.1 (d,  $J_{\text{CP}} = 6.2$  Hz).  $^{31}\text{P}\{^1\text{H}\}$  NMR ( $\text{C}_6\text{D}_6$ ):  $\delta$  44.2 (s). HRMS (ESI-TOF) calcd for  $\text{C}_{29}\text{H}_{27}\text{NP}$  ( $\text{M}+\text{H}^+$ ) 420.1876, found 420.1864.

### Rh(acac)((S)-1a) (4)

A solution of (S)-1a (318 mg, 0.890 mmol) in  $\text{C}_6\text{H}_6$  (4.0 mL) was added slowly over 25 min to a solution of  $\text{Rh}(\text{acac})(\text{C}_2\text{H}_4)_2$  (214 mg, 0.829 mmol) in  $\text{C}_6\text{H}_6$  (1.0 mL) at 30 °C, and the mixture was stirred for 1 h at 30 °C. The reaction mixture was filtered through PTFE membrane with  $\text{C}_6\text{H}_6$  and the solvent was removed under vacuum. The solid thus obtained was washed with hexane and dried under vacuum to afford complex 4 as a yellow solid (396 mg, 0.708 mmol; 85% yield).  $[\alpha]_{\text{D}}^{25} -20.5$  ( $c$  0.52, THF). Recrystallization of this complex from benzene/pentane afforded single crystals suitable for X-ray crystallographic analysis.

$^1\text{H}$  NMR ( $\text{C}_6\text{D}_6$ ):  $\delta$  8.25-8.18 (m, 2H), 7.98-7.92 (m, 2H), 7.17-7.07 (m, 3H), 7.06-6.94 (m, 8H), 5.36 (s, 1H), 3.75 (s, 1H), 3.52-3.45 (m, 1H), 2.84 (t,  $J_{\text{HH}} = 14.0$  Hz, 1H), 2.63 (dd,  $^2J_{\text{HH}} = 12.8$  Hz and  $^3J_{\text{HP}} = 8.8$  Hz, 1H), 2.44-2.29 (m, 2H), 1.97 (s, 3H), 1.93 (s, 3H), 1.89 (s, 3H).  $^{31}\text{P}\{^1\text{H}\}$  NMR ( $\text{C}_6\text{D}_6$ ):  $\delta$  127.9 (d,  $^1J_{\text{PRh}} = 202$  Hz). Anal. Calcd for  $\text{C}_{29}\text{H}_{31}\text{NO}_2\text{PRh}$ : C, 62.26; H, 5.59. Found: C, 62.27; H, 5.52.

### General Procedure for $[\text{RhCl}((S)\text{-1})_2]$

A solution of (S)-1 (1.0 equiv) in  $\text{C}_6\text{H}_6$  (ca. 5.0 mL for 1.0 mmol of (S)-1) was added slowly over 20 min to a solution of  $[\text{RhCl}(\text{C}_2\text{H}_4)_2]_2$  (1.1 equiv Rh) in  $\text{C}_6\text{H}_6$  (ca. 2.5 mL for 1.0 mmol of (S)-1) at 30 °C, and the mixture was stirred for 1 h at 30 °C. The reaction mixture was filtered through PTFE membrane with  $\text{C}_6\text{H}_6$  and the solvent was removed under vacuum. The solid thus obtained was washed with hexane and dried under vacuum to afford complex  $[\text{RhCl}((S)\text{-1})_2]$ , which was directly used as a catalyst for the addition reaction.

### III. Catalytic Reactions

#### General Procedure for Table 1.

4 M KOH<sub>aq</sub> (10  $\mu$ L, 40  $\mu$ mol) was added to a solution of [RhCl((*S*)-**1c**)<sub>2</sub>] (5.6 mg, 10  $\mu$ mol Rh), imine **5** (0.200 mmol), and organoboroxine (0.600 mmol B) in dioxane (0.50 mL), and the mixture was stirred for 6 h at 60 °C. This was directly passed through a pad of silica gel with EtOAc and the solvent was removed under vacuum. The residue was purified by silica gel preparative TLC to afford compound **6**.

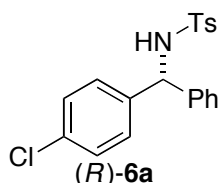

**Entry 1.** (CAS 796966-21-7 for (*R*)-enantiomer) White solid. 90% yield.

The ee was determined on a Daicel Chiralcel OD-H column with hexane/2-propanol = 80/20, flow = 0.5 mL/min. Retention times: 16.8 min [minor enantiomer], 22.0 min [major enantiomer]. 97% ee.  $[\alpha]^{20}_D +6.1$  (*c* 0.93, CHCl<sub>3</sub>). The absolute configuration was determined by comparison of the optical rotation with the literature value.<sup>9</sup>

<sup>1</sup>H NMR (CDCl<sub>3</sub>):  $\delta$  7.55 (d, <sup>3</sup>*J*<sub>HH</sub> = 8.1 Hz, 2H), 7.24-7.14 (m, 7H), 7.07-7.03 (m, 4H), 5.53 (d, <sup>3</sup>*J*<sub>HH</sub> = 6.8 Hz, 1H), 5.06 (d, <sup>3</sup>*J*<sub>HH</sub> = 6.8 Hz, 1H), 2.39 (s, 3H). <sup>13</sup>C NMR (CDCl<sub>3</sub>):  $\delta$  143.5, 140.2, 139.2, 137.4, 133.5, 129.5, 128.9, 128.8, 128.7, 127.9, 127.4, 127.3, 60.9, 21.6.

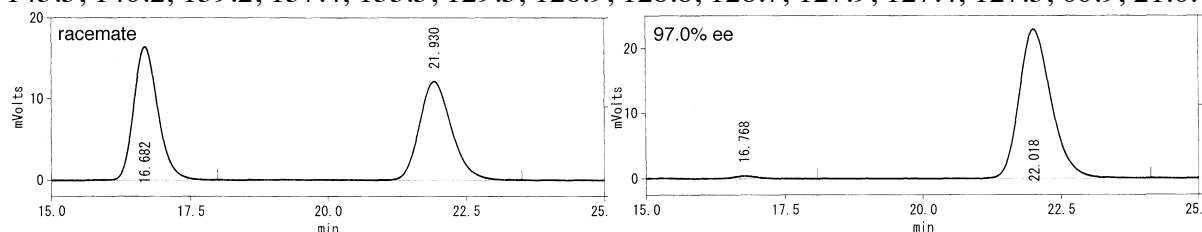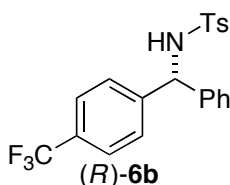

**Entry 3.** (CAS 831225-96-8 for (*R*)-enantiomer) White solid. 71% yield.

The ee was determined on a Daicel Chiralcel OD-H column with hexane/2-propanol = 80/20, flow = 0.5 mL/min. Retention times: 16.1 min [minor enantiomer], 25.0 min [major enantiomer]. 95% ee.  $[\alpha]^{20}_D -8.7$  (*c* 1.00, CHCl<sub>3</sub>). The absolute configuration was determined by comparison of the optical rotation with the literature value.<sup>9</sup>

<sup>1</sup>H NMR (CDCl<sub>3</sub>):  $\delta$  7.54 (d, <sup>3</sup>*J*<sub>HH</sub> = 8.3 Hz, 2H), 7.45 (d, <sup>3</sup>*J*<sub>HH</sub> = 8.2 Hz, 2H), 7.28-7.22 (m, 5H), 7.13 (d, <sup>3</sup>*J*<sub>HH</sub> = 7.9 Hz, 2H), 7.07-7.03 (m, 2H), 5.62 (d, <sup>3</sup>*J*<sub>HH</sub> = 7.2 Hz, 1H), 5.18 (d, <sup>3</sup>*J*<sub>HH</sub> = 6.8 Hz, 1H), 2.37 (s, 3H). <sup>13</sup>C NMR (CDCl<sub>3</sub>):  $\delta$  144.4, 143.7, 139.9, 137.2, 129.8 (q, <sup>2</sup>*J*<sub>CF</sub> = 31.6 Hz), 129.6, 129.0, 128.2, 127.9, 127.4, 127.3, 125.5, 124.1 (q, <sup>1</sup>*J*<sub>CF</sub> = 272 Hz), 61.1, 21.5.

<sup>9</sup> Tokunaga, N.; Otomaru, Y.; Okamoto, K.; Ueyama, K.; Shintani, R.; Hayashi, T. *J. Am. Chem. Soc.* **2004**, *126*, 13584.

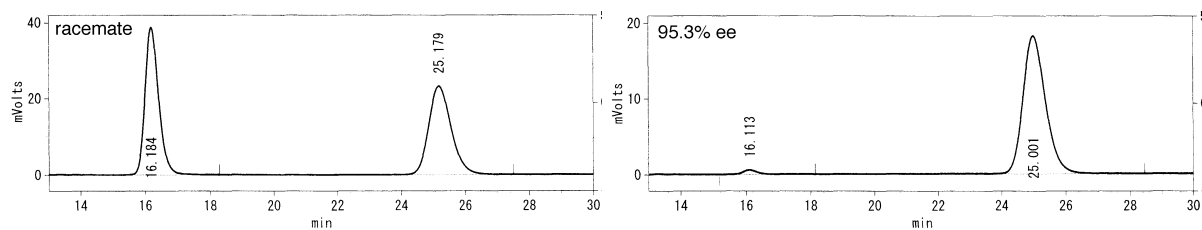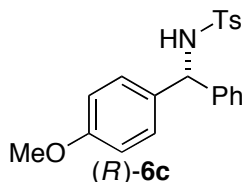

**Entry 4.** (CAS 796966-22-8 for (*R*)-enantiomer) Pale yellow solid. 90% yield.

The ee was determined on a Daicel Chiralcel OD-H column with hexane/2-propanol = 80/20, flow = 0.5 mL/min. Retention times: 20.3 min [minor enantiomer], 32.1 min [major enantiomer]. 97% ee.  $[\alpha]_D^{20} +20.4$  (*c* 1.00, CHCl<sub>3</sub>). The absolute configuration was determined by comparison of the optical rotation with the literature value.<sup>9</sup>

<sup>1</sup>H NMR (CDCl<sub>3</sub>): δ 7.55 (d, <sup>3</sup>*J*<sub>HH</sub> = 8.2 Hz, 2H), 7.23-7.16 (m, 3H), 7.13 (d, <sup>3</sup>*J*<sub>HH</sub> = 8.4 Hz, 2H), 7.12-7.07 (m, 2H), 6.99 (d, <sup>3</sup>*J*<sub>HH</sub> = 8.8 Hz, 2H), 6.72 (d, <sup>3</sup>*J*<sub>HH</sub> = 8.5 Hz, 2H), 5.52 (d, <sup>3</sup>*J*<sub>HH</sub> = 7.1 Hz, 1H), 5.15 (d, <sup>3</sup>*J*<sub>HH</sub> = 7.1 Hz, 1H), 3.74 (s, 3H), 2.37 (s, 3H). <sup>13</sup>C NMR (CDCl<sub>3</sub>): δ 159.1, 143.2, 140.9, 137.6, 132.9, 129.4, 128.7, 128.6, 127.6, 127.4, 127.3, 114.0, 60.9, 55.4, 21.6.

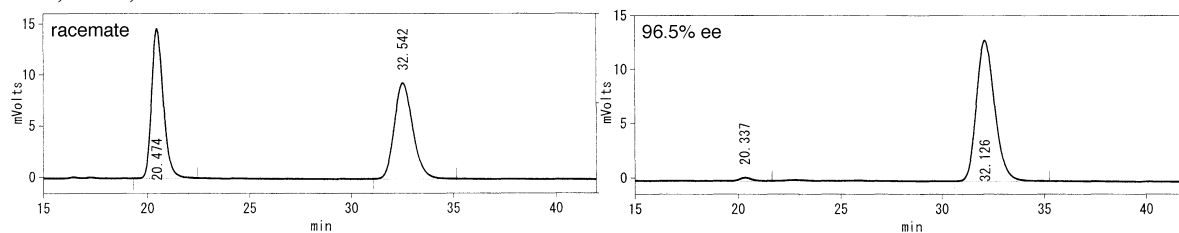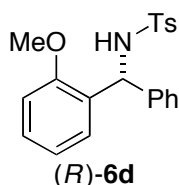

**Entry 5.** (CAS 898269-04-0 for (*R*)-enantiomer) White solid. 95% yield.

The ee was determined on a Daicel Chiralcel OD-H column with hexane/2-propanol = 80/20, flow = 0.5 mL/min. Retention times: 15.0 min [major enantiomer], 17.6 min [minor enantiomer]. 94% ee.  $[\alpha]_D^{20} +27.5$  (*c* 1.01, CHCl<sub>3</sub>). The absolute configuration was determined by comparison of the optical rotation with the literature value.<sup>9</sup>

<sup>1</sup>H NMR (CDCl<sub>3</sub>): δ 7.51 (d, <sup>3</sup>*J*<sub>HH</sub> = 8.2 Hz, 2H), 7.24-7.14 (m, 6H), 7.05 (d, <sup>3</sup>*J*<sub>HH</sub> = 8.1 Hz, 2H), 6.97 (dd, <sup>3</sup>*J*<sub>HH</sub> = 7.5 Hz and <sup>4</sup>*J*<sub>HH</sub> = 1.4 Hz, 1H), 6.78 (td, <sup>3</sup>*J*<sub>HH</sub> = 7.5 Hz and <sup>4</sup>*J*<sub>HH</sub> = 1.4 Hz, 1H), 6.68 (d, <sup>3</sup>*J*<sub>HH</sub> = 8.1 Hz, 1H), 5.76 (d, <sup>3</sup>*J*<sub>HH</sub> = 9.5 Hz, 1H), 5.65 (d, <sup>3</sup>*J*<sub>HH</sub> = 9.6 Hz, 1H), 3.59 (s, 3H), 2.32 (s, 3H). <sup>13</sup>C NMR (CDCl<sub>3</sub>): δ 156.5, 142.9, 140.7, 137.6, 129.7, 129.2, 129.1, 128.2, 127.8, 127.2, 127.1, 126.9, 120.8, 111.2, 59.1, 55.4, 21.5.

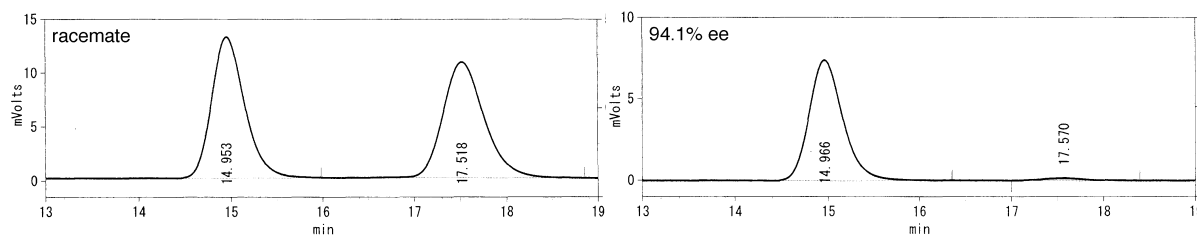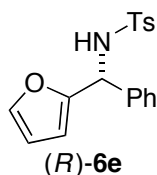

(R)-6e

**Entry 6.** (CAS 158568-79-7 for (R)-enantiomer) Gray solid. 83% yield.

The ee was determined on a Daicel Chiralcel OD-H column with hexane/2-propanol = 90/10, flow = 0.5 mL/min. Retention times: 24.6 min [minor enantiomer], 26.6 min [major enantiomer]. 96% ee.  $[\alpha]_{\text{D}}^{20} +14.8$  (*c* 1.02, CHCl<sub>3</sub>). The absolute configuration was determined by comparison of the optical rotation with the literature value.<sup>9</sup>

<sup>1</sup>H NMR (CDCl<sub>3</sub>):  $\delta$  7.58 (d, <sup>3</sup>J<sub>HH</sub> = 8.1 Hz, 2H), 7.26-7.23 (m, 4H), 7.20-7.17 (m, 2H), 7.16 (d, <sup>3</sup>J<sub>HH</sub> = 8.5 Hz, 2H), 6.19 (dd, <sup>3</sup>J<sub>HH</sub> = 3.3 and 1.8 Hz, 1H), 5.99 (d, <sup>3</sup>J<sub>HH</sub> = 3.2 Hz, 1H), 5.62 (d, <sup>3</sup>J<sub>HH</sub> = 7.7 Hz, 1H), 5.12 (d, <sup>3</sup>J<sub>HH</sub> = 7.3 Hz, 1H), 2.38 (s, 3H). <sup>13</sup>C NMR (CDCl<sub>3</sub>):  $\delta$  152.4, 143.3, 142.7, 138.4, 137.5, 129.5, 128.7, 128.1, 127.4, 127.2, 110.4, 108.5, 55.6, 21.6.

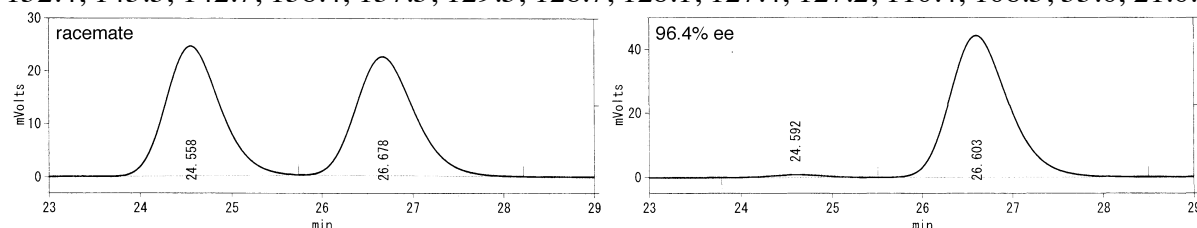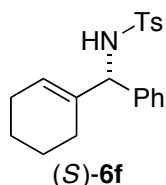

(S)-6f

**Entry 7.** The reaction was conducted for 24 h using 0.4 equiv of KOH. White solid. 73% yield.

The ee was determined on a Daicel Chiralcel OJ-H column with hexane/2-propanol = 98/2, flow = 0.5 mL/min. Retention times: 72.4 min [major enantiomer], 87.2 min [minor enantiomer]. 97% ee.  $[\alpha]_{\text{D}}^{20} -11.8$  (*c* 1.01, CHCl<sub>3</sub>). The absolute configuration was assigned by analogy with entry 1.

<sup>1</sup>H NMR (CDCl<sub>3</sub>):  $\delta$  7.63 (d, <sup>3</sup>J<sub>HH</sub> = 8.3 Hz, 2H), 7.23-7.16 (m, 5H), 7.14-7.10 (m, 2H), 5.57-5.53 (m, 1H), 4.86 (d, <sup>3</sup>J<sub>HH</sub> = 7.9 Hz, 1H), 4.83 (d, <sup>3</sup>J<sub>HH</sub> = 7.9 Hz, 1H), 2.39 (s, 3H), 1.98-1.82 (m, 2H), 1.74-1.58 (m, 2H), 1.50-1.32 (m, 4H). <sup>13</sup>C NMR (CDCl<sub>3</sub>):  $\delta$  143.2, 139.6, 137.9, 135.7, 129.4, 128.5, 127.5, 127.0, 125.9, 63.4, 25.2, 25.0, 22.4, 22.1, 21.6. Anal. Calcd for C<sub>20</sub>H<sub>23</sub>NO<sub>2</sub>S: C, 70.35; H, 6.79. Found: C, 70.27; H, 6.57.

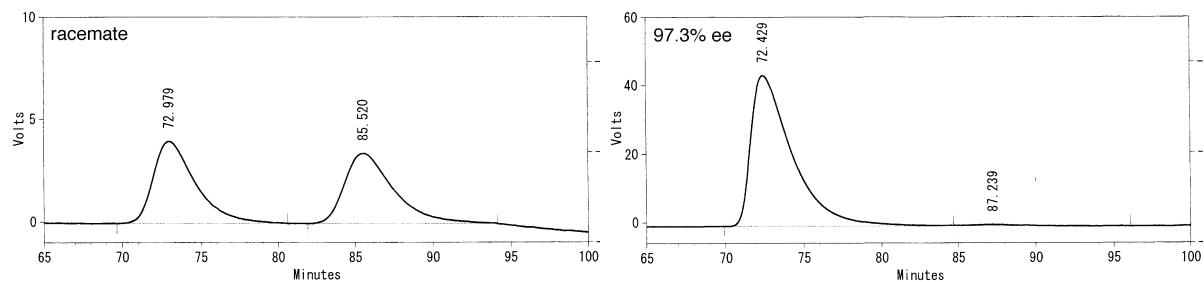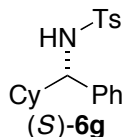

**Entry 8.** (CAS 1112116-79-6 for (S)-enantiomer) The reaction was conducted in dioxane/H<sub>2</sub>O (100/1). White solid. 73% yield.

The ee was determined on a Daicel Chiralcel OD-H column with hexane/2-propanol = 80/20, flow = 0.5 mL/min. Retention times: 9.6 min [minor enantiomer], 15.3 min [major enantiomer]. 96% ee.  $[\alpha]^{20}_D -27.0$  (*c* 0.64, CHCl<sub>3</sub>). The absolute configuration was assigned by analogy with entry 1.

<sup>1</sup>H NMR (CDCl<sub>3</sub>): δ 7.45 (d, <sup>3</sup>J<sub>HH</sub> = 8.3 Hz, 2H), 7.11-7.07 (m, 3H), 7.03 (d, <sup>3</sup>J<sub>HH</sub> = 8.0 Hz, 2H), 6.93-6.87 (m, 2H), 4.98 (d, <sup>3</sup>J<sub>HH</sub> = 8.2 Hz, 1H), 4.03 (t, <sup>3</sup>J<sub>HH</sub> = 8.1 Hz, 1H), 2.31 (s, 3H), 1.97-1.91 (m, 1H), 1.77-1.70 (m, 1H), 1.65-1.51 (m, 3H), 1.32-1.25 (m, 1H), 1.20-1.02 (m, 3H), 0.98-0.80 (m, 2H). <sup>13</sup>C NMR (CDCl<sub>3</sub>): δ 142.7, 140.1, 137.9, 129.2, 128.1, 127.14, 127.12, 126.9, 63.6, 43.9, 29.9, 29.6, 26.3, 26.0, 21.5.

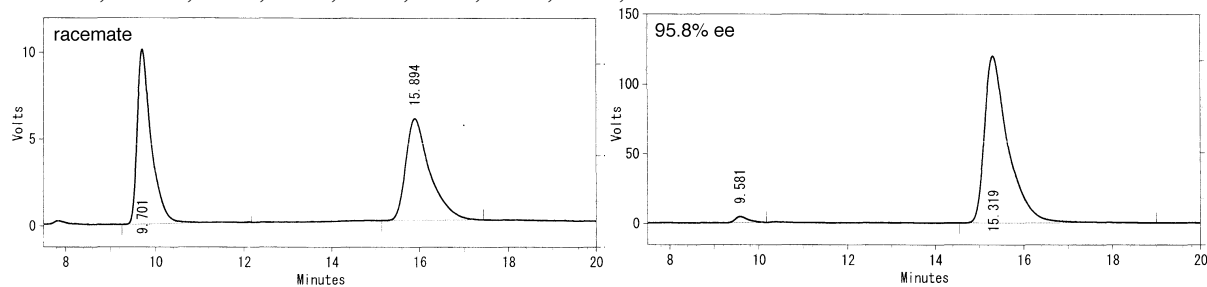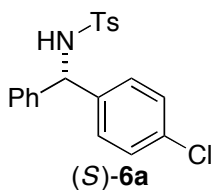

**Entry 9.** (CAS 796966-17-1 for (S)-enantiomer) White solid. 83% yield.

The ee was determined on a Daicel Chiralcel OD-H column with hexane/2-propanol = 80/20, flow = 0.5 mL/min. Retention times: 17.1 min [major enantiomer], 22.9 min [minor enantiomer]. 96% ee.  $[\alpha]^{20}_D -4.7$  (*c* 0.99, CHCl<sub>3</sub>). The absolute configuration was determined by comparison of the optical rotation with the literature value.<sup>9</sup>

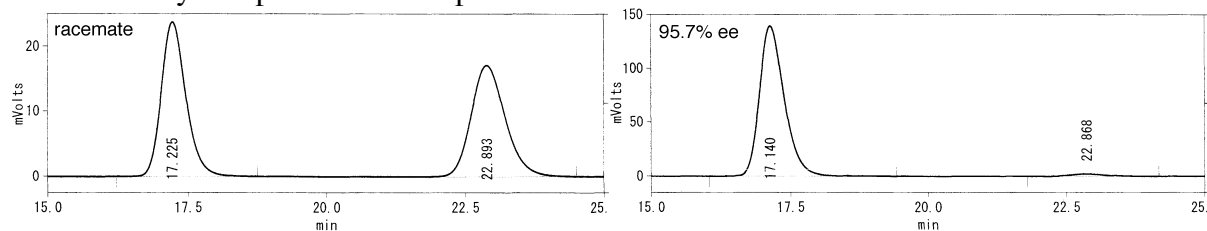



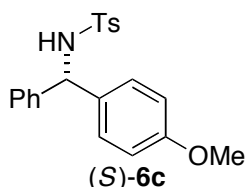

**Entry 10.** (CAS 796966-18-2 for (S)-enantiomer) Pale brown solid. 87% yield.

The ee was determined on a Daicel Chiralcel OD-H column with hexane/2-propanol = 80/20, flow = 0.5 mL/min. Retention times: 19.9 min [major enantiomer], 31.3 min [minor enantiomer]. 96% ee.  $[\alpha]_D^{20}$  -19.1 (*c* 1.00, CHCl<sub>3</sub>). The absolute configuration was determined by comparison of the optical rotation with the literature value.<sup>9</sup>

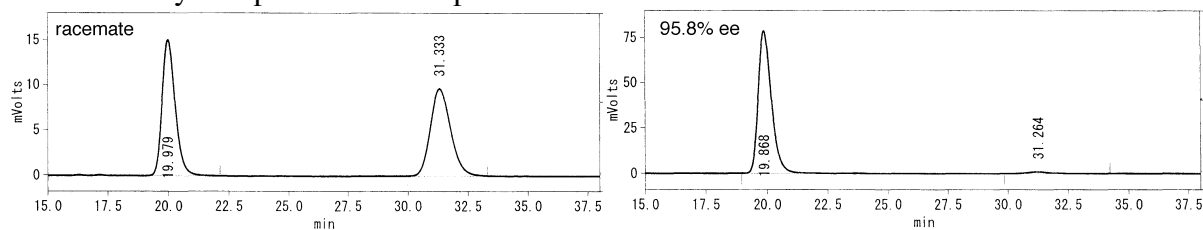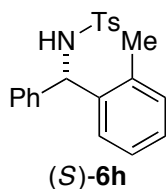

**Entry 11.** (CAS 738626-20-5 for (S)-enantiomer) The reaction was conducted for 24 h using 0.4 equiv of KOH. Pale yellow solid. 70% yield.

The ee was determined on a Daicel Chiralcel OD-H column with hexane/2-propanol = 80/20, flow = 0.5 mL/min. Retention times: 12.9 min [minor enantiomer], 15.6 min [major enantiomer]. 96% ee.  $[\alpha]_D^{20}$  +10.3 (*c* 0.99, CHCl<sub>3</sub>). The absolute configuration was determined by comparison of the optical rotation with the literature value.<sup>9</sup>

<sup>1</sup>H NMR (CDCl<sub>3</sub>):  $\delta$  7.55 (d, <sup>3</sup>J<sub>HH</sub> = 8.0 Hz, 2H), 7.22-7.17 (m, 3H), 7.15-7.09 (m, 4H), 7.08-7.02 (m, 4H), 5.80 (d, <sup>3</sup>J<sub>HH</sub> = 7.1 Hz, 1H), 4.96 (d, <sup>3</sup>J<sub>HH</sub> = 6.5 Hz, 1H), 2.37 (s, 3H), 2.16 (s, 3H). <sup>13</sup>C NMR (CDCl<sub>3</sub>):  $\delta$  143.3, 140.1, 138.4, 137.6, 135.6, 130.8, 129.4, 128.7, 127.7, 127.3, 127.2, 126.3, 58.2, 21.6, 19.5.

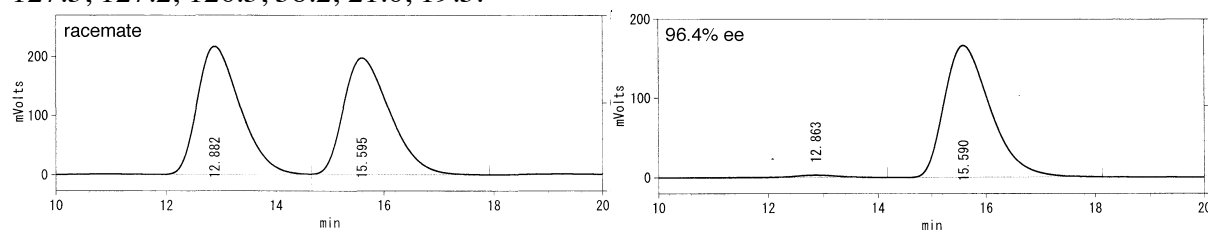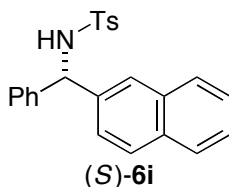

**Entry 12.** (CAS 1171048-75-1 for racemate) White solid. 93% yield.

The ee was determined on two Daicel Chiralpak AD-H columns with hexane/2-propanol = 80/20, flow = 0.3 mL/min. Retention times: 94.7 min [minor enantiomer], 103.1 min [major enantiomer]. 98% ee.  $[\alpha]_D^{20}$  -14.9 (*c* 0.99, CHCl<sub>3</sub>). The absolute configuration was assigned by analogy with entry 1.

$^1\text{H}$  NMR ( $\text{CDCl}_3$ ):  $\delta$  7.78-7.73 (m, 1H), 7.67 (d,  $^3J_{\text{HH}} = 8.6$  Hz, 1H), 7.66-7.64 (m, 1H), 7.55 (d,  $^3J_{\text{HH}} = 8.3$  Hz, 2H), 7.50 (s, 1H), 7.47-7.43 (m, 2H), 7.25-7.20 (m, 3H), 7.18-7.14 (m, 3H), 7.03 (d,  $^3J_{\text{HH}} = 8.0$  Hz, 2H), 5.74 (d,  $^3J_{\text{HH}} = 7.4$  Hz, 1H), 5.29 (bs, 1H), 2.27 (s, 3H).  $^{13}\text{C}$  NMR ( $\text{CDCl}_3$ ):  $\delta$  143.3, 140.5, 137.7, 137.5, 133.1, 132.7, 129.4, 128.7, 128.6, 128.1, 127.7, 127.64, 127.59, 127.3, 126.5, 126.3, 126.2, 125.3, 61.6, 21.5.

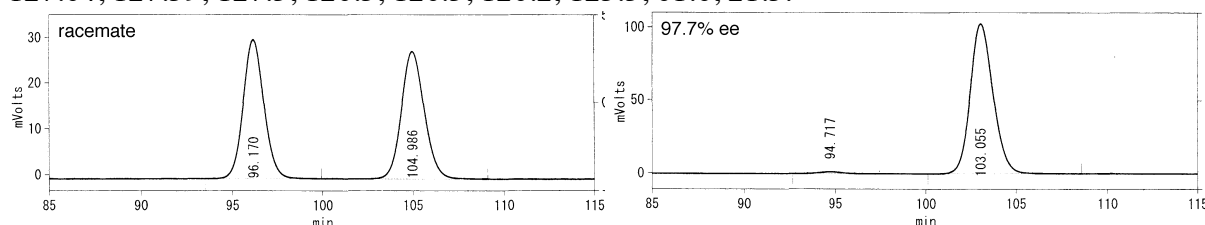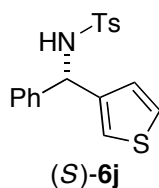

**Entry 13.** (CAS 1032583-00-8 for racemate) Pale brown solid. 88% yield.

The ee was determined on a Daicel Chiralcel OD-H column with hexane/2-propanol = 80/20, flow = 0.5 mL/min. Retention times: 15.1 min [major enantiomer], 19.8 min [minor enantiomer]. 96% ee.  $[\alpha]_D^{20} +3.3$  ( $c$  1.02,  $\text{CHCl}_3$ ). The absolute configuration was assigned by analogy with entry 1.

$^1\text{H}$  NMR ( $\text{CDCl}_3$ ):  $\delta$  7.56 (d,  $^3J_{\text{HH}} = 8.0$  Hz, 2H), 7.23-7.17 (m, 4H), 7.14 (d,  $^3J_{\text{HH}} = 8.1$  Hz, 2H), 7.13-7.09 (m, 2H), 6.89-6.86 (m, 1H), 6.77 (d,  $^3J_{\text{HH}} = 5.0$  Hz, 1H), 5.62 (d,  $^3J_{\text{HH}} = 7.6$  Hz, 1H), 5.03 (d,  $^3J_{\text{HH}} = 7.3$  Hz, 1H), 2.38 (s, 3H).  $^{13}\text{C}$  NMR ( $\text{CDCl}_3$ ):  $\delta$  143.3, 142.0, 140.3, 137.6, 129.5, 128.7, 127.8, 127.31, 127.26, 126.8, 126.6, 123.0, 57.7, 21.6.

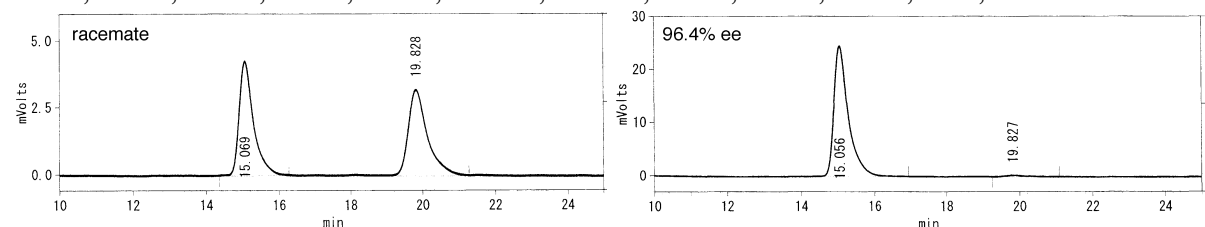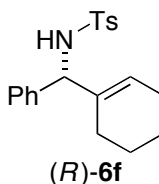

**Entry 14.** White solid. 86% yield.

The ee was determined on a Daicel Chiralcel OJ-H column with hexane/2-propanol = 98/2, flow = 0.5 mL/min. Retention times: 72.7 min [minor enantiomer], 82.6 min [major enantiomer]. 89% ee.  $[\alpha]_D^{20} +11.2$  ( $c$  1.00,  $\text{CHCl}_3$ ). The absolute configuration was assigned by analogy with entry 1.

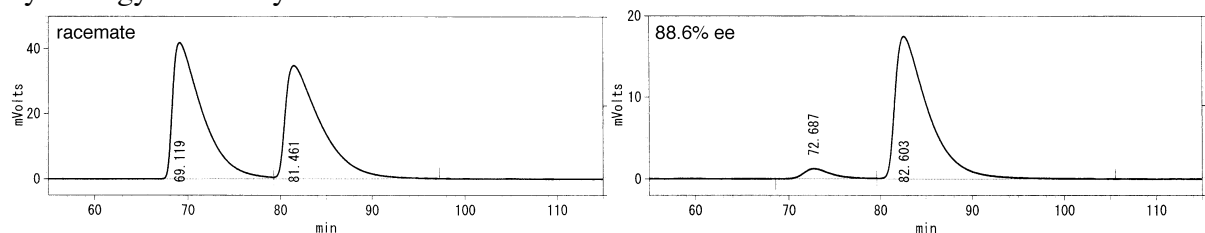

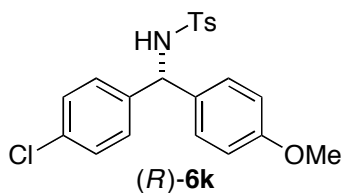

**Entry 15.** (CAS 796966-23-9 for *(R)*-enantiomer) Pale yellow solid. 91% yield.

The ee was determined on a Daicel Chiralcel OD-H column with hexane/2-propanol = 80/20, flow = 0.5 mL/min. Retention times: 26.1 min [major enantiomer], 35.1 min [minor enantiomer]. 95% ee.  $[\alpha]_D^{20}$  -13.7 (*c* 1.03, CHCl<sub>3</sub>). The absolute configuration was determined by comparison of the optical rotation with the literature value.<sup>9</sup>

<sup>1</sup>H NMR (CDCl<sub>3</sub>): δ 7.55 (d, <sup>3</sup>J<sub>HH</sub> = 8.3 Hz, 2H), 7.19-7.14 (m, 4H), 7.06 (d, <sup>3</sup>J<sub>HH</sub> = 8.8 Hz, 2H), 6.94 (d, <sup>3</sup>J<sub>HH</sub> = 8.8 Hz, 2H), 6.73 (d, <sup>3</sup>J<sub>HH</sub> = 8.8 Hz, 2H), 5.49 (d, <sup>3</sup>J<sub>HH</sub> = 6.8 Hz, 1H), 5.02 (d, <sup>3</sup>J<sub>HH</sub> = 6.4 Hz, 1H), 3.75 (s, 3H), 2.40 (s, 3H). <sup>13</sup>C NMR (CDCl<sub>3</sub>): δ 159.2, 143.4, 139.4, 137.4, 133.4, 132.4, 129.5, 128.8, 128.6, 127.3, 114.1, 60.4, 55.4, 21.6.

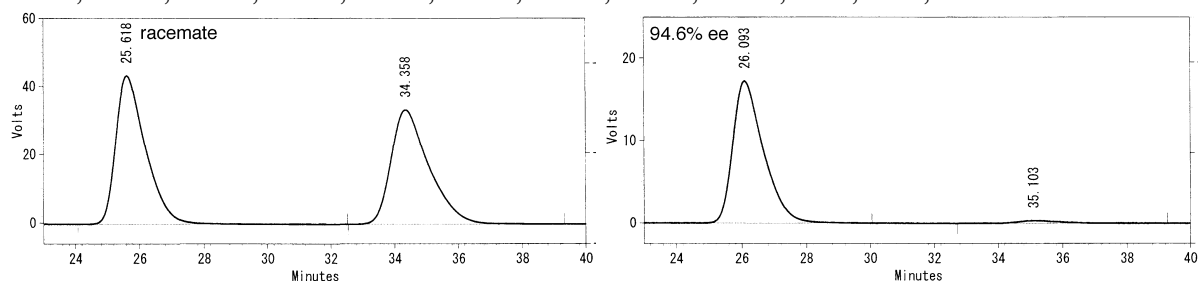

### Procedure for Equation 3.

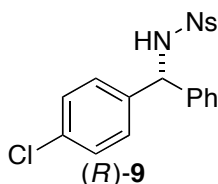

4 M KOH<sub>aq</sub> (10 μL, 40 μmol) was added to a solution of [RhCl(*(S)*-**1c**)<sub>2</sub>] (5.6 mg, 10 μmol Rh), imine **8** (64.9 mg, 0.200 mmol), and phenylboroxine (62.3 mg, 0.600 mmol **B**) in dioxane (0.50 mL), and the mixture was stirred for 6 h at 60 °C. This was directly passed through a pad of silica gel with EtOAc and the solvent was removed under vacuum. The residue was purified by silica gel preparative TLC with EtOAc/hexane/MeOH = 3/16/2 and then with CH<sub>2</sub>Cl<sub>2</sub>/hexane/MeOH = 100/20/1 to afford compound **9** (CAS 840529-66-0) as a white solid (61.3 mg, 0.152 mmol; 76% yield).

The ee was determined on a Daicel Chiralcel OD-H column with hexane/2-propanol = 80/20, flow = 0.5 mL/min. Retention times: 27.5 min [minor enantiomer], 50.6 min [major enantiomer]. 94% ee.  $[\alpha]_D^{20}$  +1.2 (*c* 1.00, CHCl<sub>3</sub>). The absolute configuration was determined by comparison of the optical rotation with the literature value.<sup>10</sup>

<sup>1</sup>H NMR (CDCl<sub>3</sub>): δ 8.14 (d, <sup>3</sup>J<sub>HH</sub> = 8.5 Hz, 2H), 7.78 (d, <sup>3</sup>J<sub>HH</sub> = 8.6 Hz, 2H), 7.24-7.19 (m, 5H), 7.09 (d, <sup>3</sup>J<sub>HH</sub> = 8.7 Hz, 2H), 7.06-7.03 (m, 2H), 5.69 (d, <sup>3</sup>J<sub>HH</sub> = 7.2 Hz, 1H), 5.28 (d, <sup>3</sup>J<sub>HH</sub> = 7.3 Hz, 1H). <sup>13</sup>C NMR (CDCl<sub>3</sub>): δ 149.9, 146.2, 139.1, 138.3, 134.2, 129.1, 129.0, 128.9, 128.44, 128.42, 127.4, 124.1, 61.2.

<sup>10</sup> Otomaru, Y.; Tokunaga, N.; Shintani, R.; Hayashi, T. *Org. Lett.* **2005**, *7*, 307.

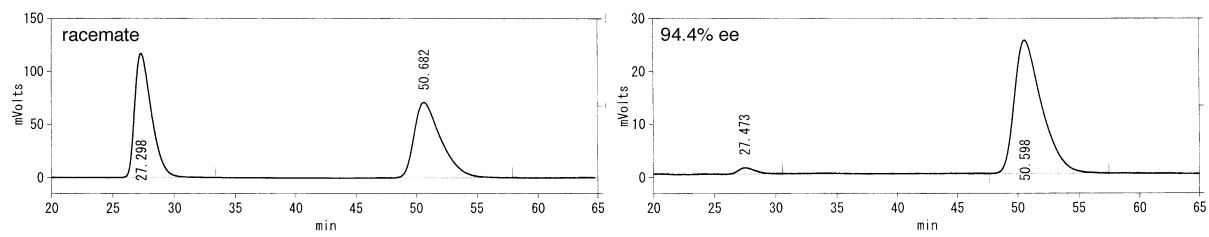

#### IV. X-ray Crystal Structure of Rh(acac)((S)-1a)

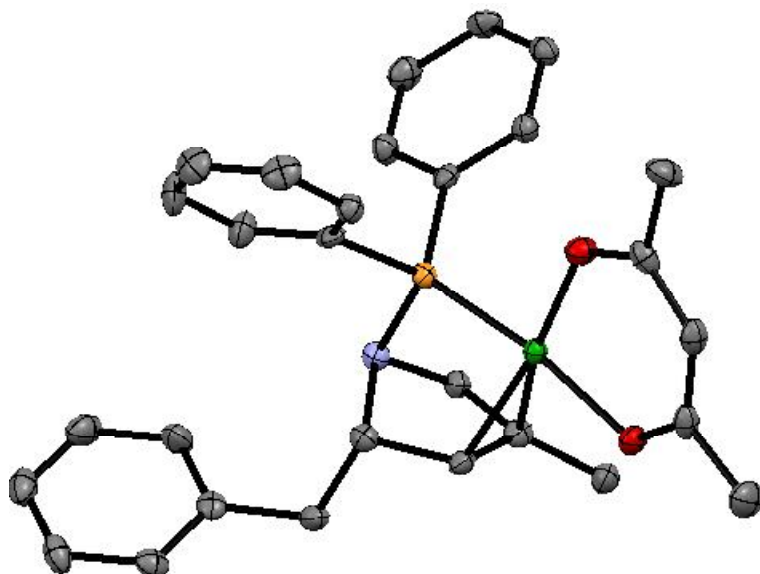

##### Data Collection

A yellow C<sub>6</sub>H<sub>6</sub> solution of Rh(acac)((S)-1a) was prepared. Crystals suitable for X-ray analysis were obtained by diffusion of pentane at room temperature.

A yellow prism crystal of C<sub>29</sub>H<sub>31</sub>NO<sub>2</sub>PRh having approximate dimensions of 0.20 x 0.10 x 0.10 mm was mounted on a glass fiber. All measurements were made on a Rigaku RAXIS RAPID imaging plate area detector with graphite monochromated Mo-K $\alpha$  radiation.

Indexing was performed from 3 oscillations that were exposed for 90 seconds. The crystal-to-detector distance was 127.40 mm.

Cell constants and an orientation matrix for data collection corresponded to a primitive orthorhombic cell with dimensions:

$$\begin{aligned} a &= 8.270(3) \text{ \AA} \\ b &= 11.652(5) \text{ \AA} \\ c &= 26.490(8) \text{ \AA} \\ V &= 2552.7(15) \text{ \AA}^3 \end{aligned}$$

For Z = 4 and F.W. = 559.45, the calculated density is 1.456 g/cm<sup>3</sup>. The systematic absences of:

$$\begin{aligned} h00: & h \pm 2n \\ 0k0: & k \pm 2n \\ 00l: & l \pm 2n \end{aligned}$$

uniquely determine the space group to be:

$$P2_12_12_1 \text{ (#19)}$$

The data were collected at a temperature of  $-150 \pm 1$  °C to a maximum 2 $\theta$  value of 55.0°. A total of 42 oscillation images were collected. A sweep of data was done using  $\omega$  scans from 130.0 to 190.0° in 5.0° step, at  $\chi = 45.0^\circ$  and  $\phi = 0.0^\circ$ . The exposure rate was 500.0 [sec./°]. A second sweep was performed using  $\omega$  scans from 0.0 to 160.0° in 5.0° step, at  $\chi = 45.0^\circ$

and  $\phi = 180.0^\circ$ . The exposure rate was 500.0 [sec./°]. The crystal-to-detector distance was 127.40 mm. Readout was performed in the 0.100 mm pixel mode.

### Data Reduction

Of the 22742 reflections that were collected, 5782 were unique ( $R_{\text{int}} = 0.102$ ).

The linear absorption coefficient,  $\mu$ , for Mo-K $\alpha$  radiation is 7.565 cm<sup>-1</sup>. The data were corrected for Lorentz and polarization effects.

### Structure Solution and Refinement

The structure was solved by direct methods<sup>11</sup> and expanded using Fourier techniques.<sup>12</sup> The non-hydrogen atoms were refined anisotropically. Hydrogen atoms were refined using the riding model. The final cycle of full-matrix least-squares refinement<sup>13</sup> on F was based on 18345 observed reflections ( $I > 2.00\sigma(I)$ ) and 339 variable parameters and converged (largest parameter shift was 0.01 times its esd) with unweighted and weighted agreement factors of:

$$R = \sum ||F_o| - |F_c|| / \sum |F_o| = 0.0594$$

$$R_w = [\sum w (|F_o| - |F_c|)^2 / \sum w F_o^2]^{1/2} = 0.0818$$

The standard deviation of an observation of unit weight<sup>14</sup> was 1.00. A Chebychev polynomial weighting scheme was used.<sup>15</sup> Plots of  $\sum w (|F_o| - |F_c|)^2$  versus  $|F_o|$ , reflection order in data collection,  $\sin \theta/\lambda$  and various classes of indices showed no unusual trends. The maximum and minimum peaks on the final difference Fourier map corresponded to 3.06 and  $-3.34 \text{ e}^-/\text{\AA}^3$ , respectively. The absolute structure was deduced based on Flack parameter, 0.04(3), refined using 2473 Friedel pairs.<sup>16</sup>

Neutral atom scattering factors were taken from Cromer and Waber.<sup>17</sup> Anomalous dispersion effects were included in  $F_{\text{calc}}$ ;<sup>18</sup> the values for  $\Delta f'$  and  $\Delta f''$  were those of Creagh and McAuley.<sup>19</sup> The values for the mass attenuation coefficients are those of Creagh and

---

<sup>11</sup> SIR92: Altomare, A.; Cascarano, G.; Giacovazzo, C.; Guagliardi, A.; Burla, M.; Polidori, G.; Camalli, M. *J. Appl. Cryst.* **1994**, *27*, 435.

<sup>12</sup> DIRDIF99: Beurskens, P. T.; Admiraal, G.; Beurskens, G.; Bosman, W. P.; de Gelder, R.; Israel, R.; Smits, J. M. M. The DIRDIF-99 program system, Technical Report of the Crystallography Laboratory, University of Nijmegen, The Netherlands (1999).

<sup>13</sup> Least Squares function minimized:

$$\sum w (|F_o| - |F_c|)^2 \quad \text{where } w = \text{Least Squares weights.}$$

<sup>14</sup> Standard deviation of an observation of unit weight:

$$[\sum w (|F_o| - |F_c|)^2 / (N_o - N_v)]^{1/2}$$

where:  $N_o$  = number of observations,  $N_v$  = number of variables

<sup>15</sup> Carruthers, J. R.; Watkin, D. J. *Acta Crystallogr.* **1979**, *A35*, 698.

<sup>16</sup> Flack, H. D. *Acta Crystallogr.* **1983**, *A39*, 876.

<sup>17</sup> Cromer, D. T.; Waber, J. T. "International Tables for X-ray Crystallography", Vol. IV, The Kynoch Press, Birmingham, England, Table 2.2 A (1974).

<sup>18</sup> Ibers, J. A.; Hamilton, W. C. *Acta Crystallogr.* **1964**, *17*, 781.

<sup>19</sup> Creagh, D. C.; McAuley, W. J. "International Tables for Crystallography", Vol C, (A. J. C. Wilson, ed.), Kluwer Academic Publishers, Boston, Table 4.2.6.8, pages 219–222 (1992).

Hubbell.<sup>20</sup> All calculations were performed using the CrystalStructure<sup>21,22</sup> crystallographic software package.

The crystal structure has been deposited at the Cambridge Crystallographic Data Centre (deposition number: CCDC 819417). The data can be obtained free of charge via the Internet at [www.ccdc.cam.ac.uk/conts/retrieving.html](http://www.ccdc.cam.ac.uk/conts/retrieving.html).

---

<sup>20</sup> Creagh, D. C.; Hubbell, J. H. "International Tables for Crystallography", Vol C, (A. J. C. Wilson, ed.), Kluwer Academic Publishers, Boston, Table 4.2.4.3, pages 200–206 (1992).

<sup>21</sup> CrystalStructure 3.8: Crystal Structure Analysis Package, Rigaku and Rigaku Americas (2000-2007). 9009 New Trails Dr. The Woodlands TX 77381 USA.

<sup>22</sup> CRYSTALS Issue 11: Carruthers, J. R.; Rollett, J. S.; Betteridge, P. W.; Kinna, D.; Pearce, L.; Larsen, A.; Gabe, E. Chemical Crystallography Laboratory, Oxford, UK (1999).

## Experimental Details

### A. Crystal Data

|                      |                                                                                       |
|----------------------|---------------------------------------------------------------------------------------|
| Empirical Formula    | C <sub>29</sub> H <sub>31</sub> NO <sub>2</sub> PRh                                   |
| Formula Weight       | 559.45                                                                                |
| Crystal Color, Habit | yellow, prism                                                                         |
| Crystal Dimensions   | 0.20 X 0.10 X 0.10 mm                                                                 |
| Crystal System       | orthorhombic                                                                          |
| Lattice Type         | Primitive                                                                             |
| Indexing Images      | 3 oscillations @ 90.0 seconds                                                         |
| Detector Position    | 127.40 mm                                                                             |
| Pixel Size           | 0.100 mm                                                                              |
| Lattice Parameters   | a = 8.270(3) Å<br>b = 11.652(5) Å<br>c = 26.490(8) Å<br>V = 2552.7(15) Å <sup>3</sup> |
| Space Group          | P2 <sub>1</sub> 2 <sub>1</sub> 2 <sub>1</sub> (#19)                                   |
| Z value              | 4                                                                                     |
| D <sub>calc</sub>    | 1.456 g/cm <sup>3</sup>                                                               |
| F <sub>000</sub>     | 1152.00                                                                               |
| μ(MoKα)              | 7.565 cm <sup>-1</sup>                                                                |



## B. Intensity Measurements

|                                                        |                                                                                  |
|--------------------------------------------------------|----------------------------------------------------------------------------------|
| Diffractometer                                         | Rigaku RAXIS-RAPID                                                               |
| Radiation                                              | MoK $\alpha$ ( $\lambda = 0.71075 \text{ \AA}$ )<br>graphite monochromated       |
| Detector Aperture                                      | 280 mm x 256 mm                                                                  |
| Data Images                                            | 42 exposures                                                                     |
| $\omega$ oscillation Range ( $\chi=45.0, \phi=0.0$ )   | 130.0 - 190.0°                                                                   |
| Exposure Rate                                          | 500.0 sec./°                                                                     |
| $\omega$ oscillation Range ( $\chi=45.0, \phi=180.0$ ) | 0.0 - 160.0°                                                                     |
| Exposure Rate                                          | 500.0 sec./°                                                                     |
| Detector Position                                      | 127.40 mm                                                                        |
| Pixel Size                                             | 0.100 mm                                                                         |
| $2\theta_{\max}$                                       | 55.0°                                                                            |
| No. of Reflections Measured                            | Total: 22742<br>Unique: 5782 ( $R_{\text{int}} = 0.102$ )<br>Friedel pairs: 2473 |
| Corrections                                            | Lorentz-polarization                                                             |

### C. Structure Solution and Refinement

|                                          |                                                                     |
|------------------------------------------|---------------------------------------------------------------------|
| Structure Solution                       | Direct Methods (SIR92)                                              |
| Refinement                               | Full-matrix least-squares on F                                      |
| Function Minimized                       | $\Sigma w ( F_o  -  F_c )^2$                                        |
| Least Squares Weights                    | Chebyshev polynomial with 3 parameters<br>63.9849, 68.2451, 17.9686 |
| $2\theta_{\text{max}}$ cutoff            | 55.0°                                                               |
| Anomalous Dispersion                     | All non-hydrogen atoms                                              |
| No. Observations ( $I > 2.00\sigma(I)$ ) | 18345                                                               |
| No. Variables                            | 339                                                                 |
| Reflection/Parameter Ratio               | 54.12                                                               |
| Residuals: R ( $I > 2.00\sigma(I)$ )     | 0.0594                                                              |
| Residuals: $R_w$ ( $I > 2.00\sigma(I)$ ) | 0.0818                                                              |
| Goodness of Fit Indicator                | 1.003                                                               |
| Flack parameter                          | 0.04(3)                                                             |
| Max Shift/Error in Final Cycle           | 0.006                                                               |
| Maximum peak in Final Diff. Map          | $3.06 \text{ e}^{-\text{\AA}^3}$                                    |
| Minimum peak in Final Diff. Map          | $-3.34 \text{ e}^{-\text{\AA}^3}$                                   |

### V. $^1\text{H}$ and $^{13}\text{C}$ NMR Spectra

compound **1a**

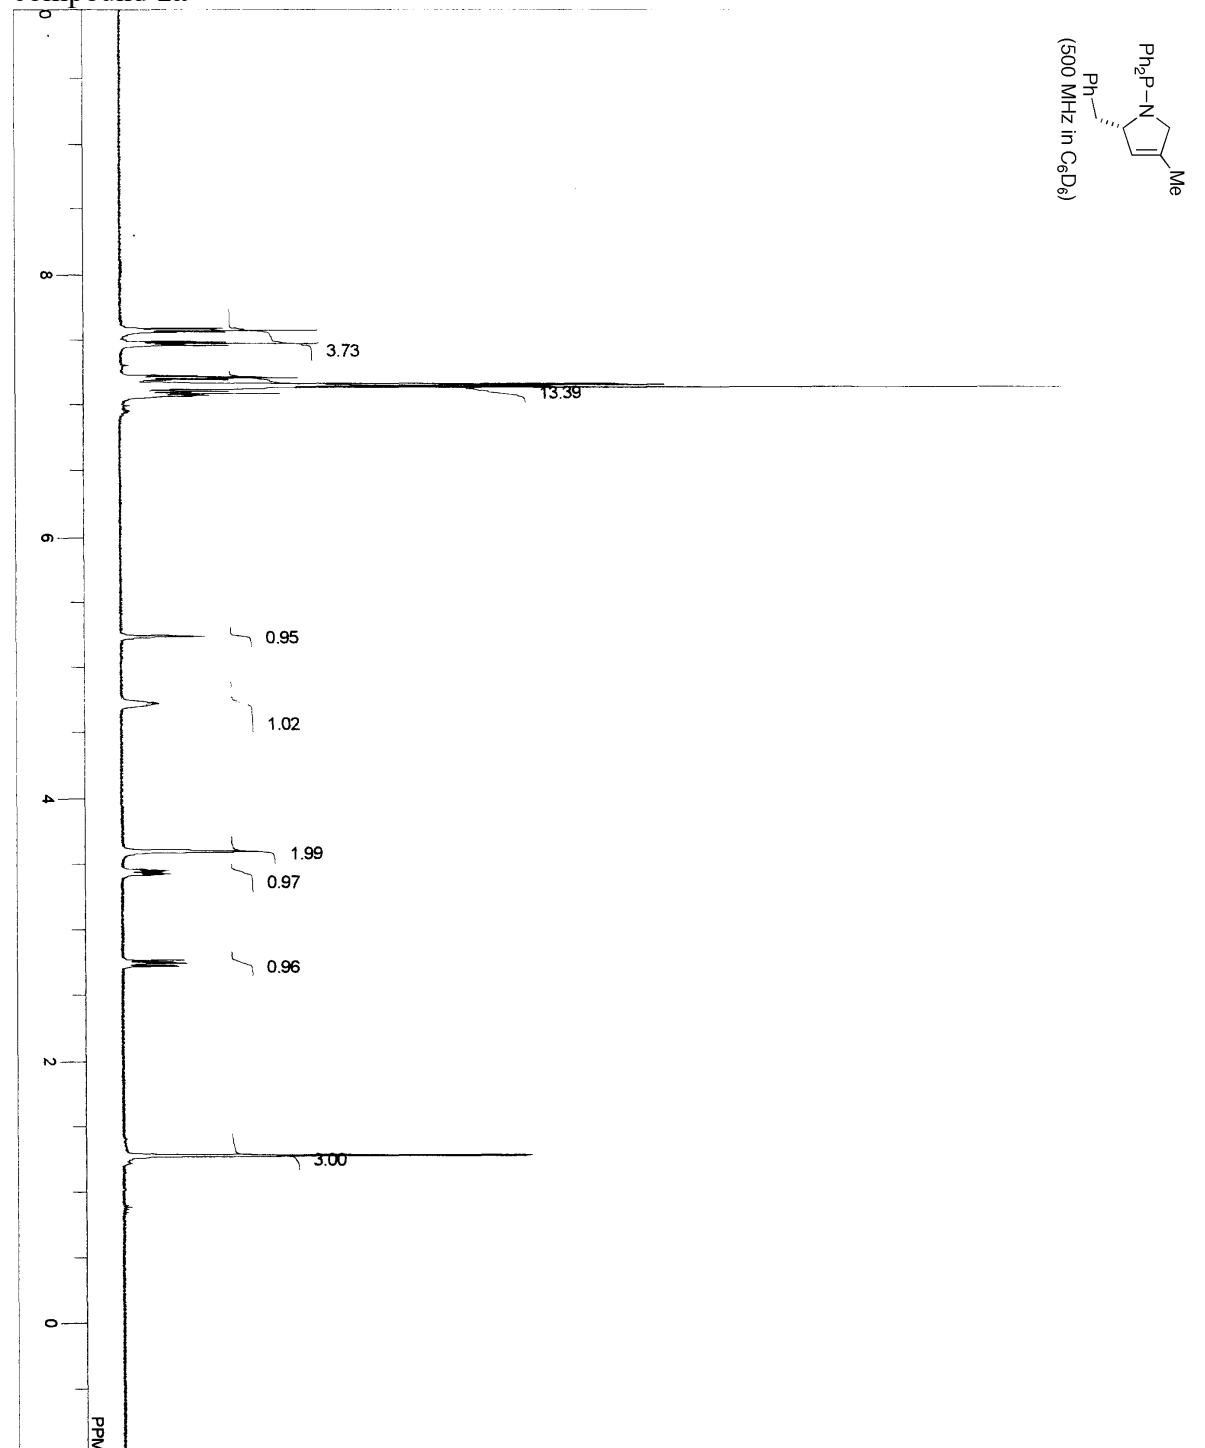

compound 1a

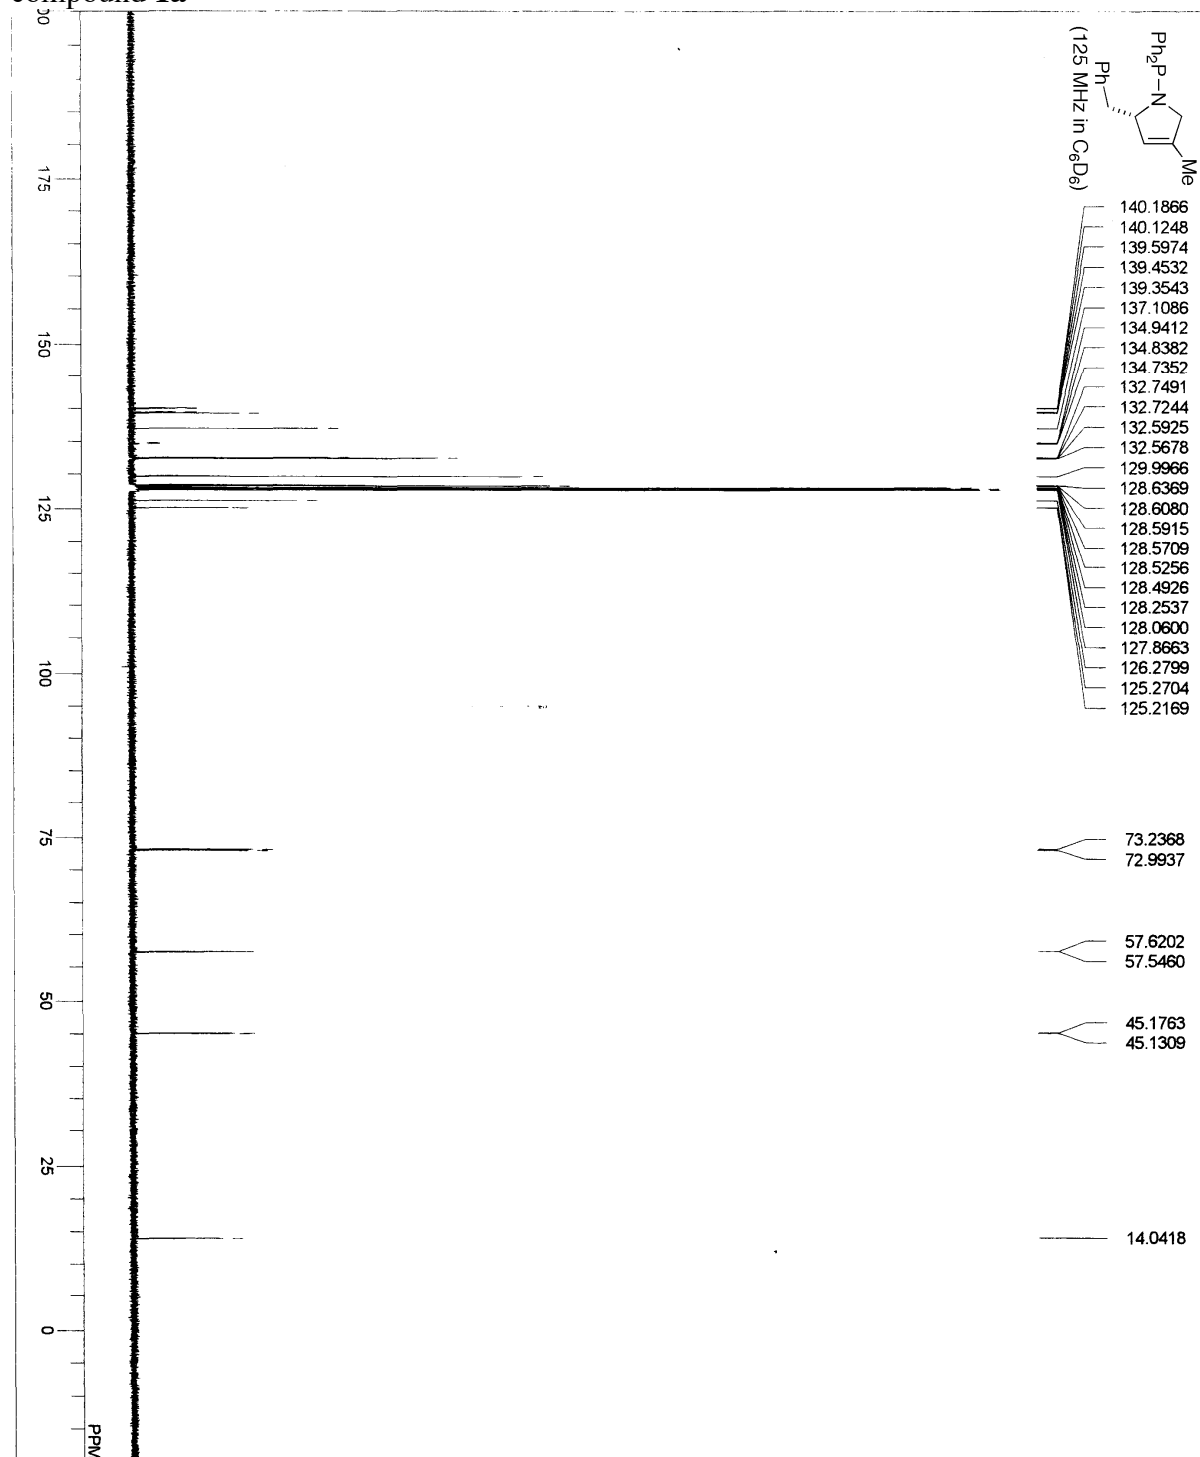

compound **1b**

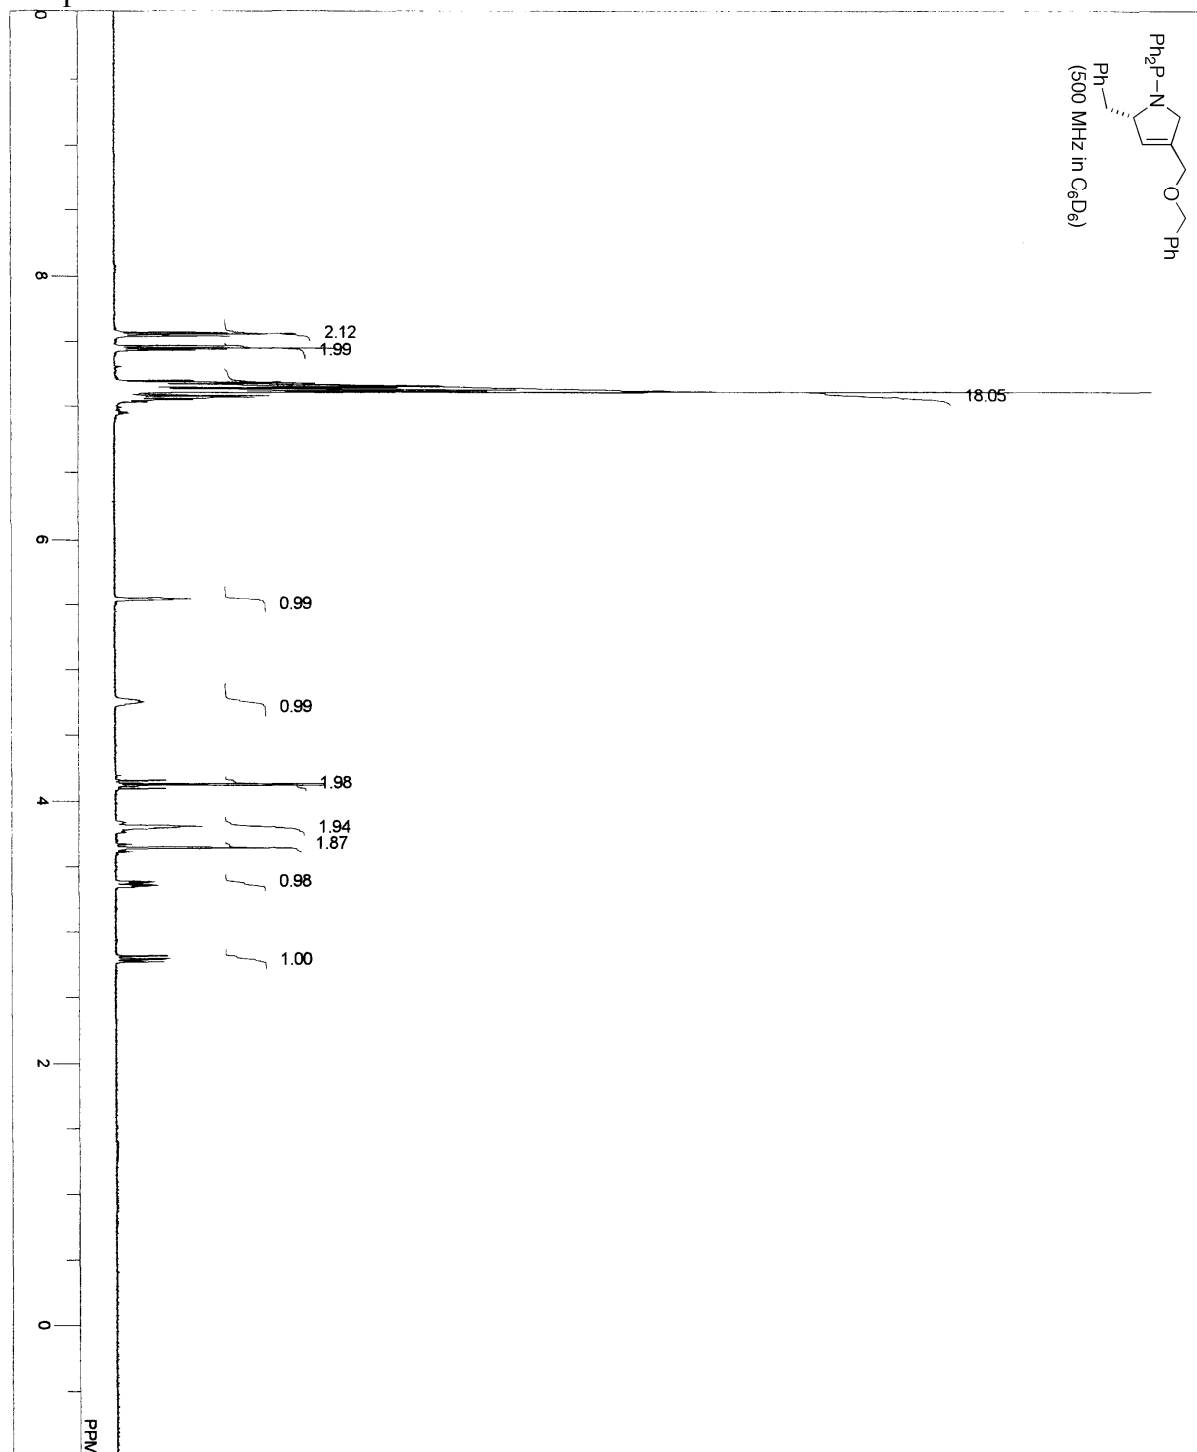

compound **1b**

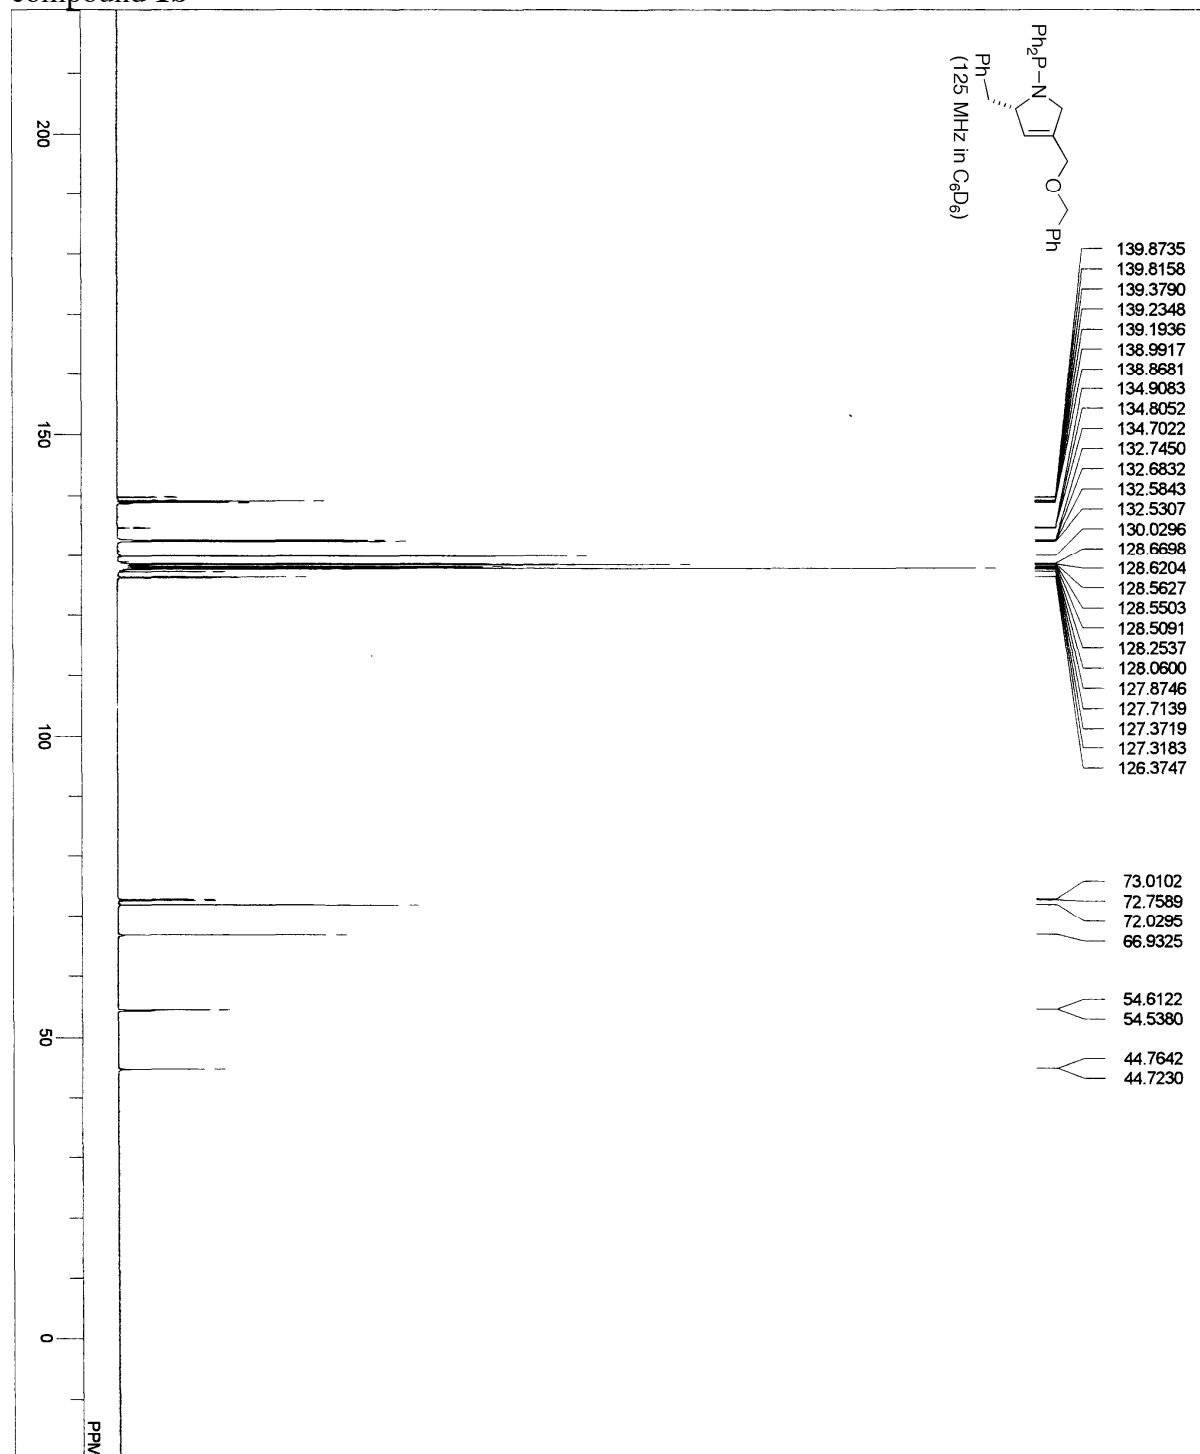

compound **1c**

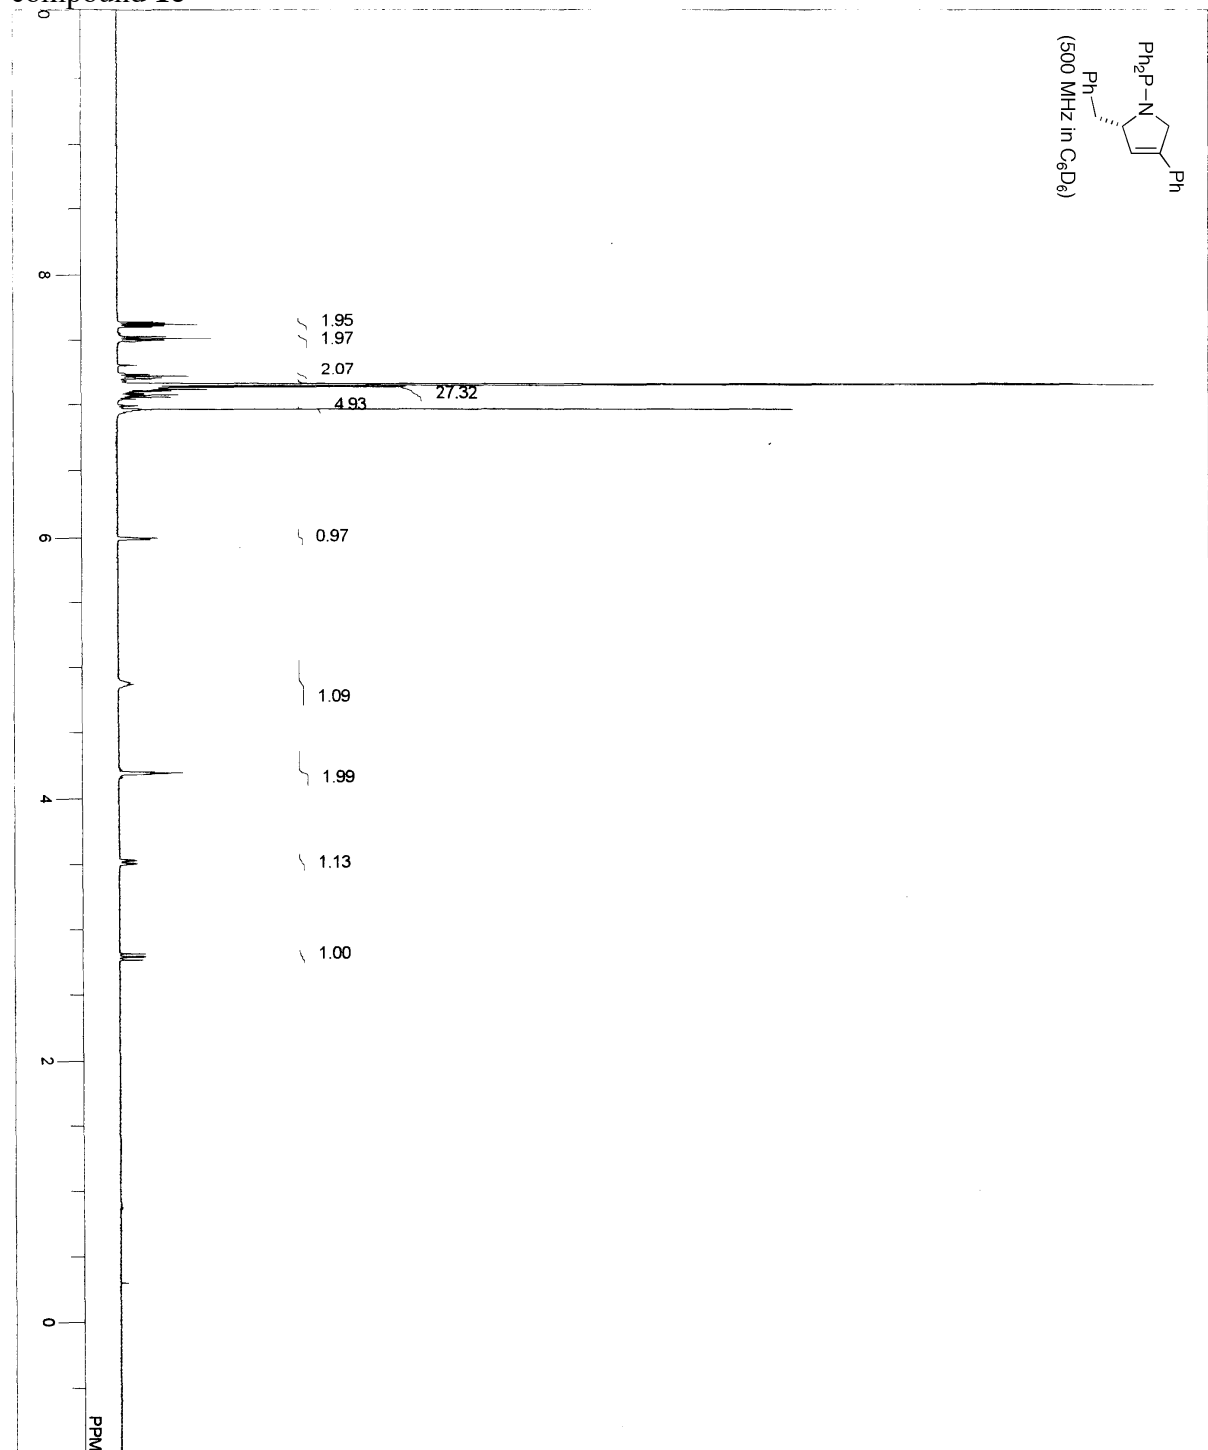

compound **1c**

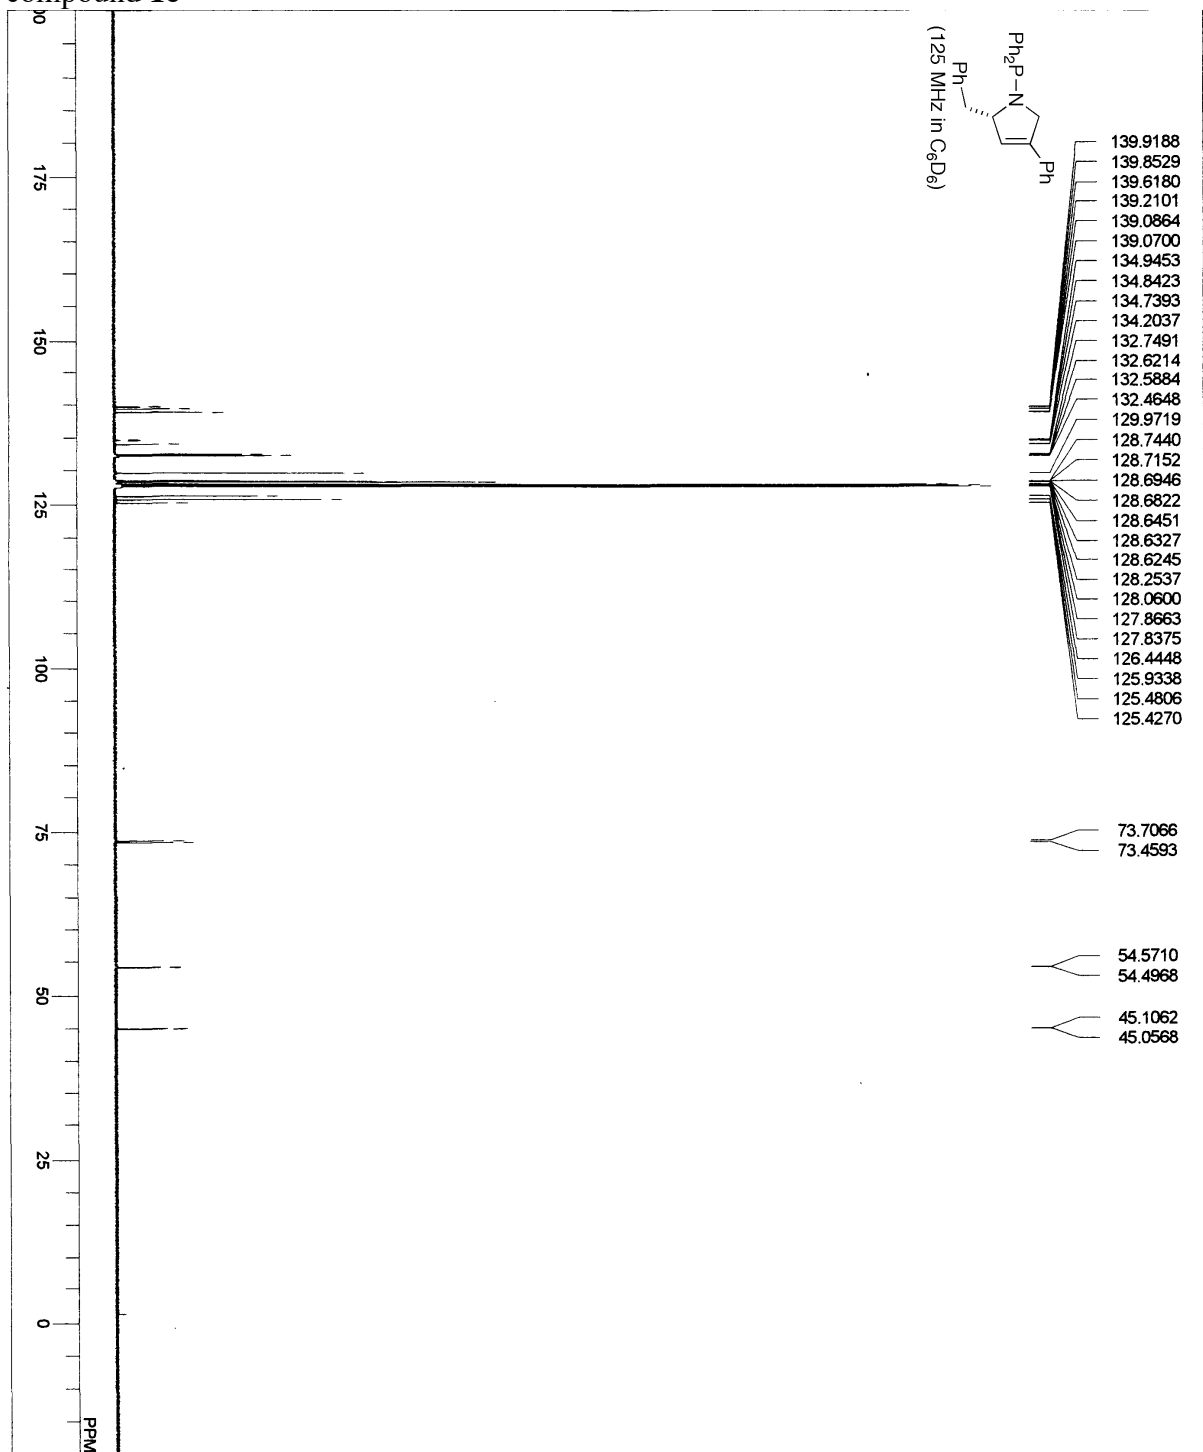



Rh(acac)(**1a**)

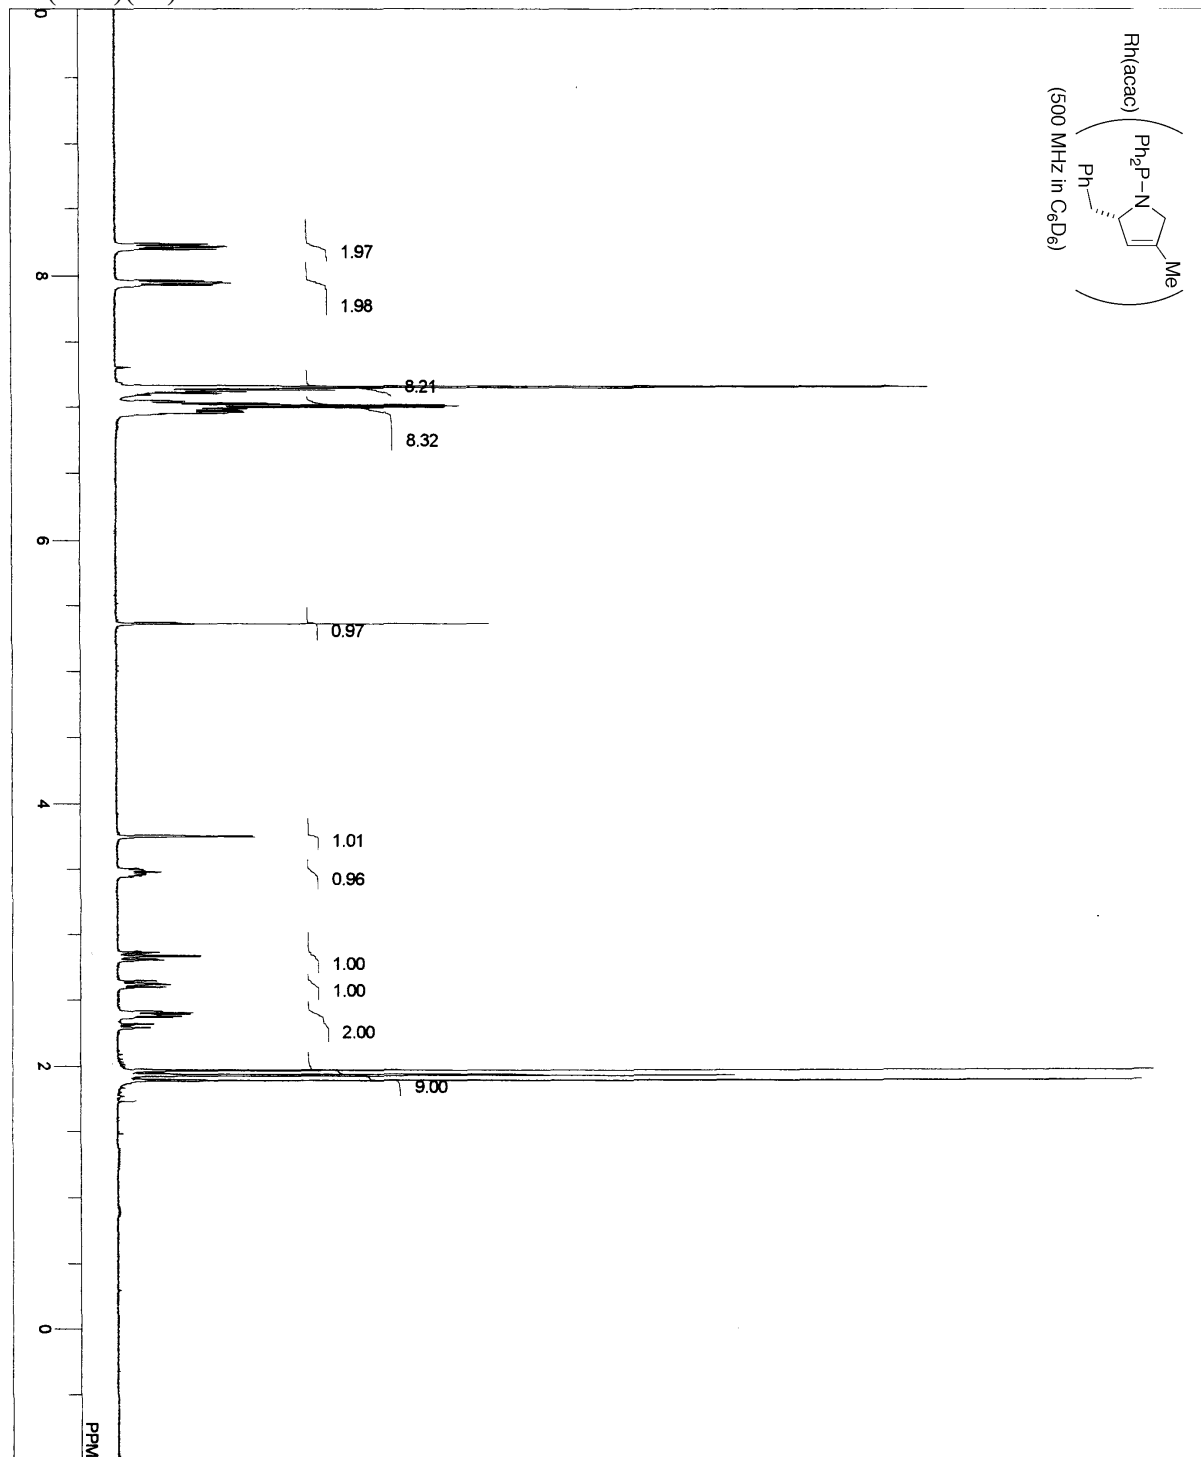

compound **6a**

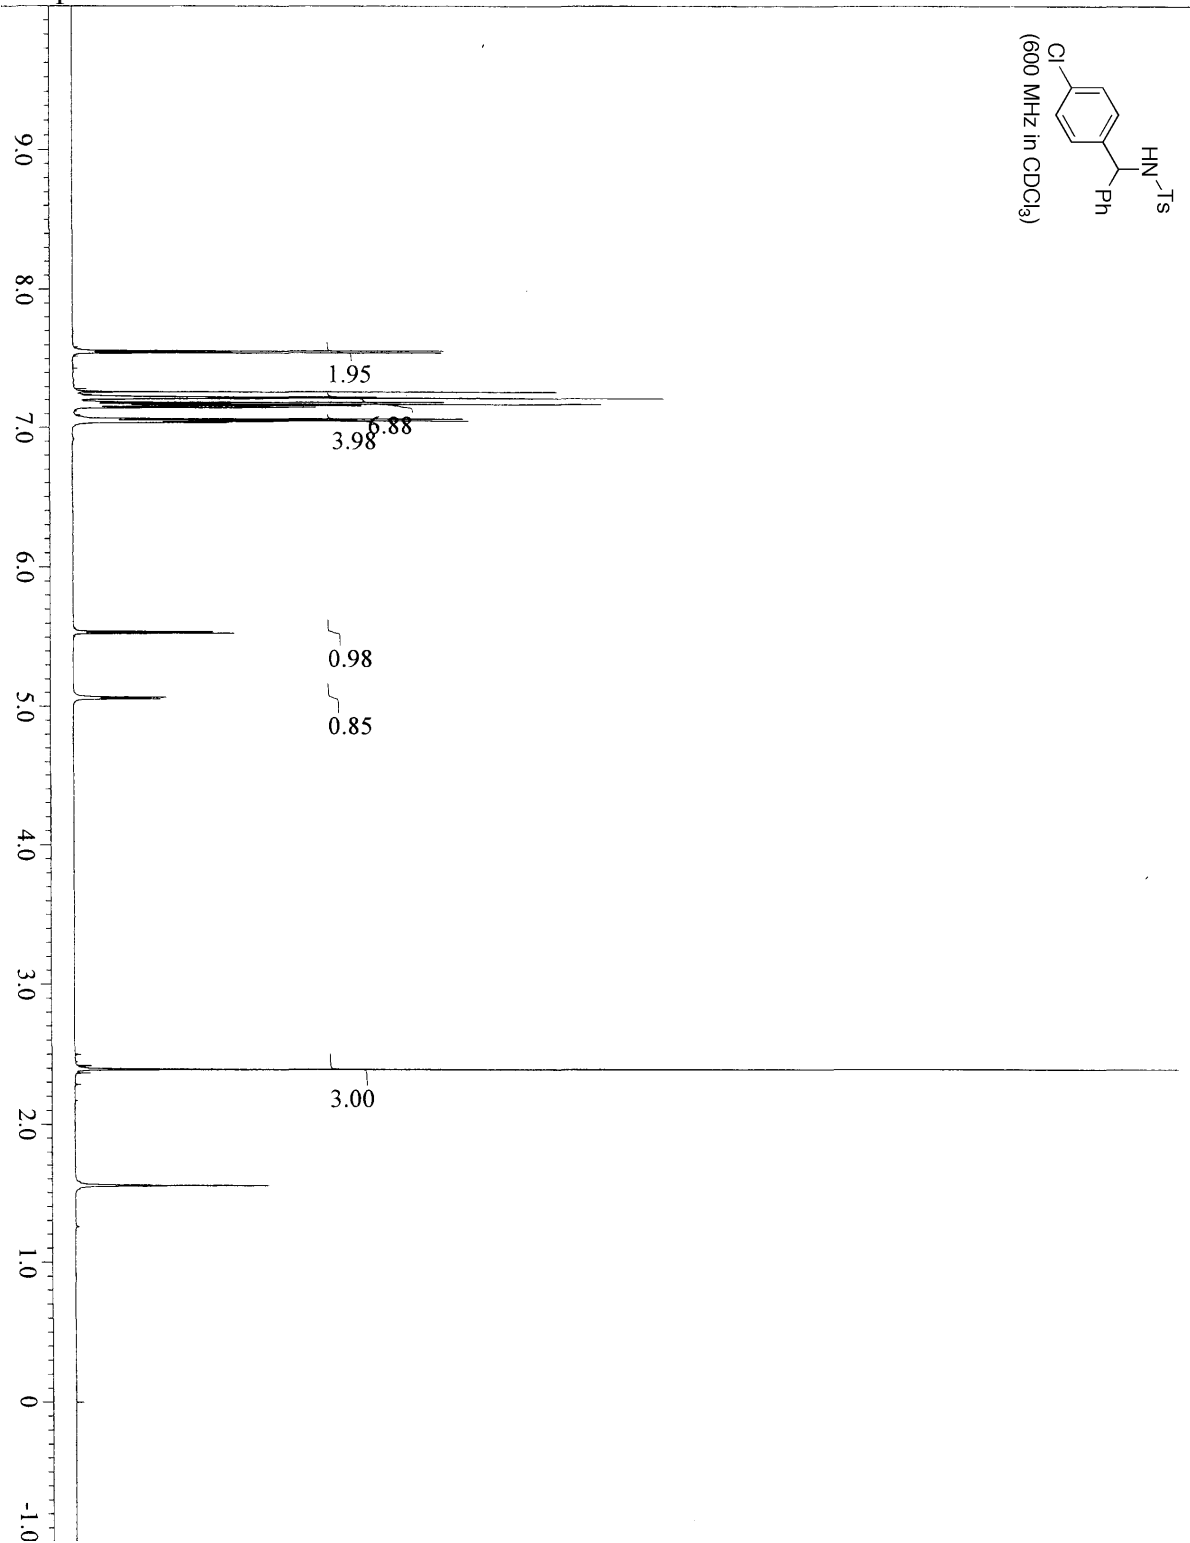

compound 6a

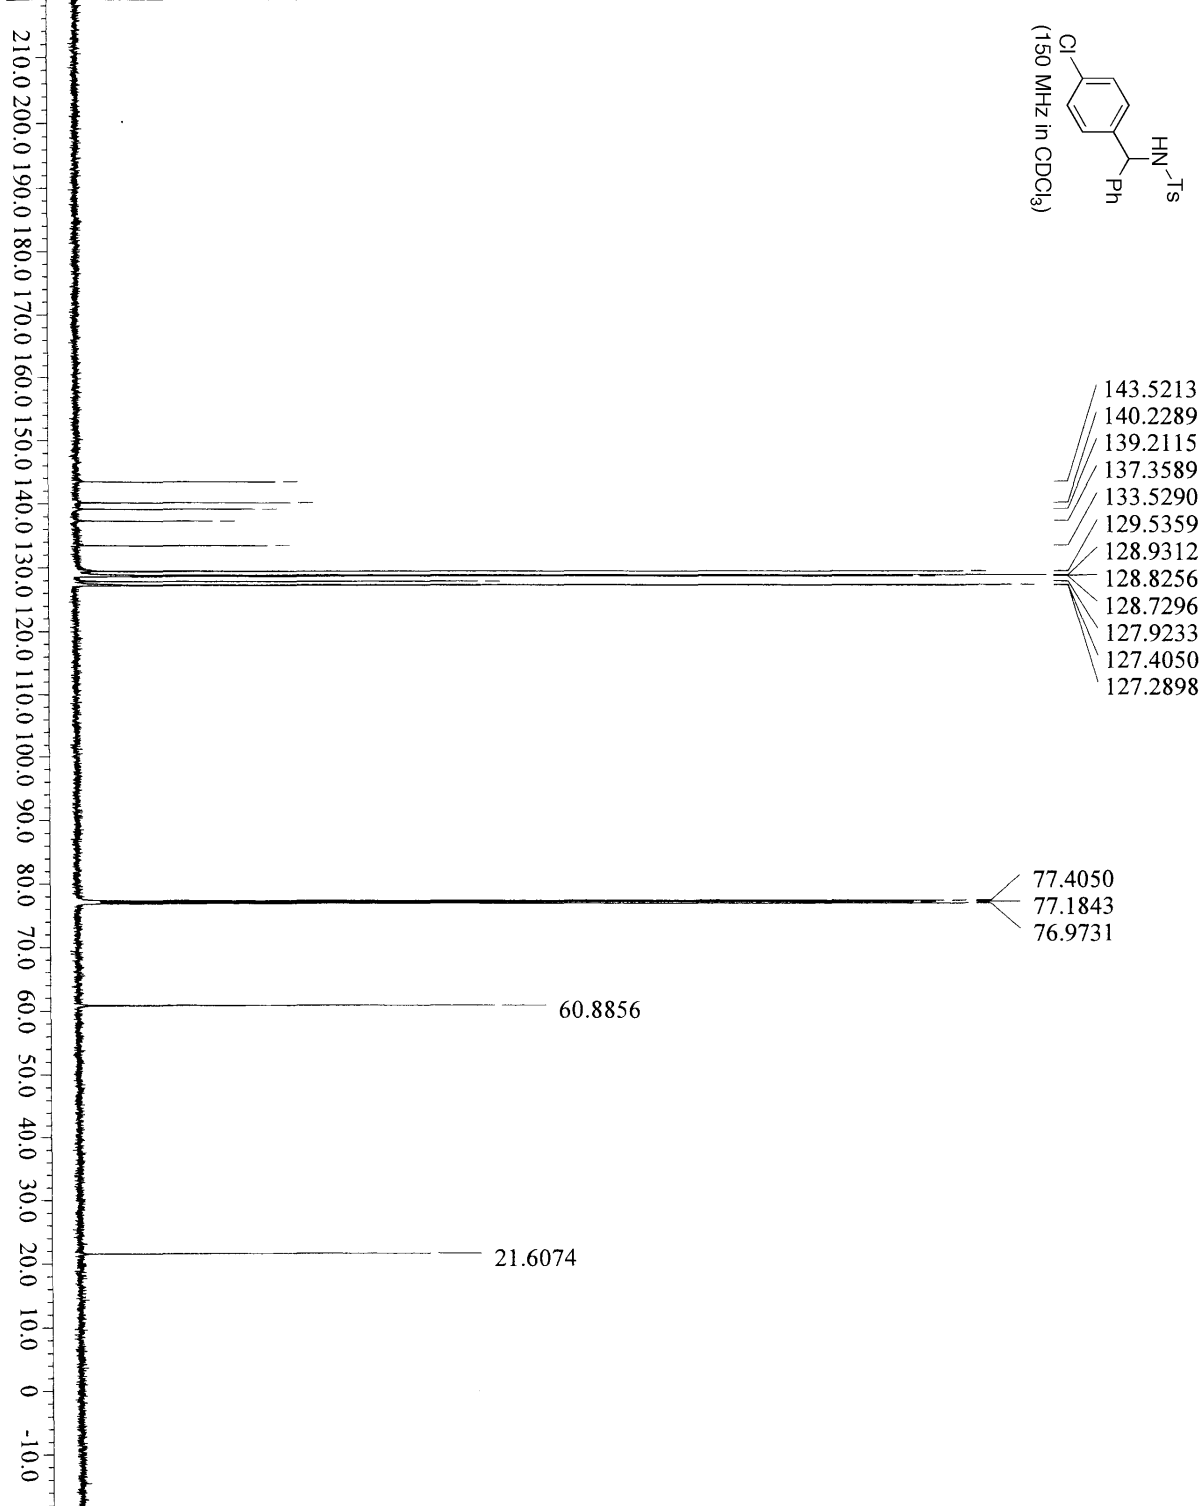

compound **6b**

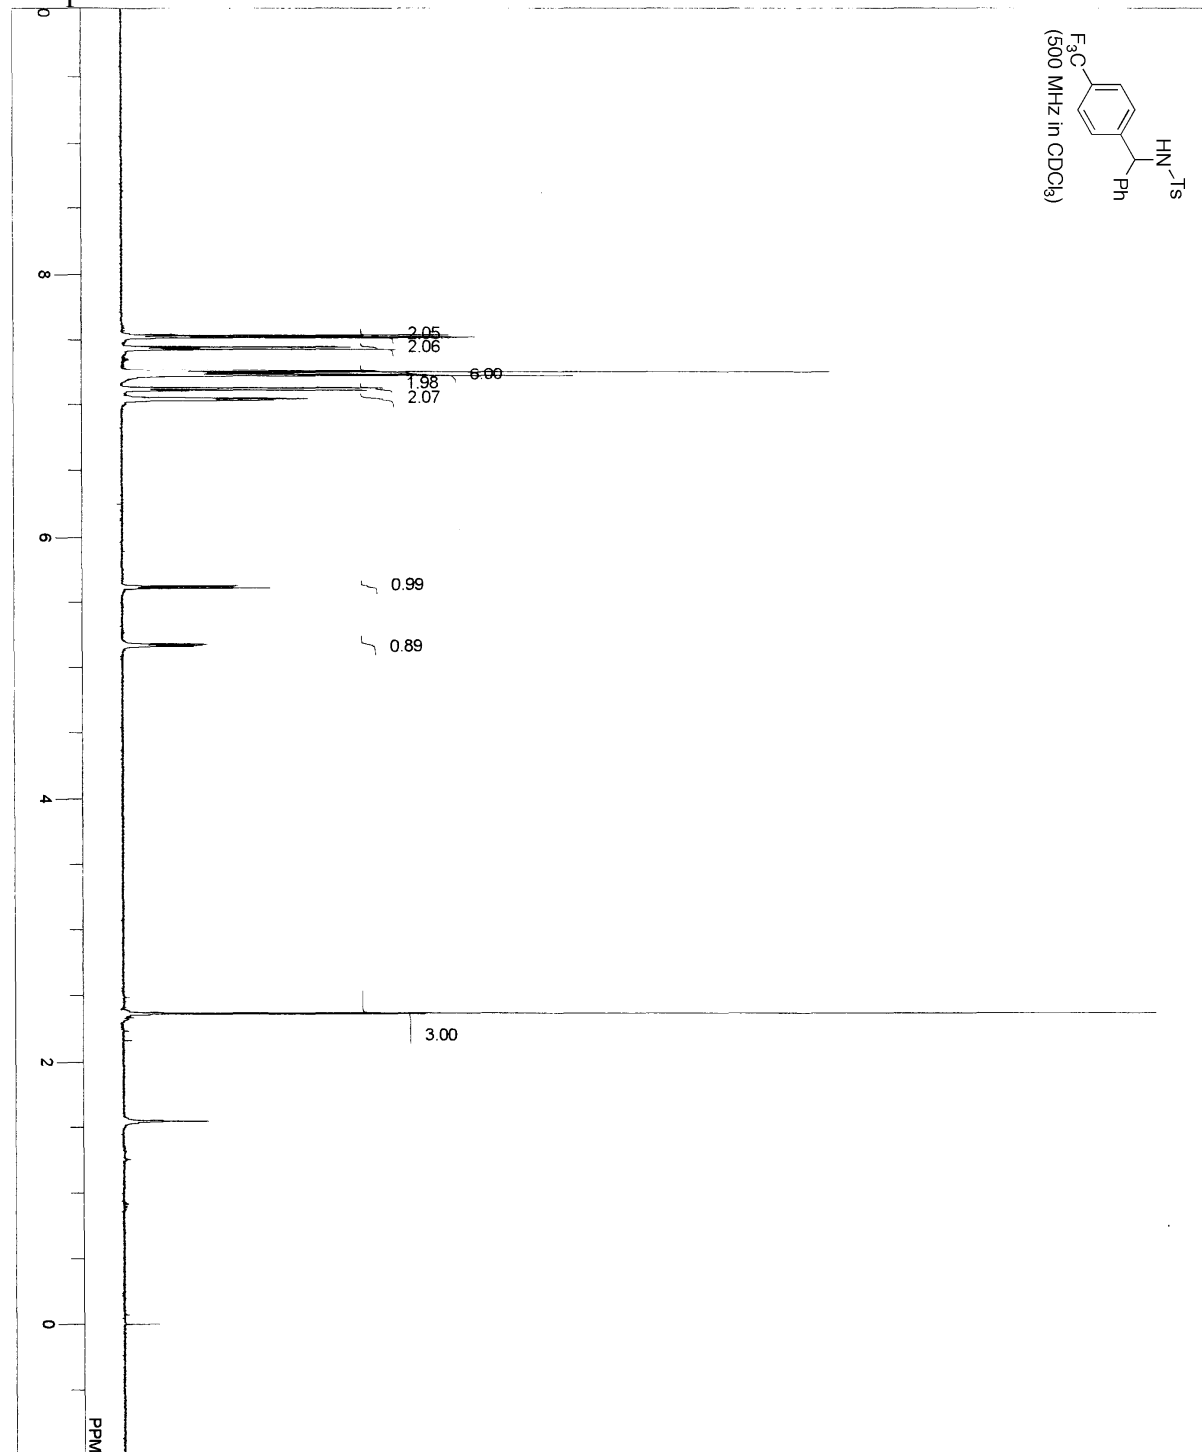

compound **6b**

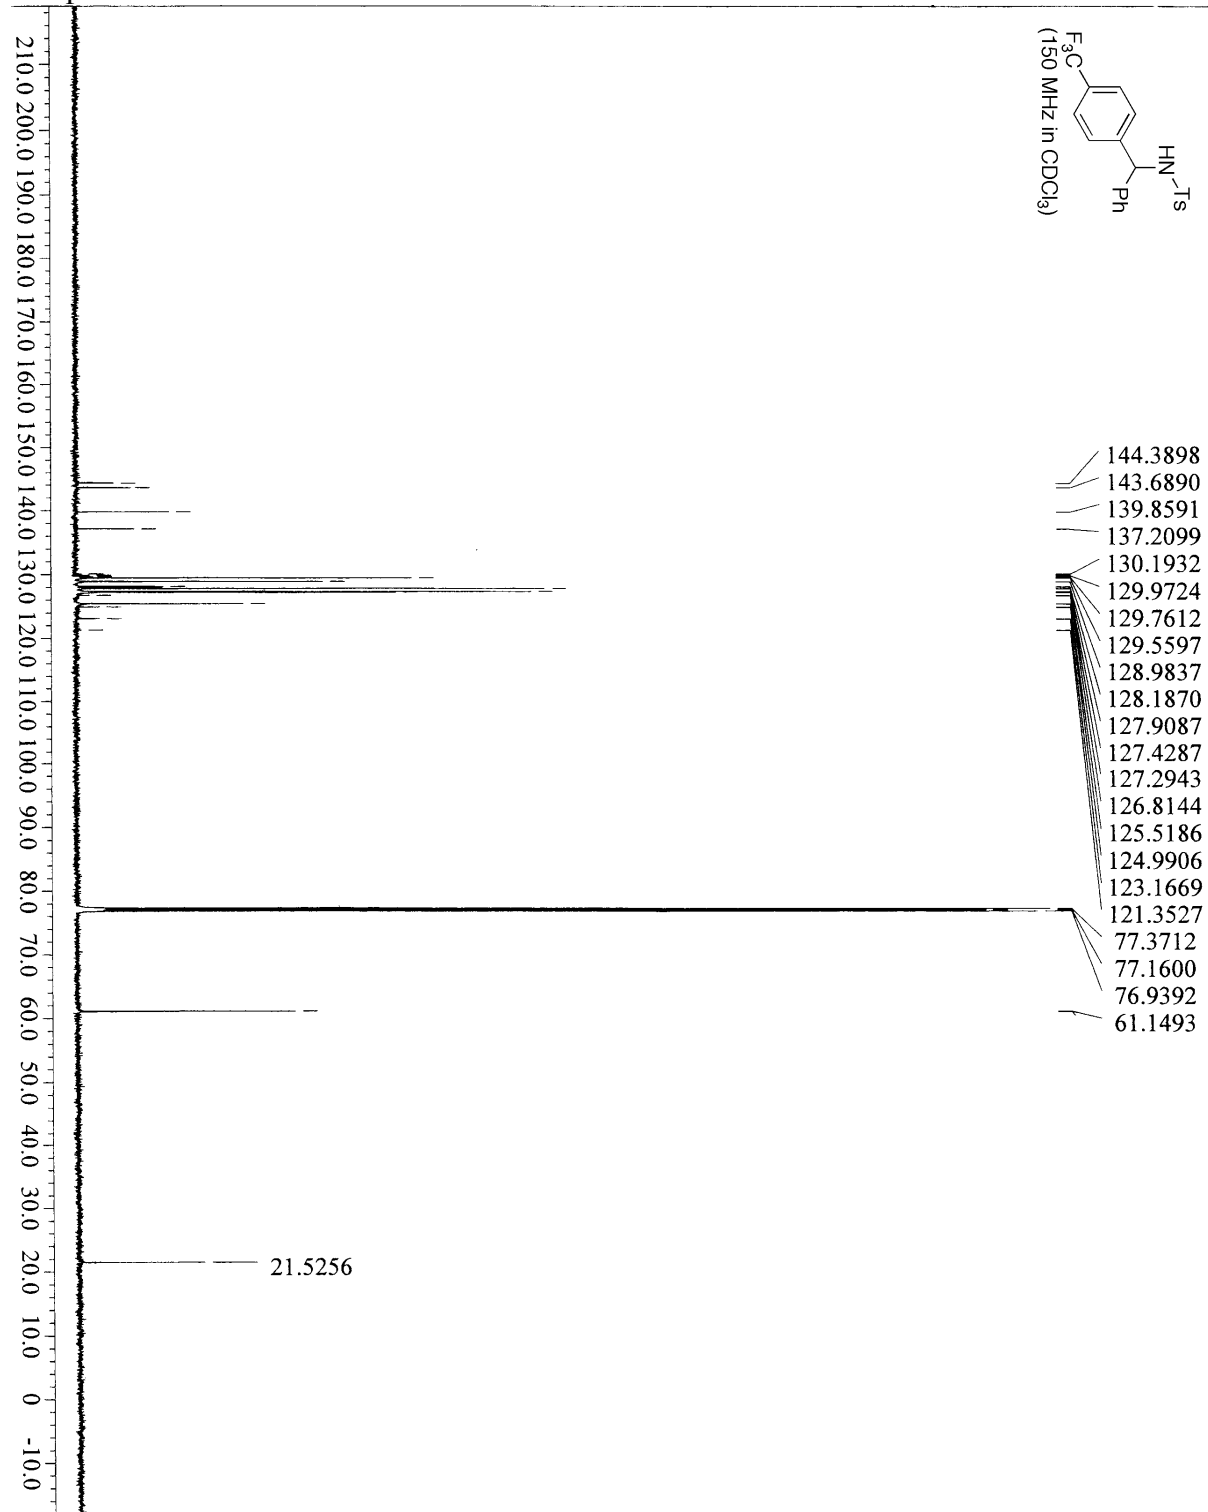

compound **6c**

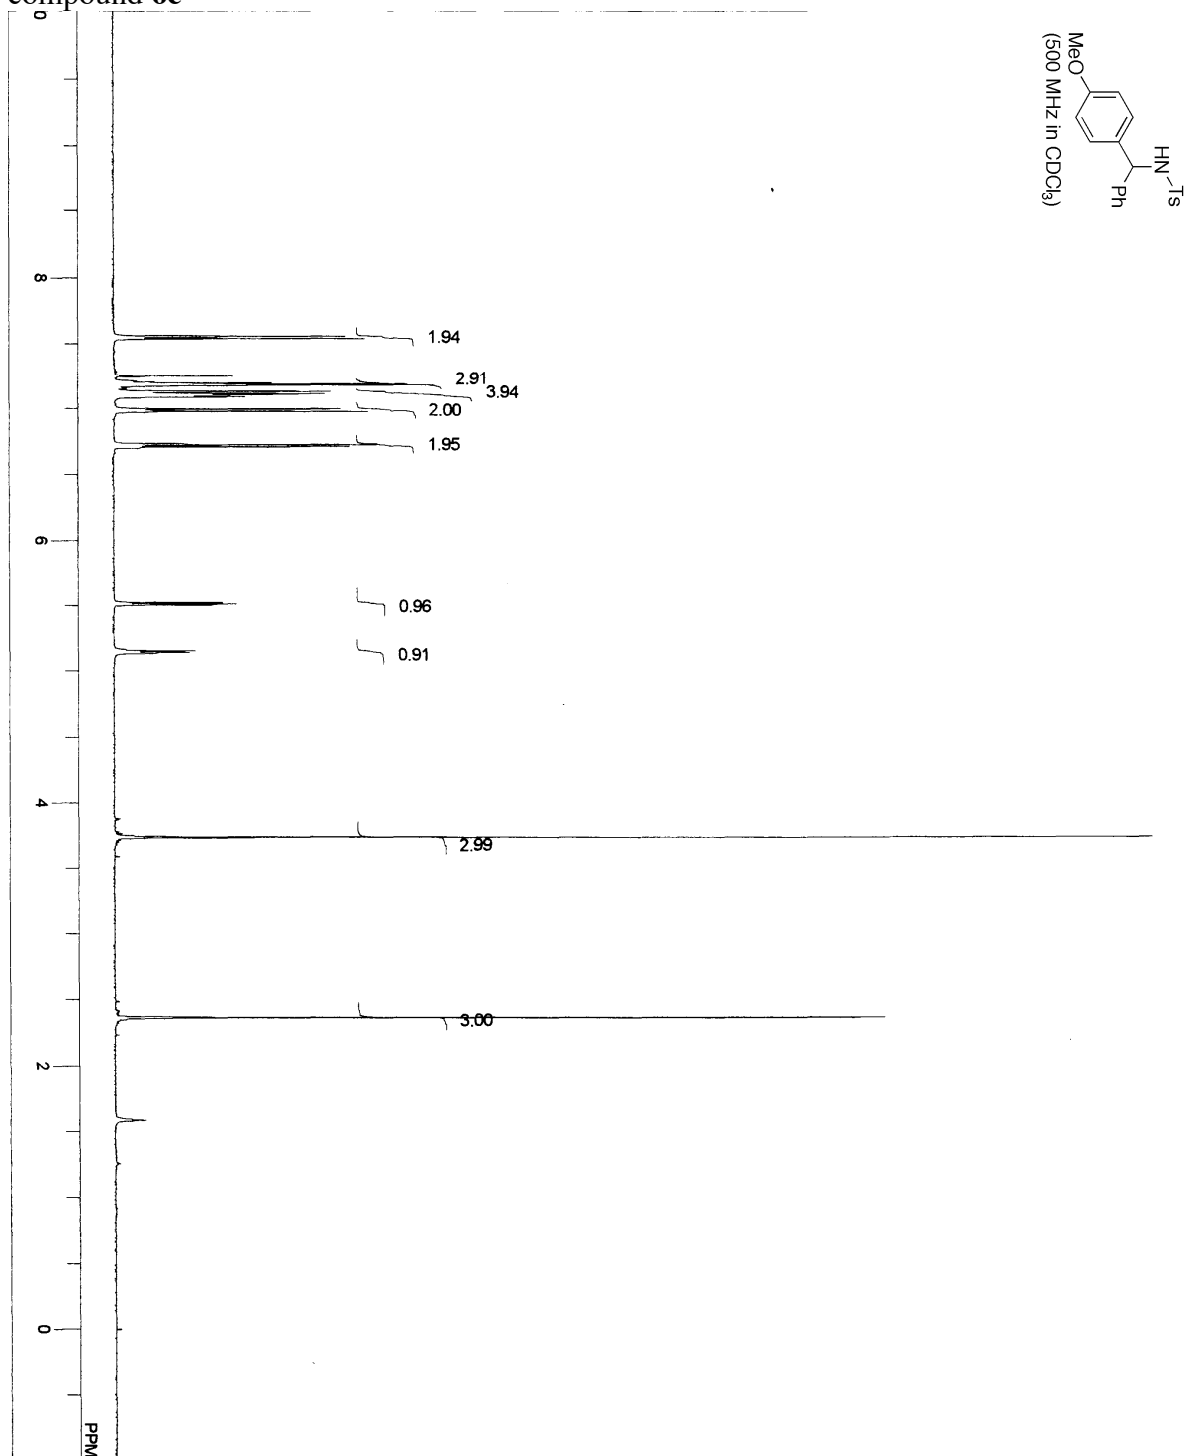

compound **6c**

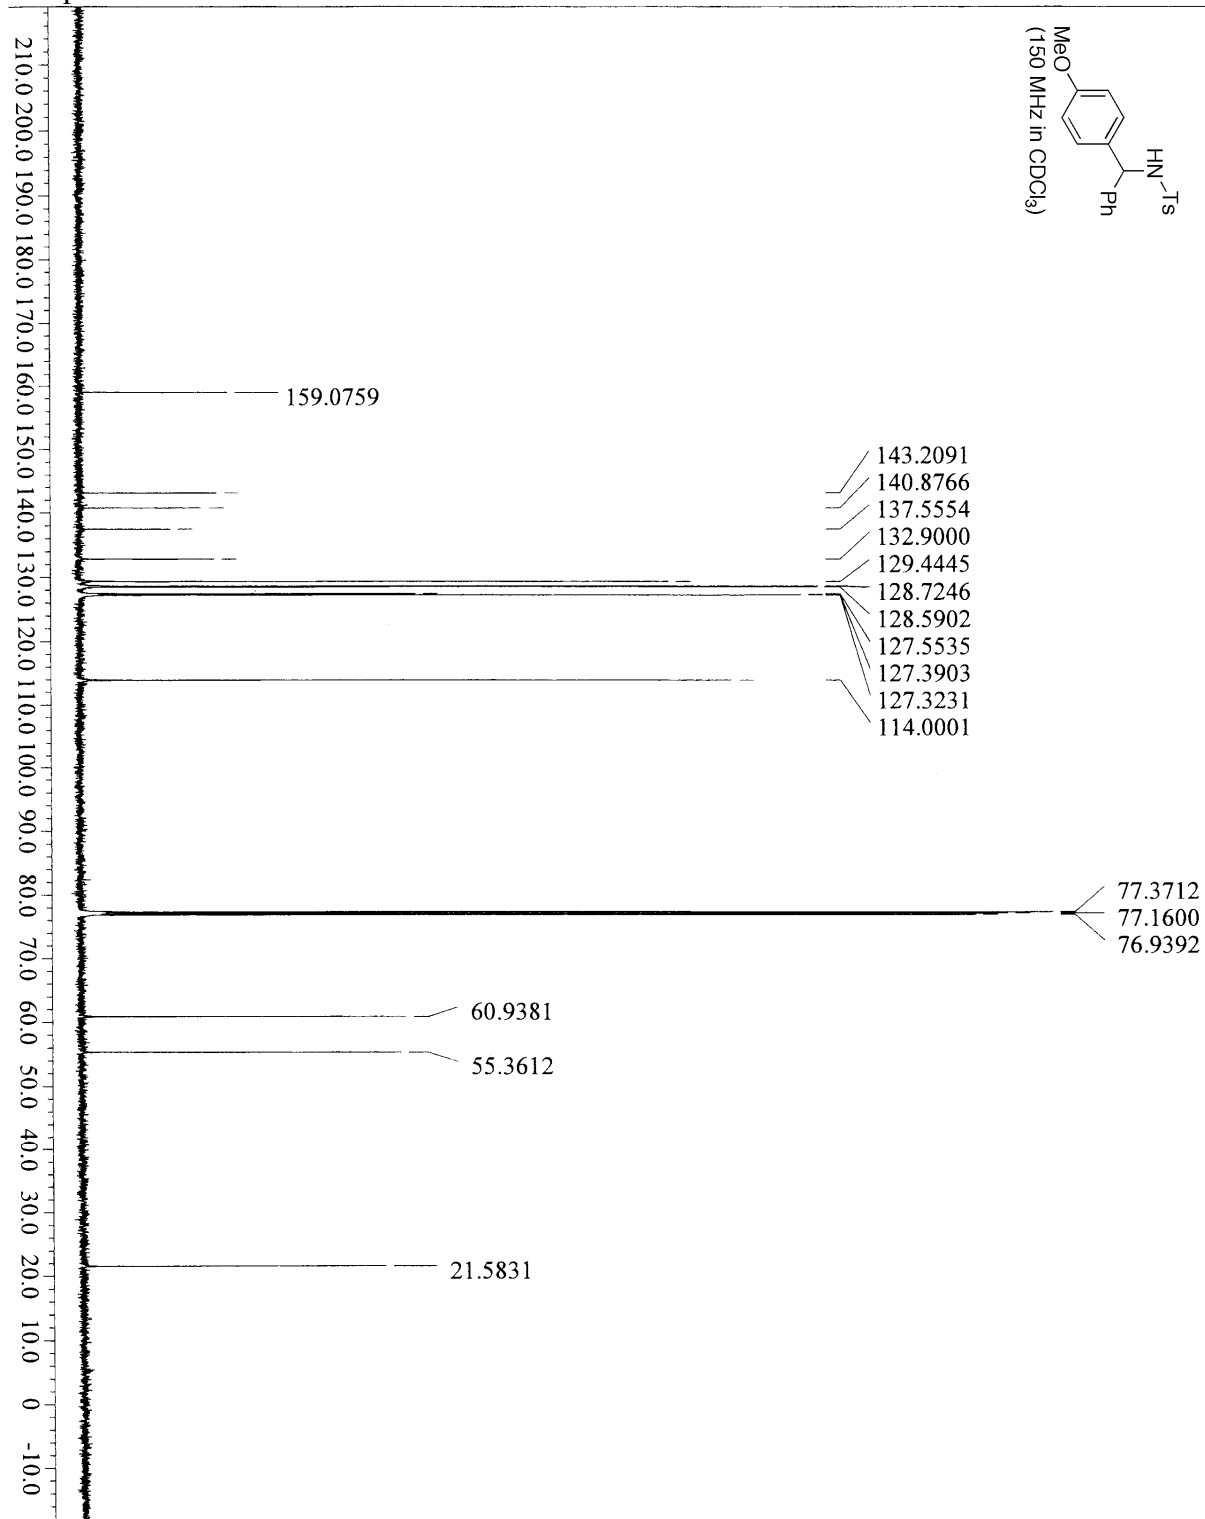

compound **6d**

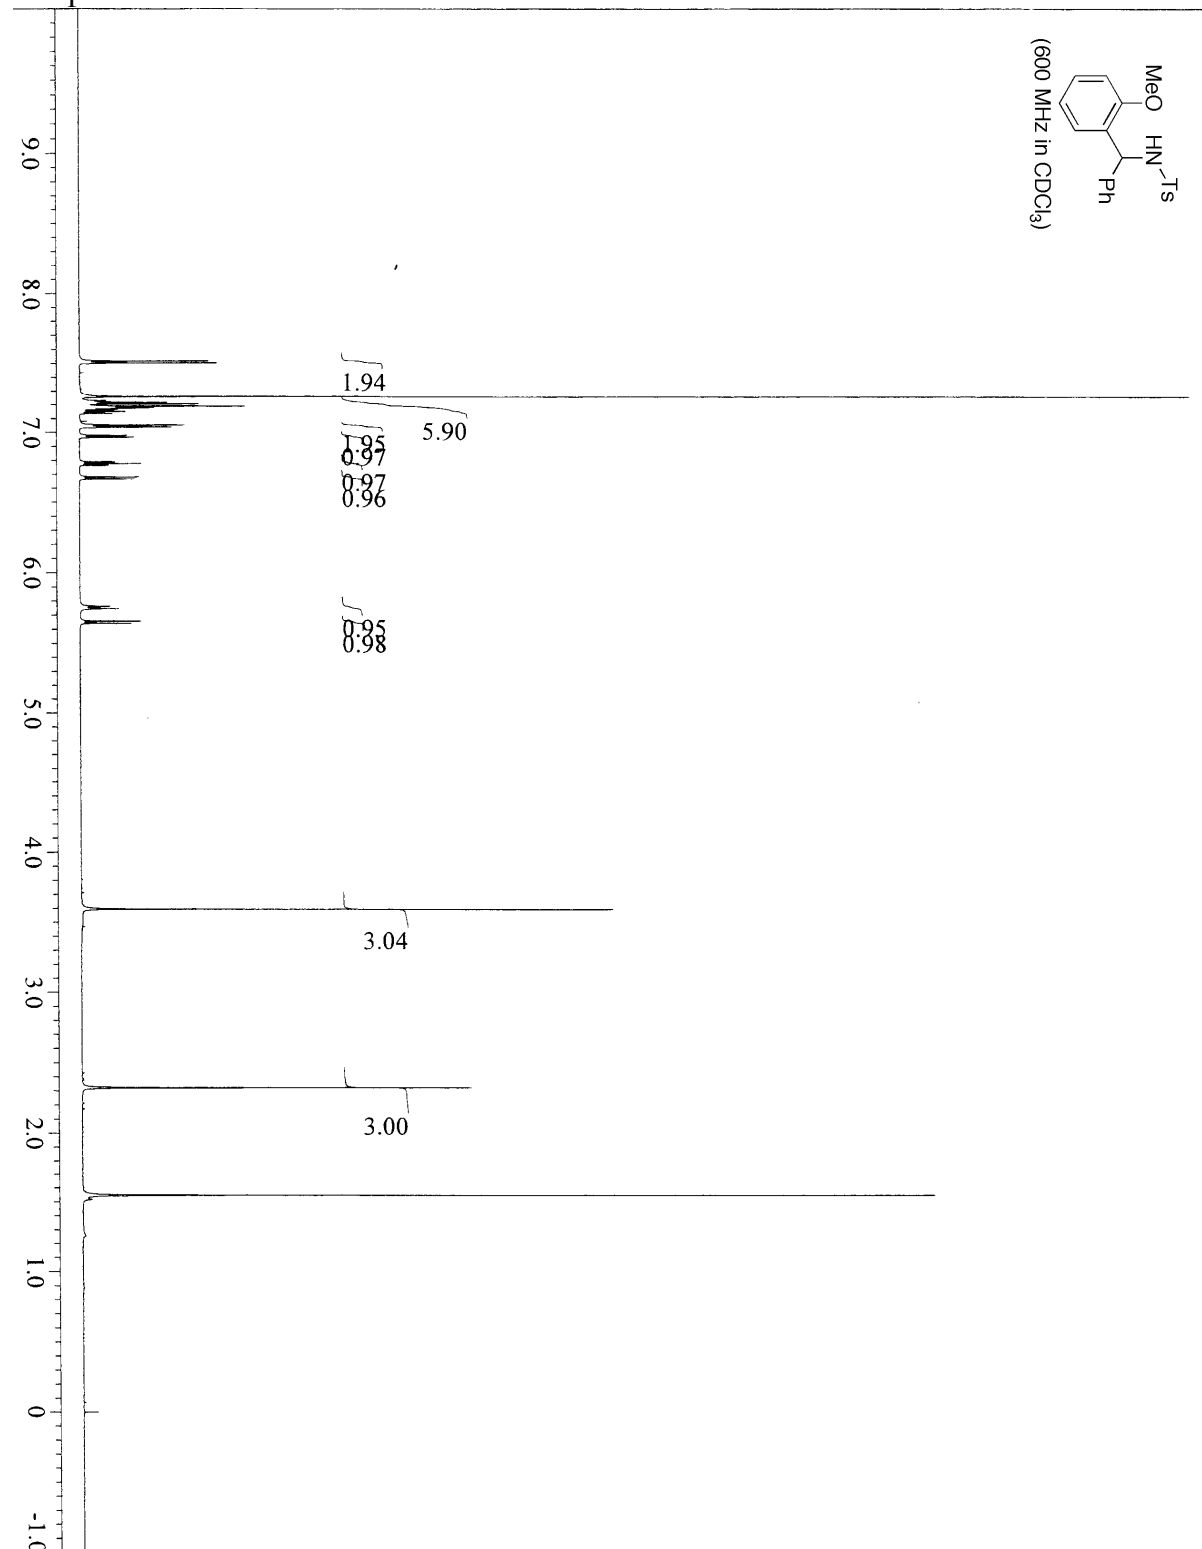



compound **6d**

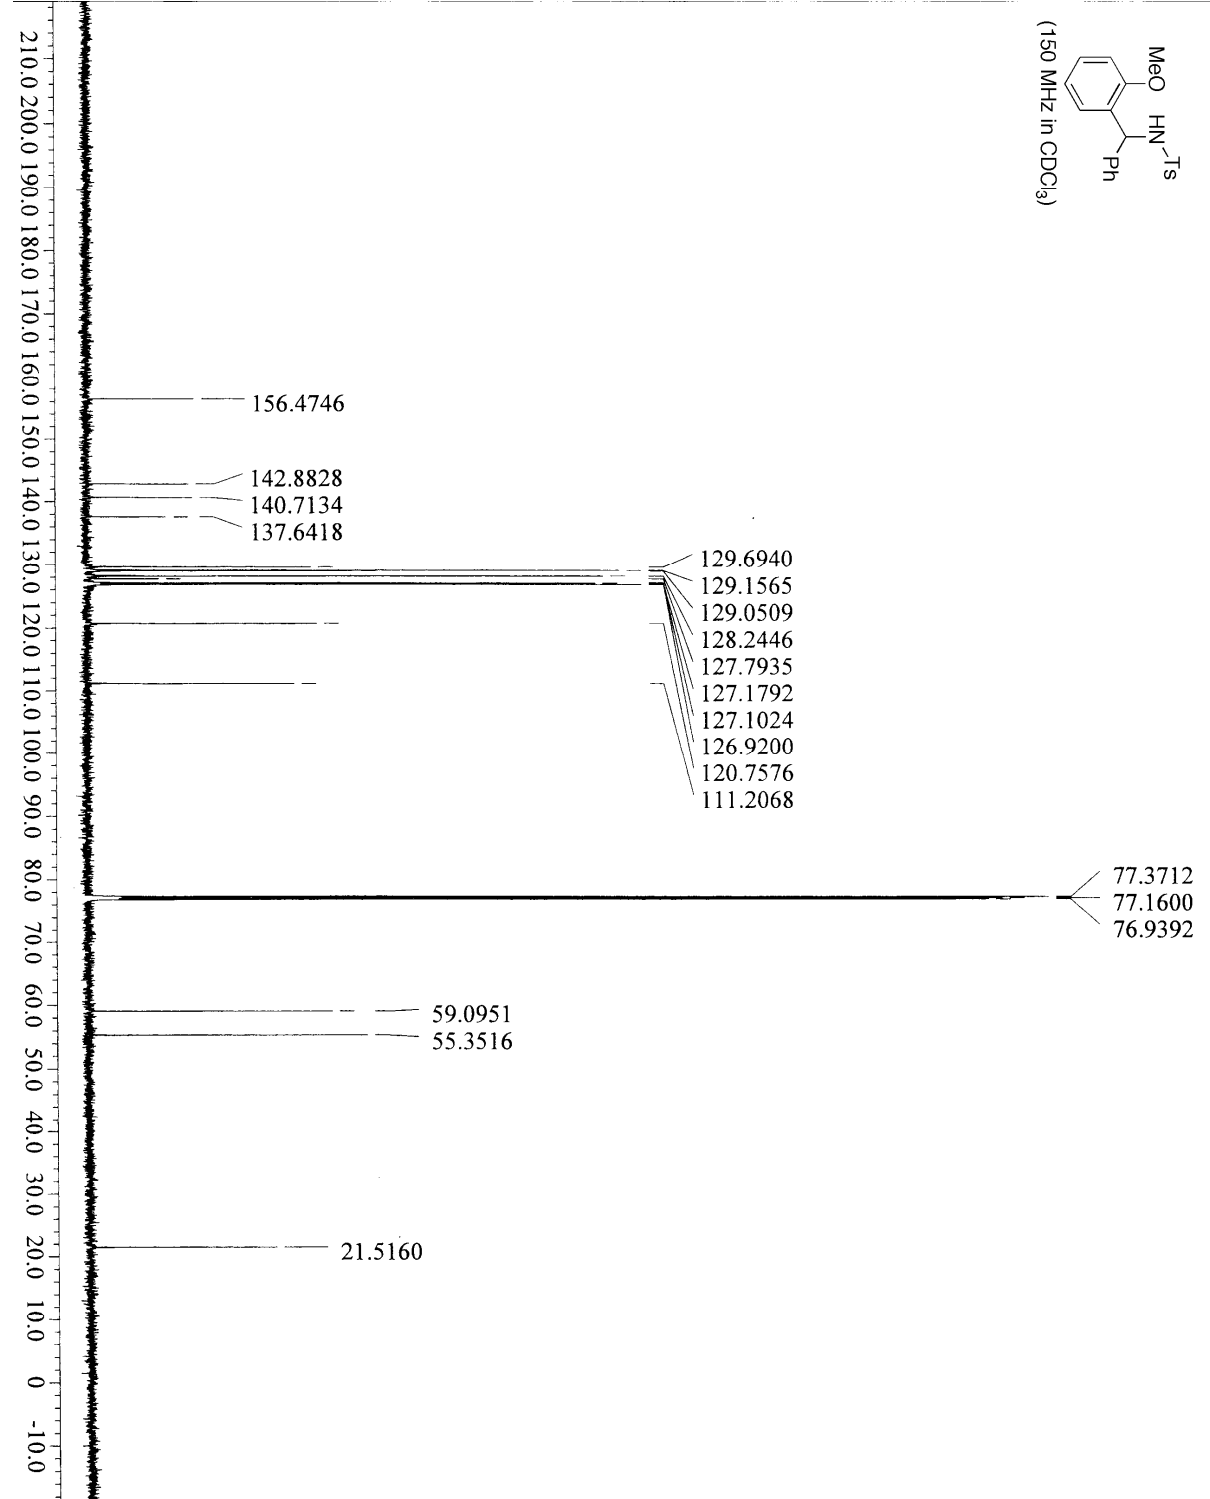

compound **6e**

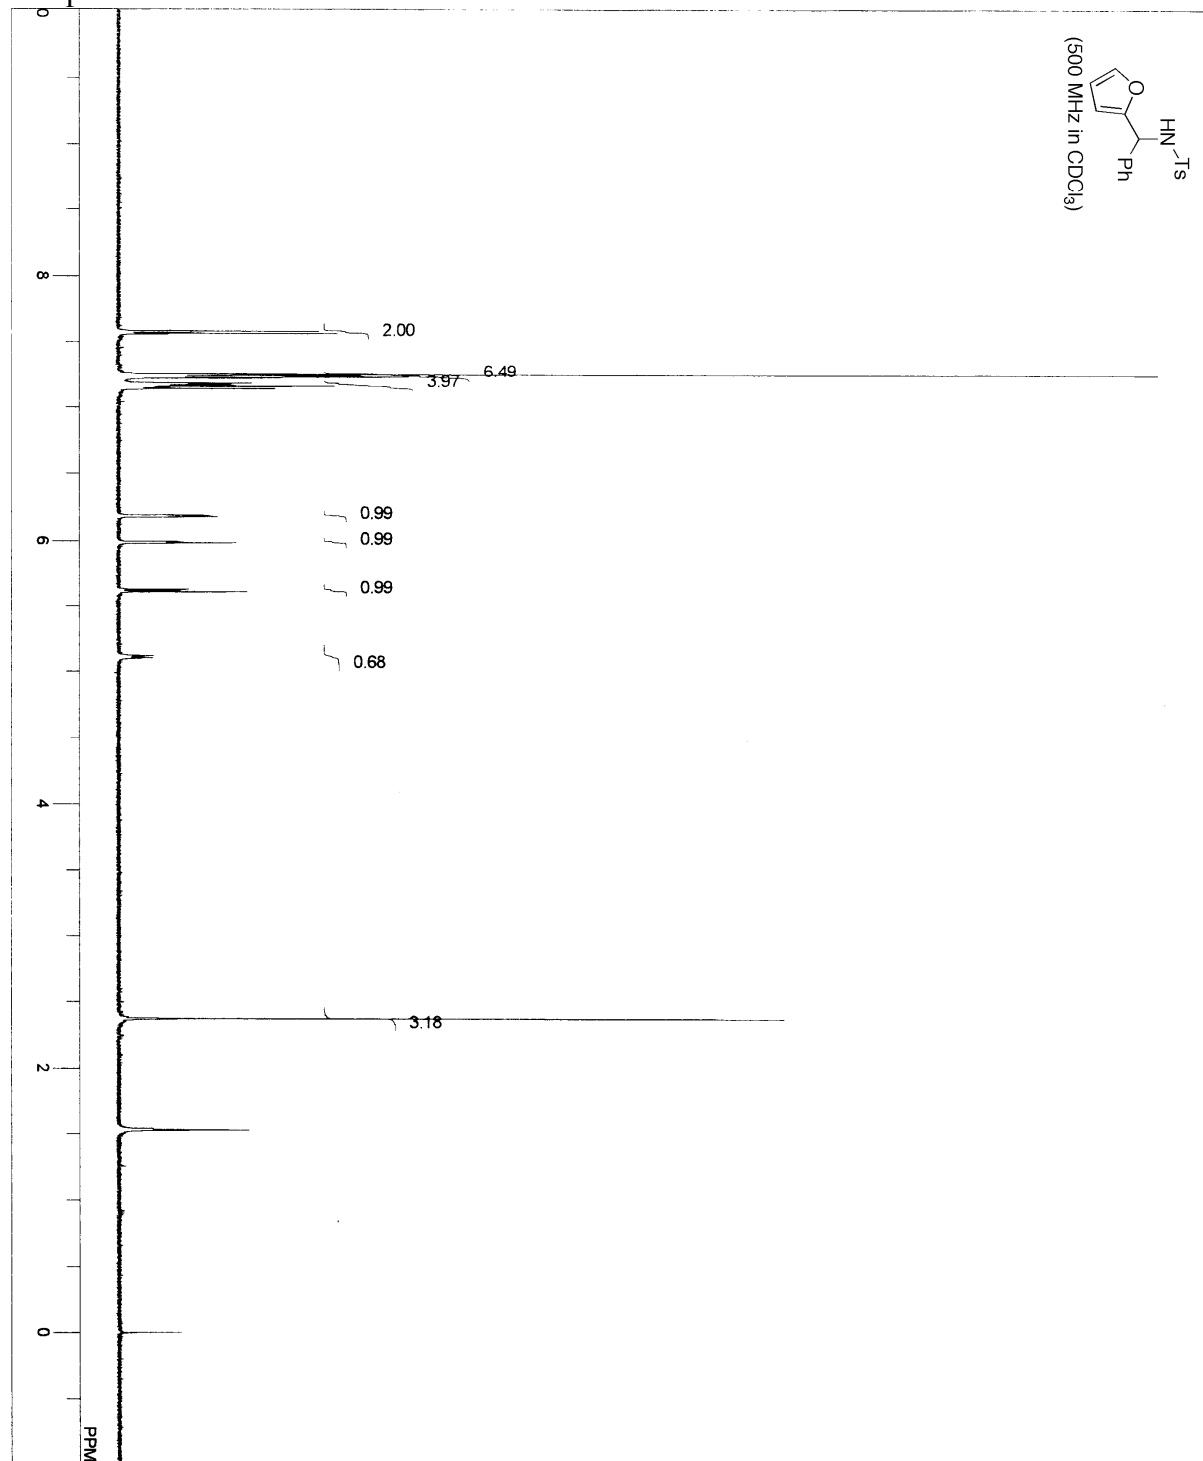

compound 6e

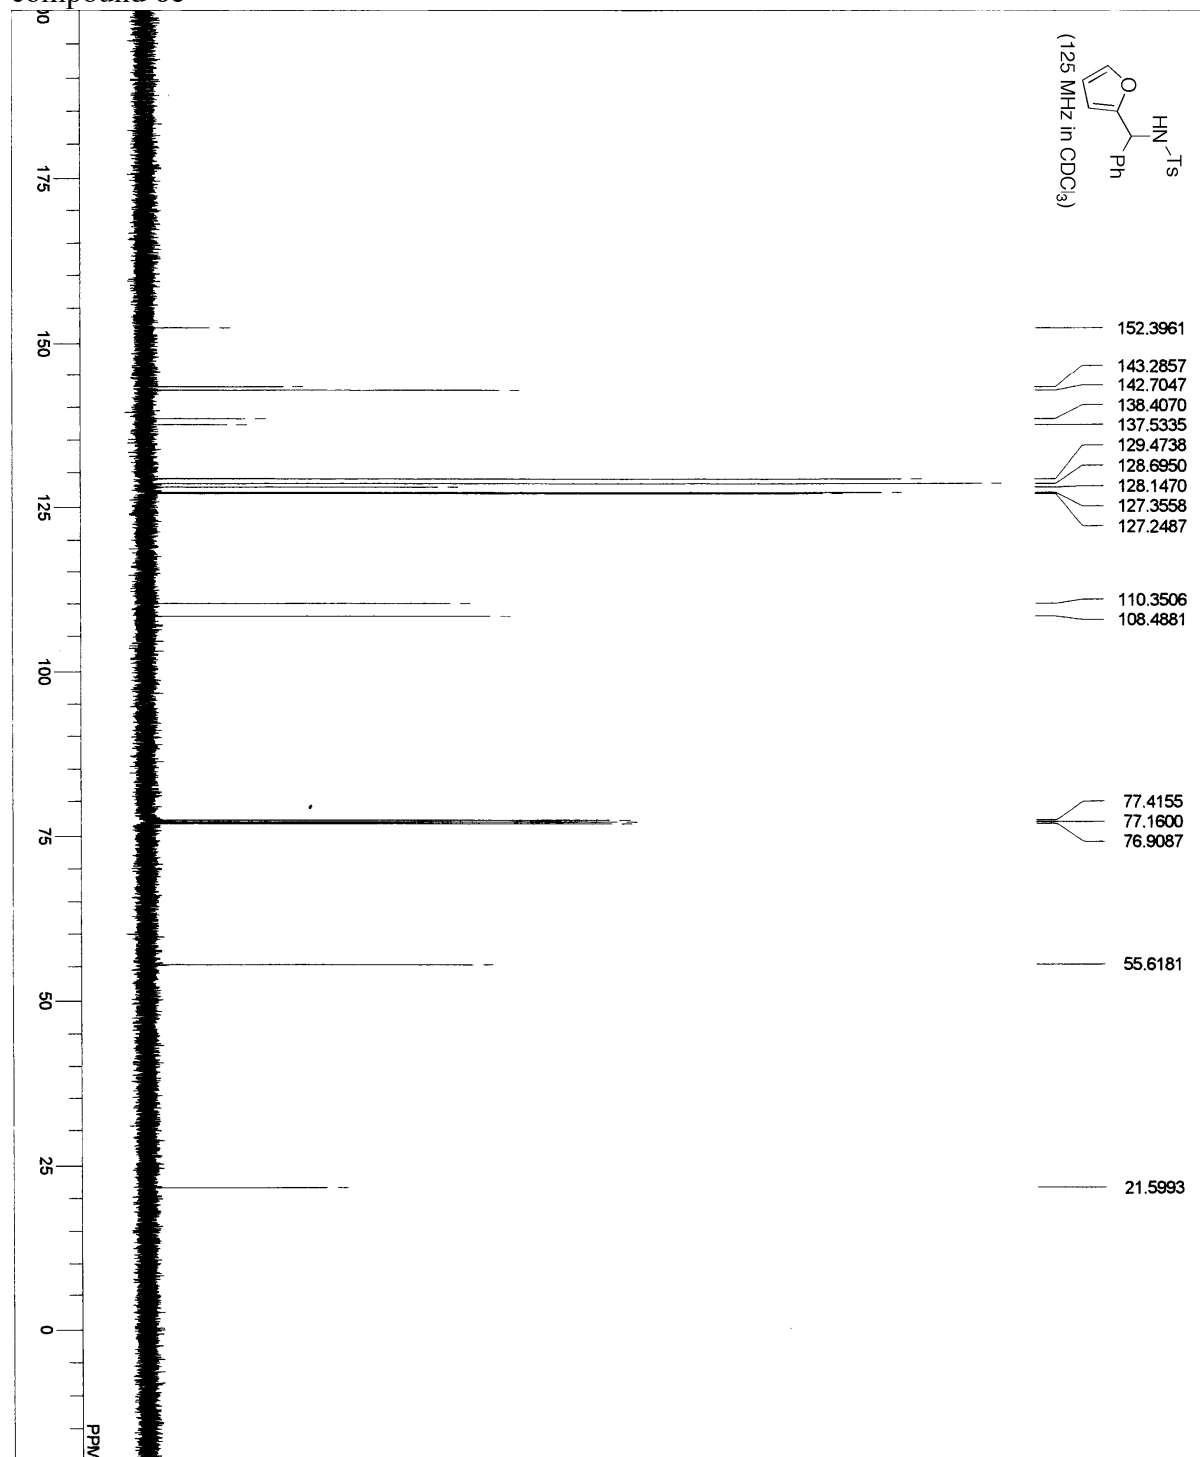

compound **6f**

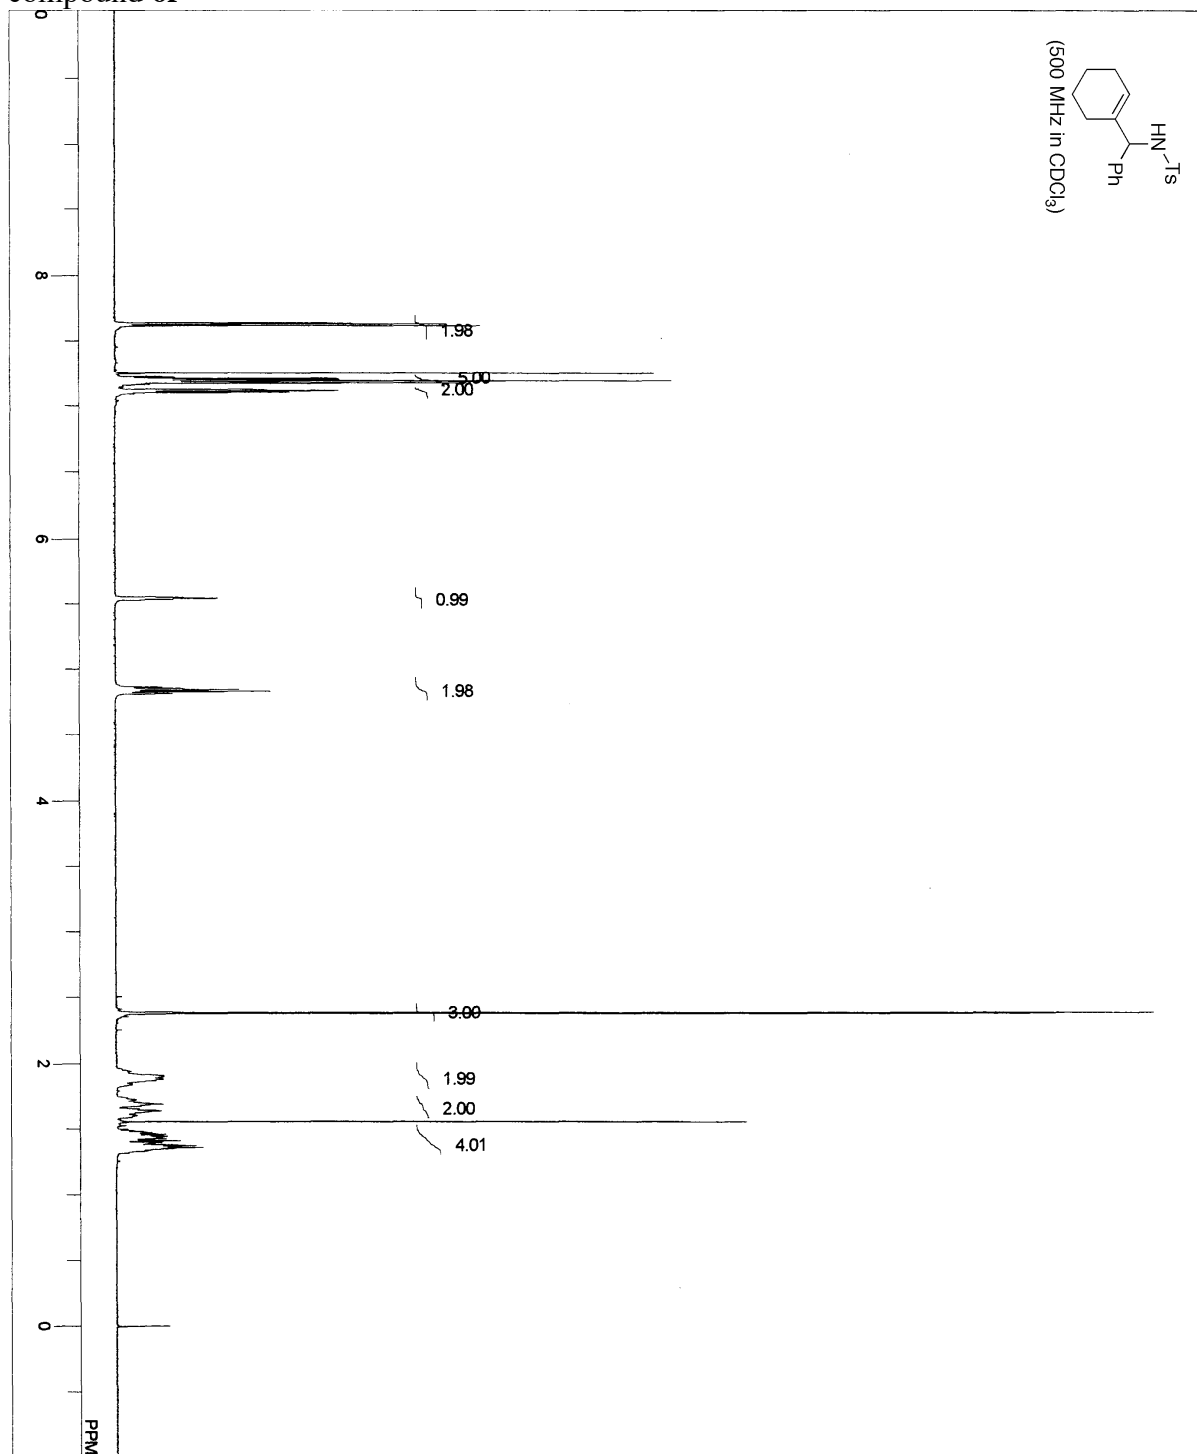

compound **6f**

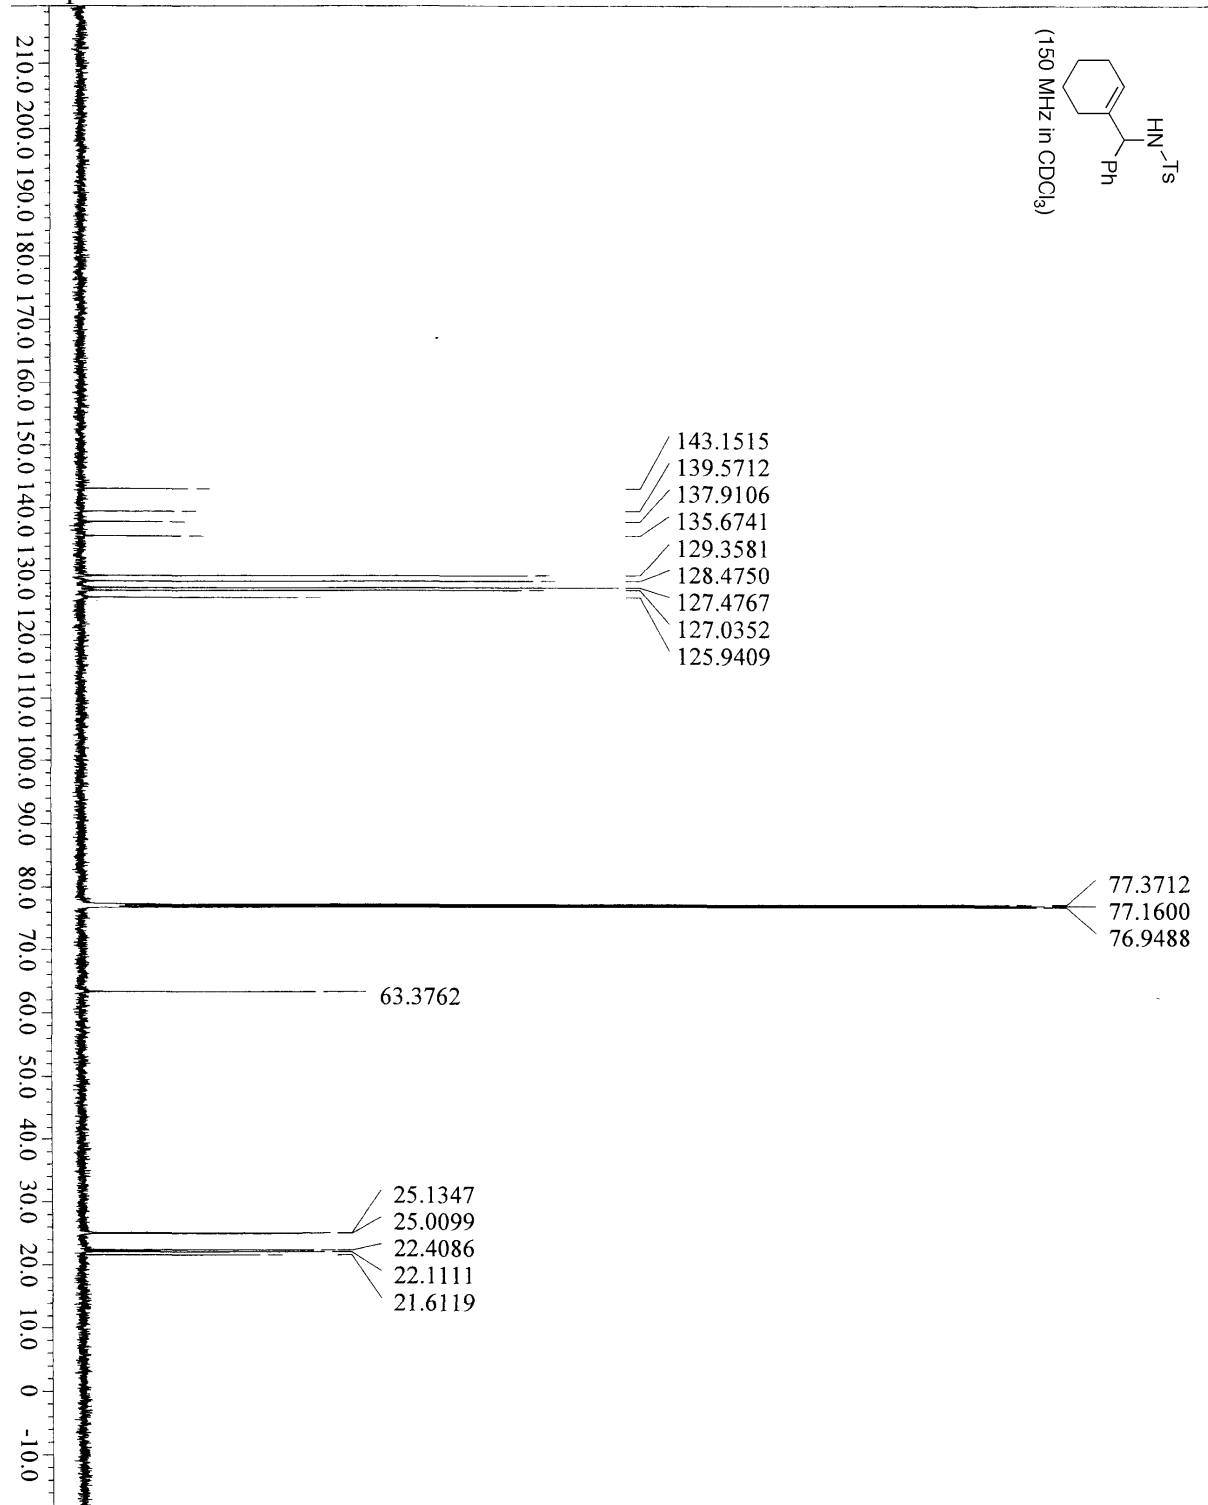

compound **6g**

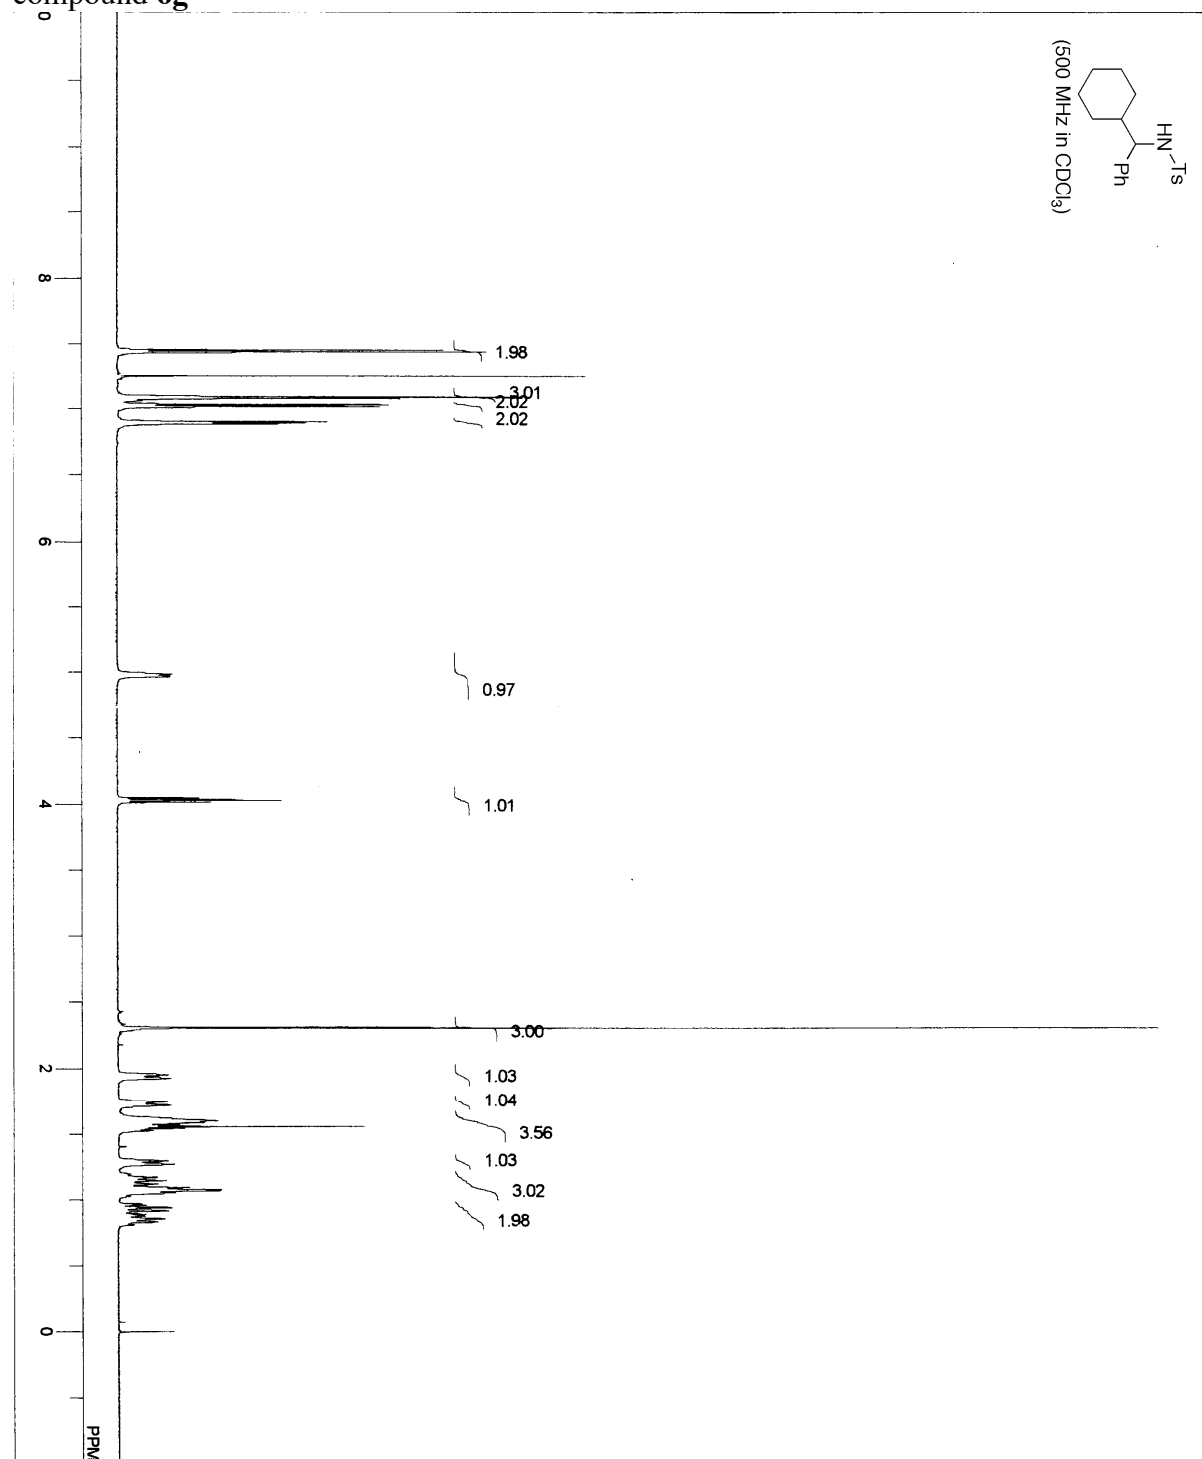

compound **6g**

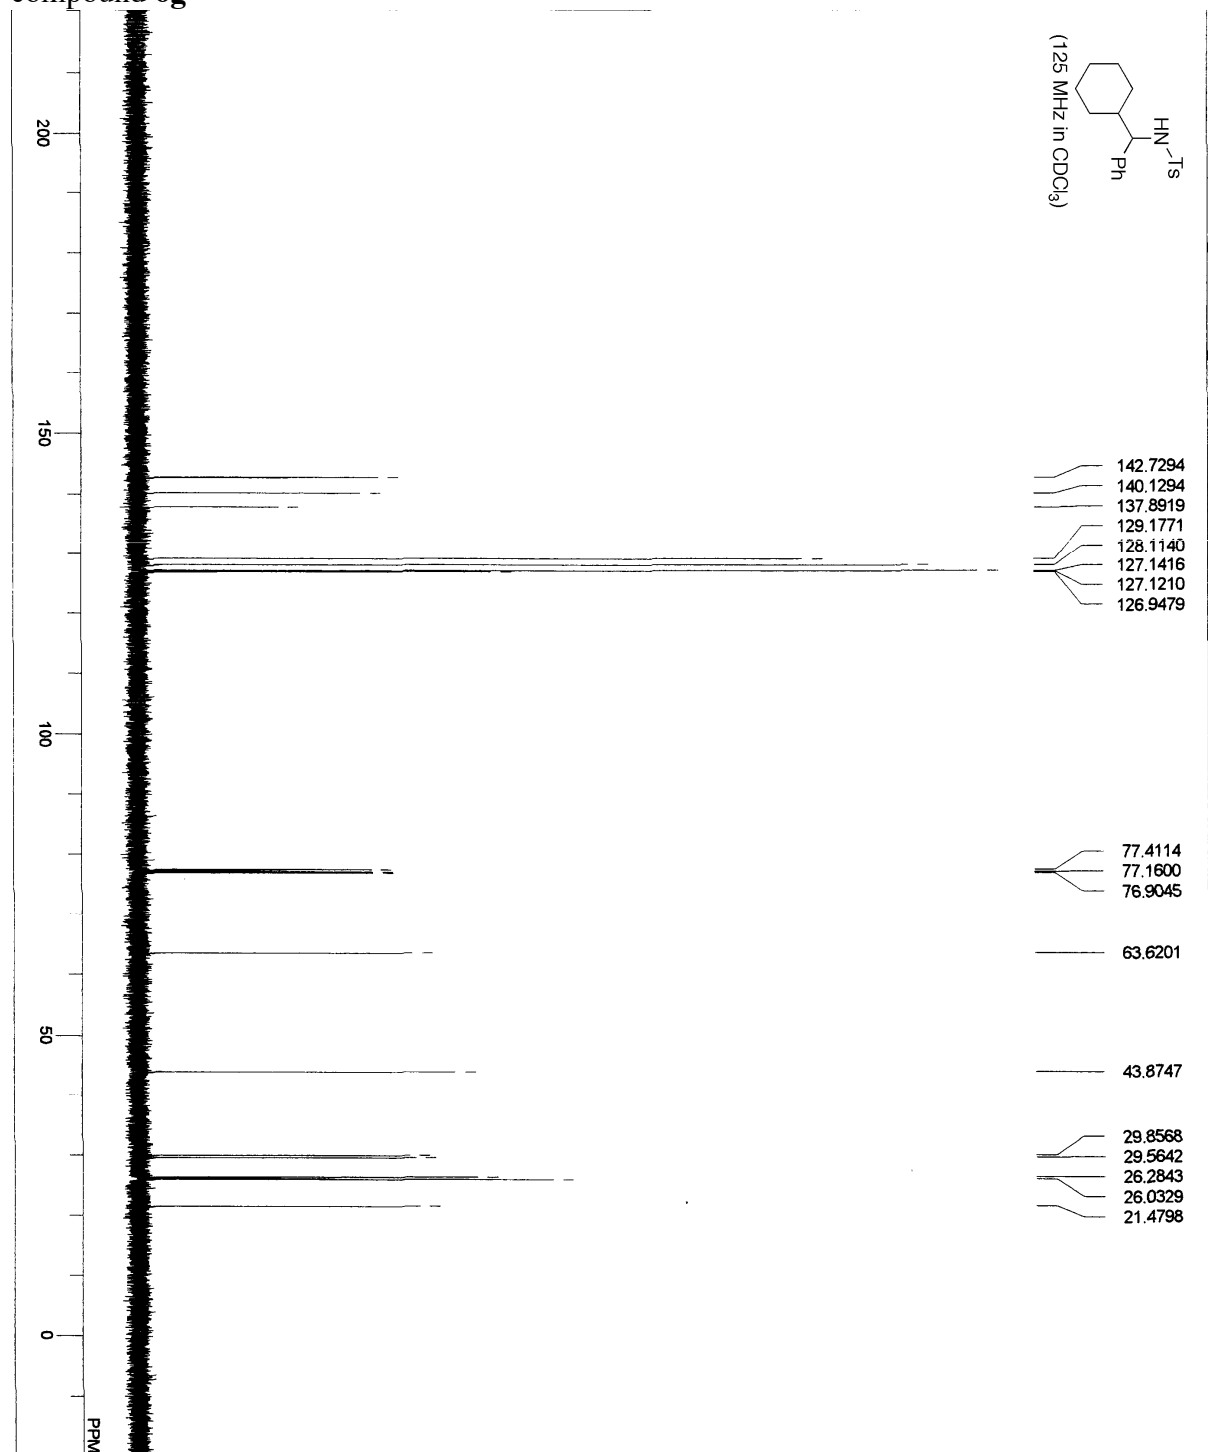

compound **6h**

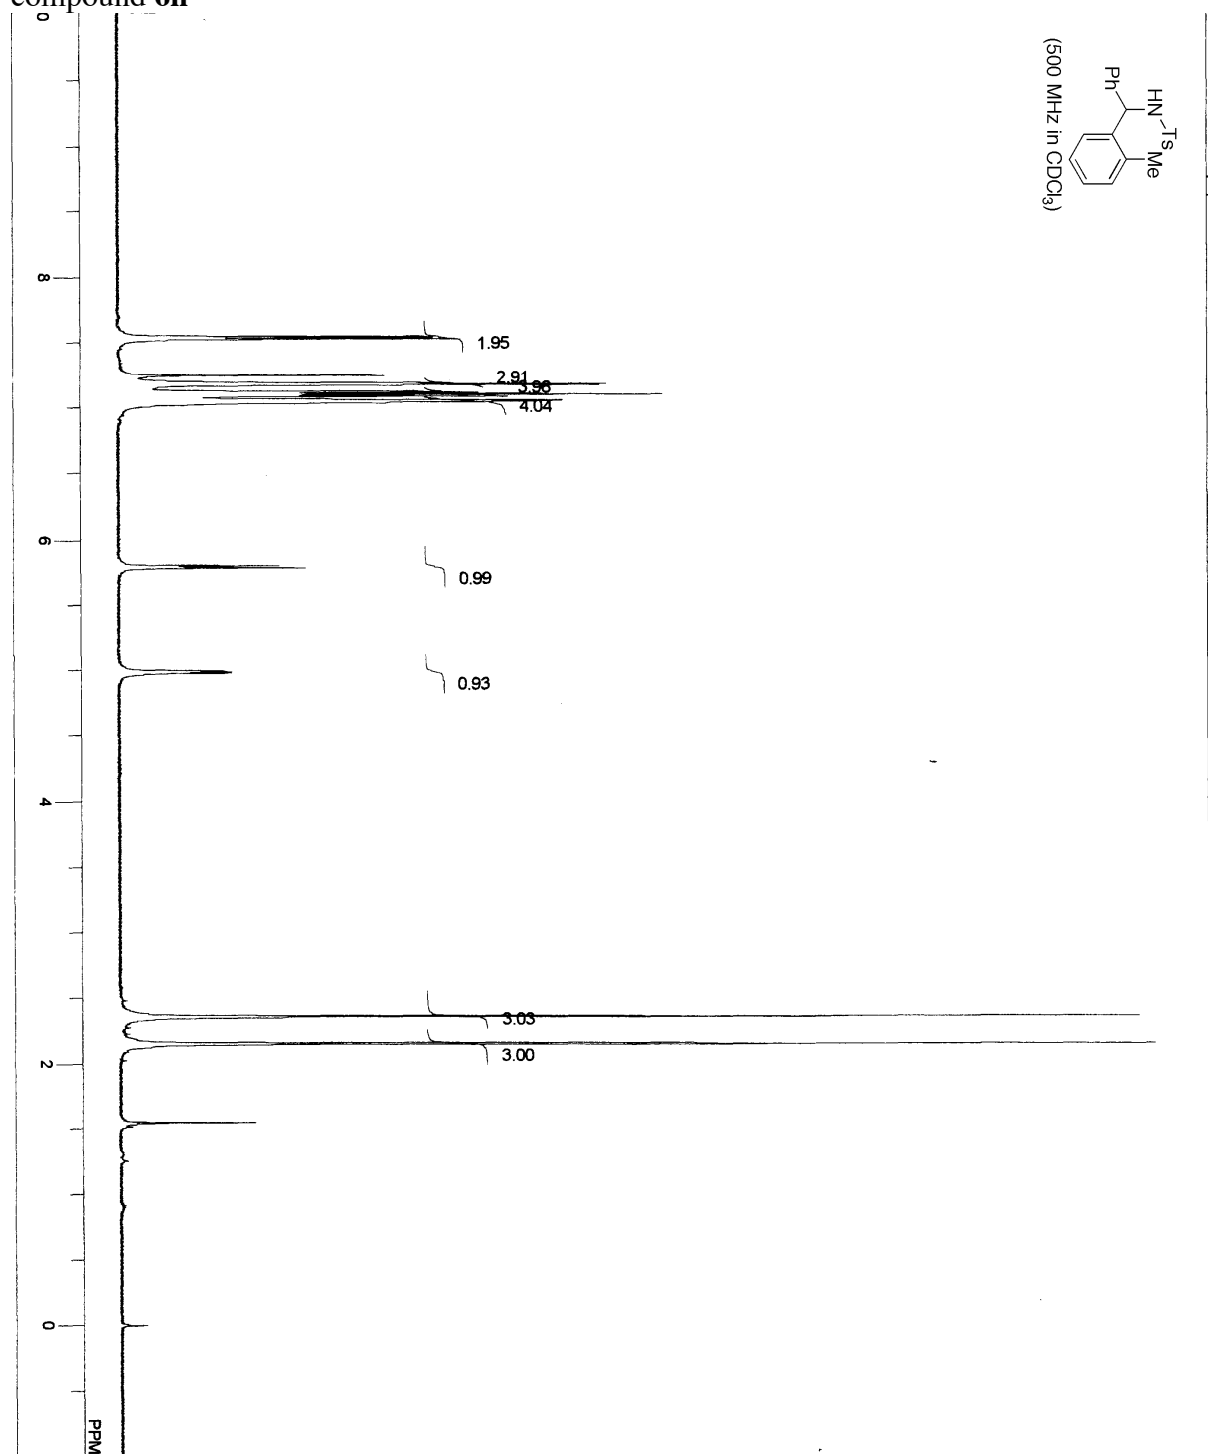



compound **6h**

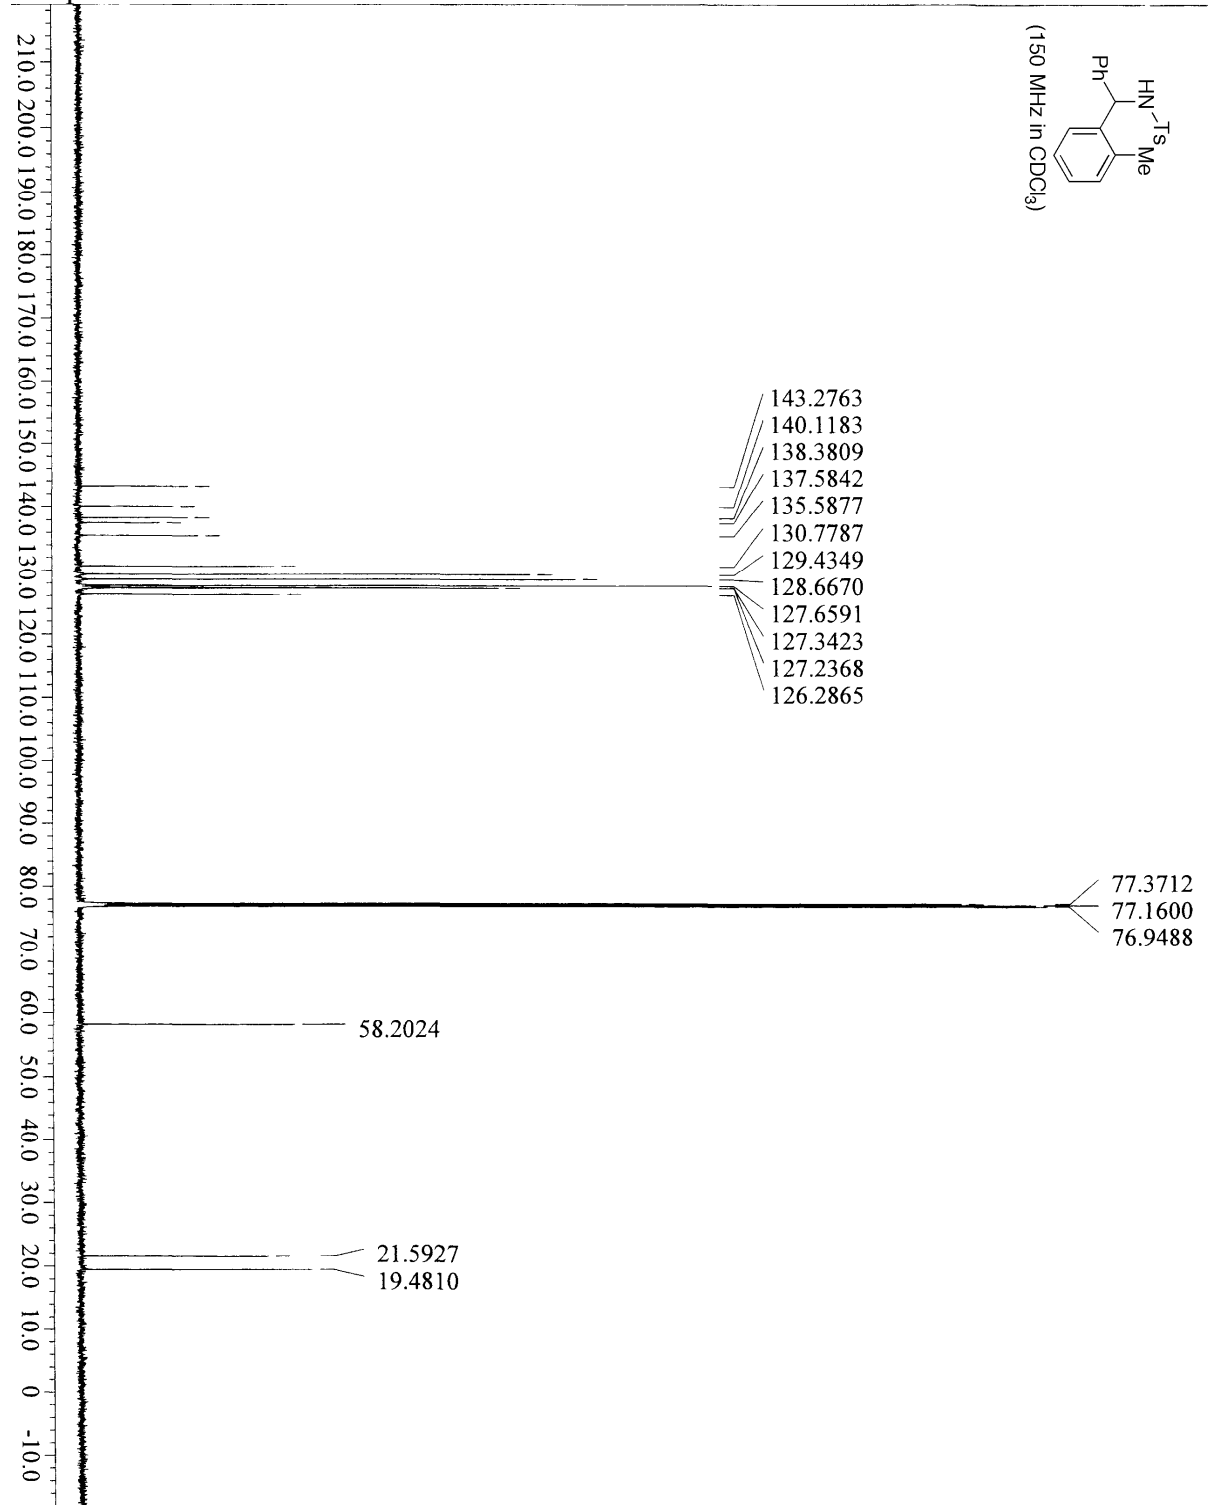

compound **6i**

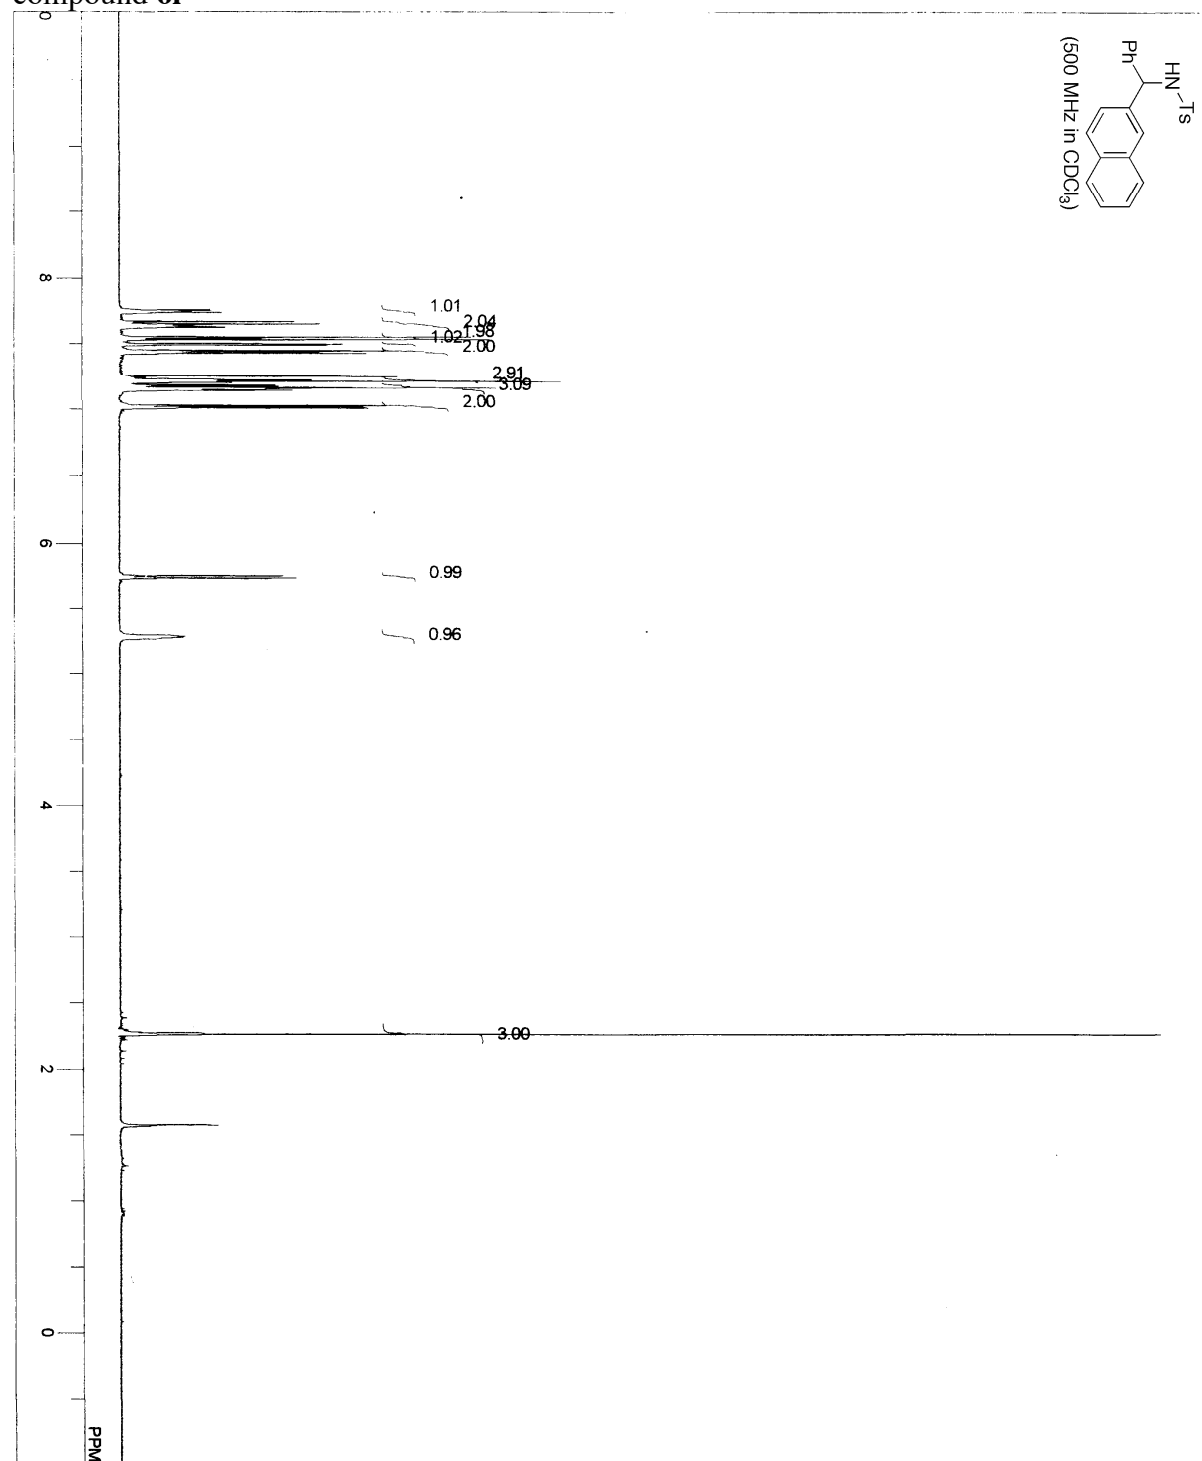

compound **6i**

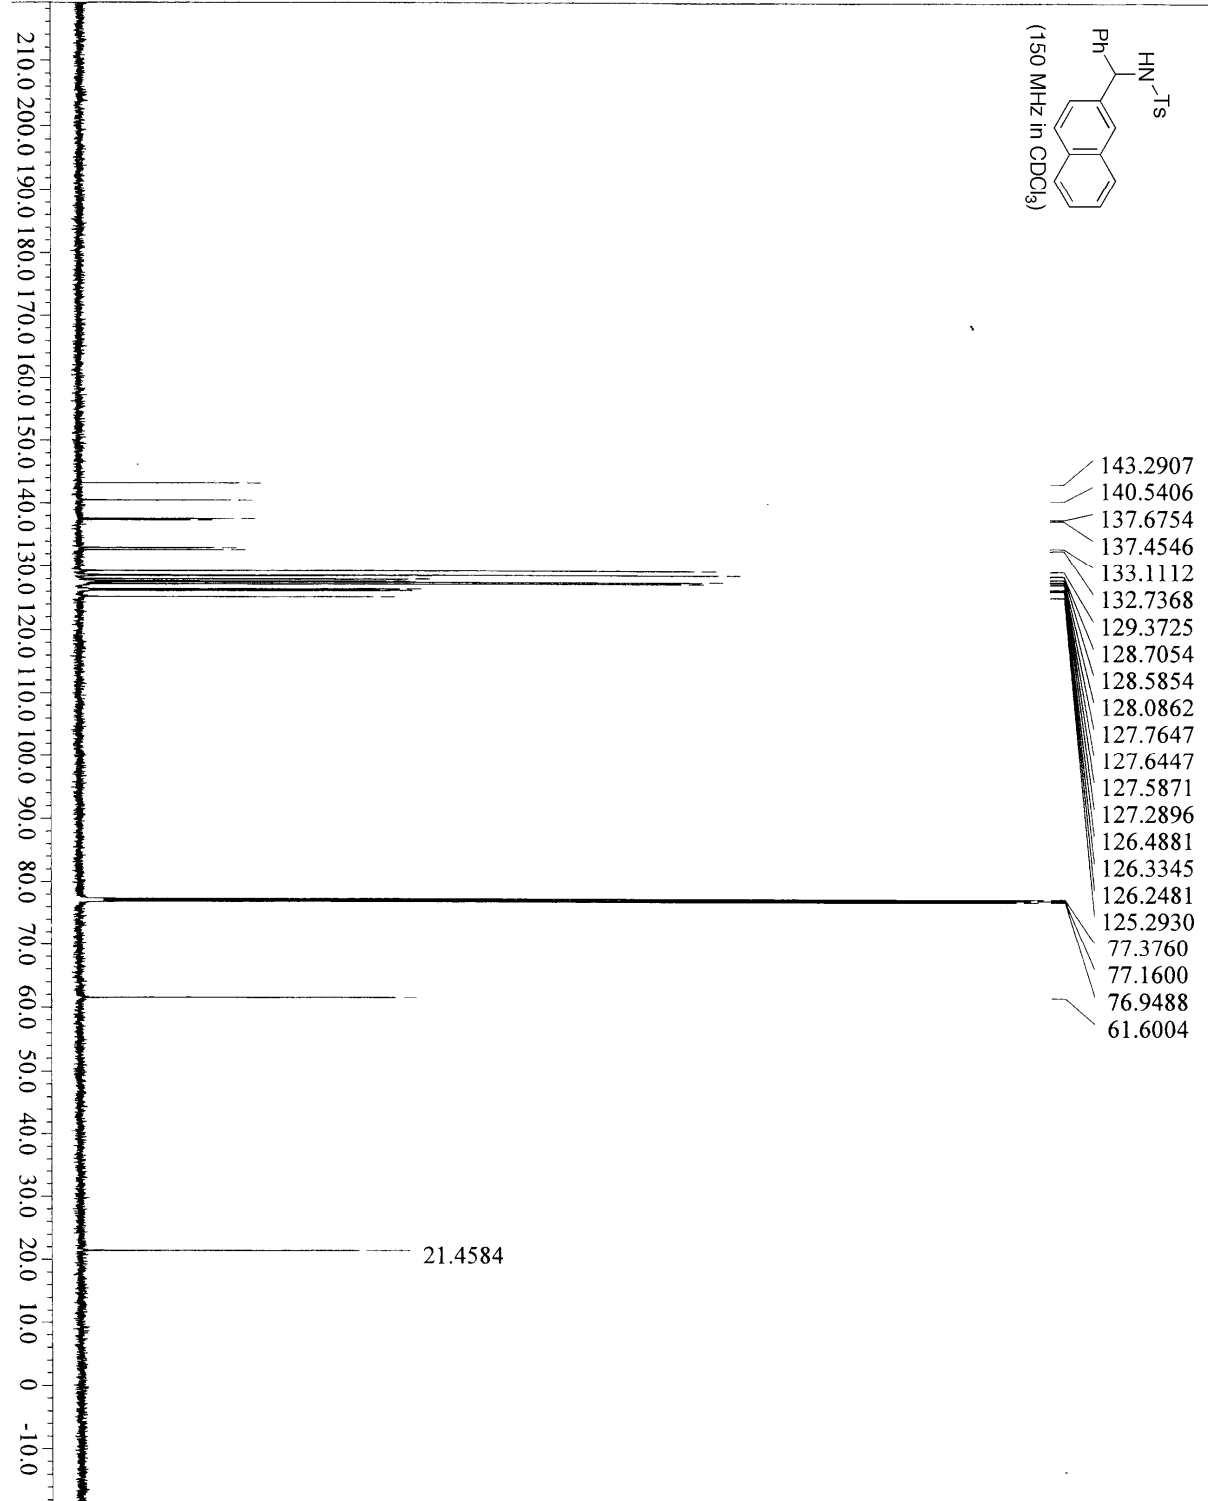

compound **6j**

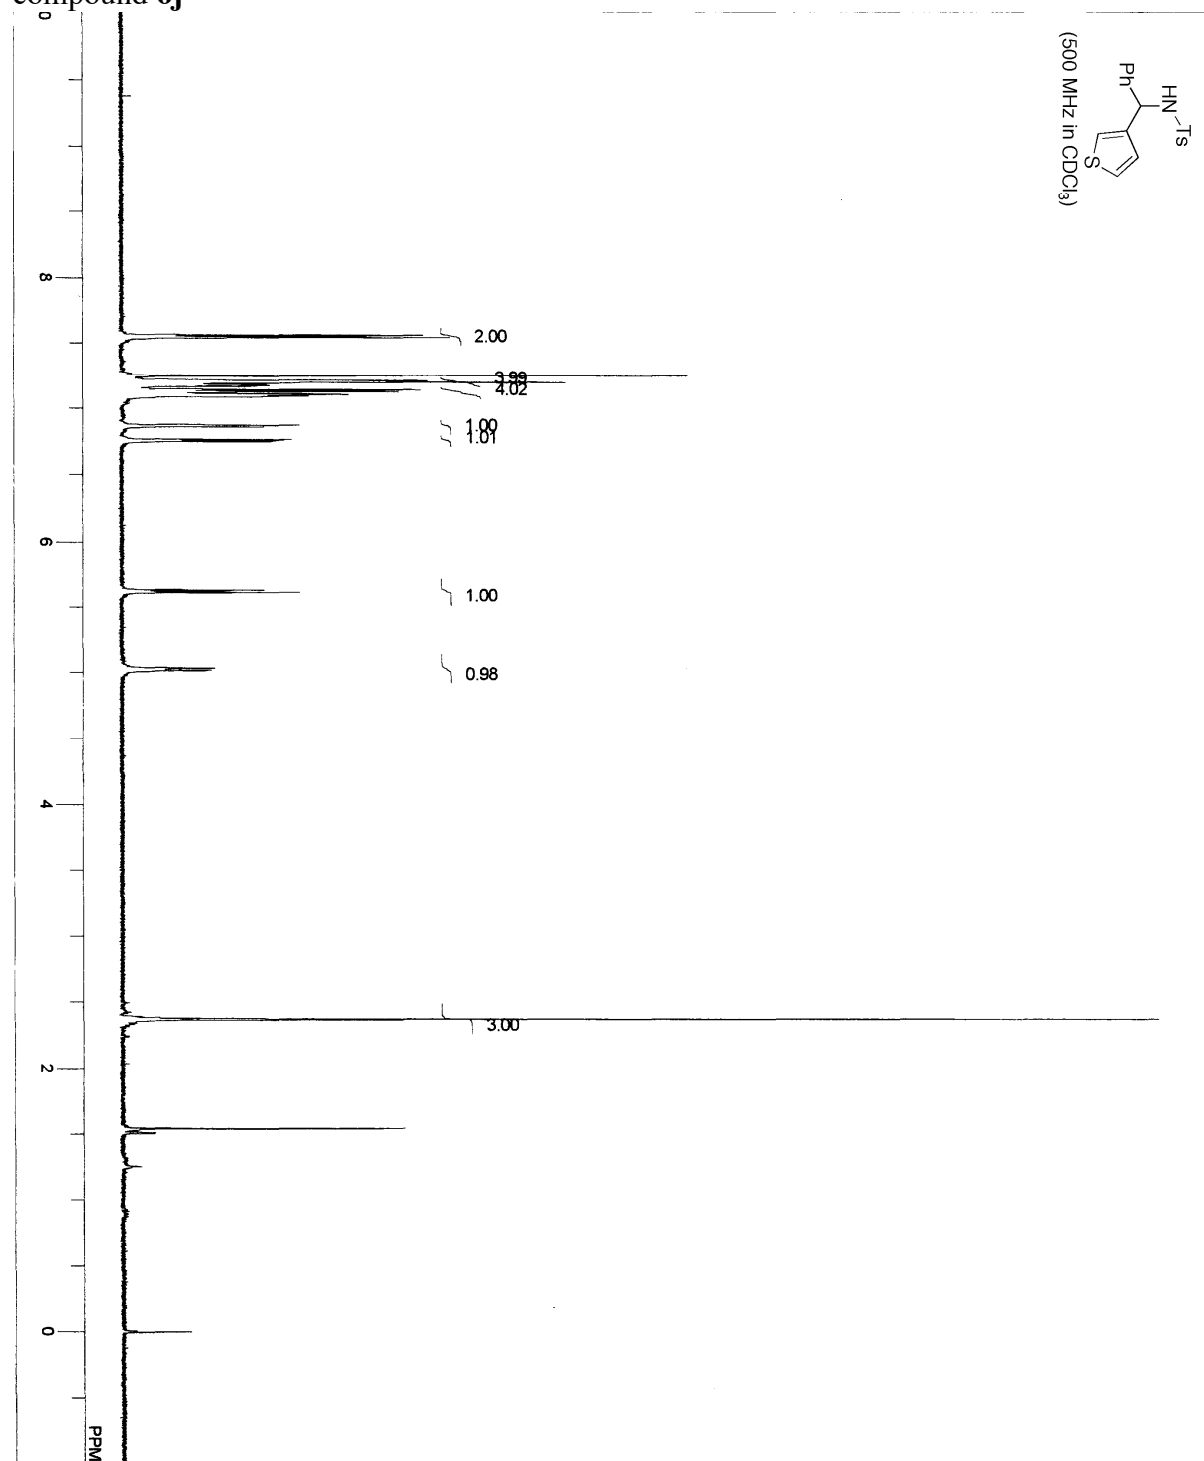

compound **6j**

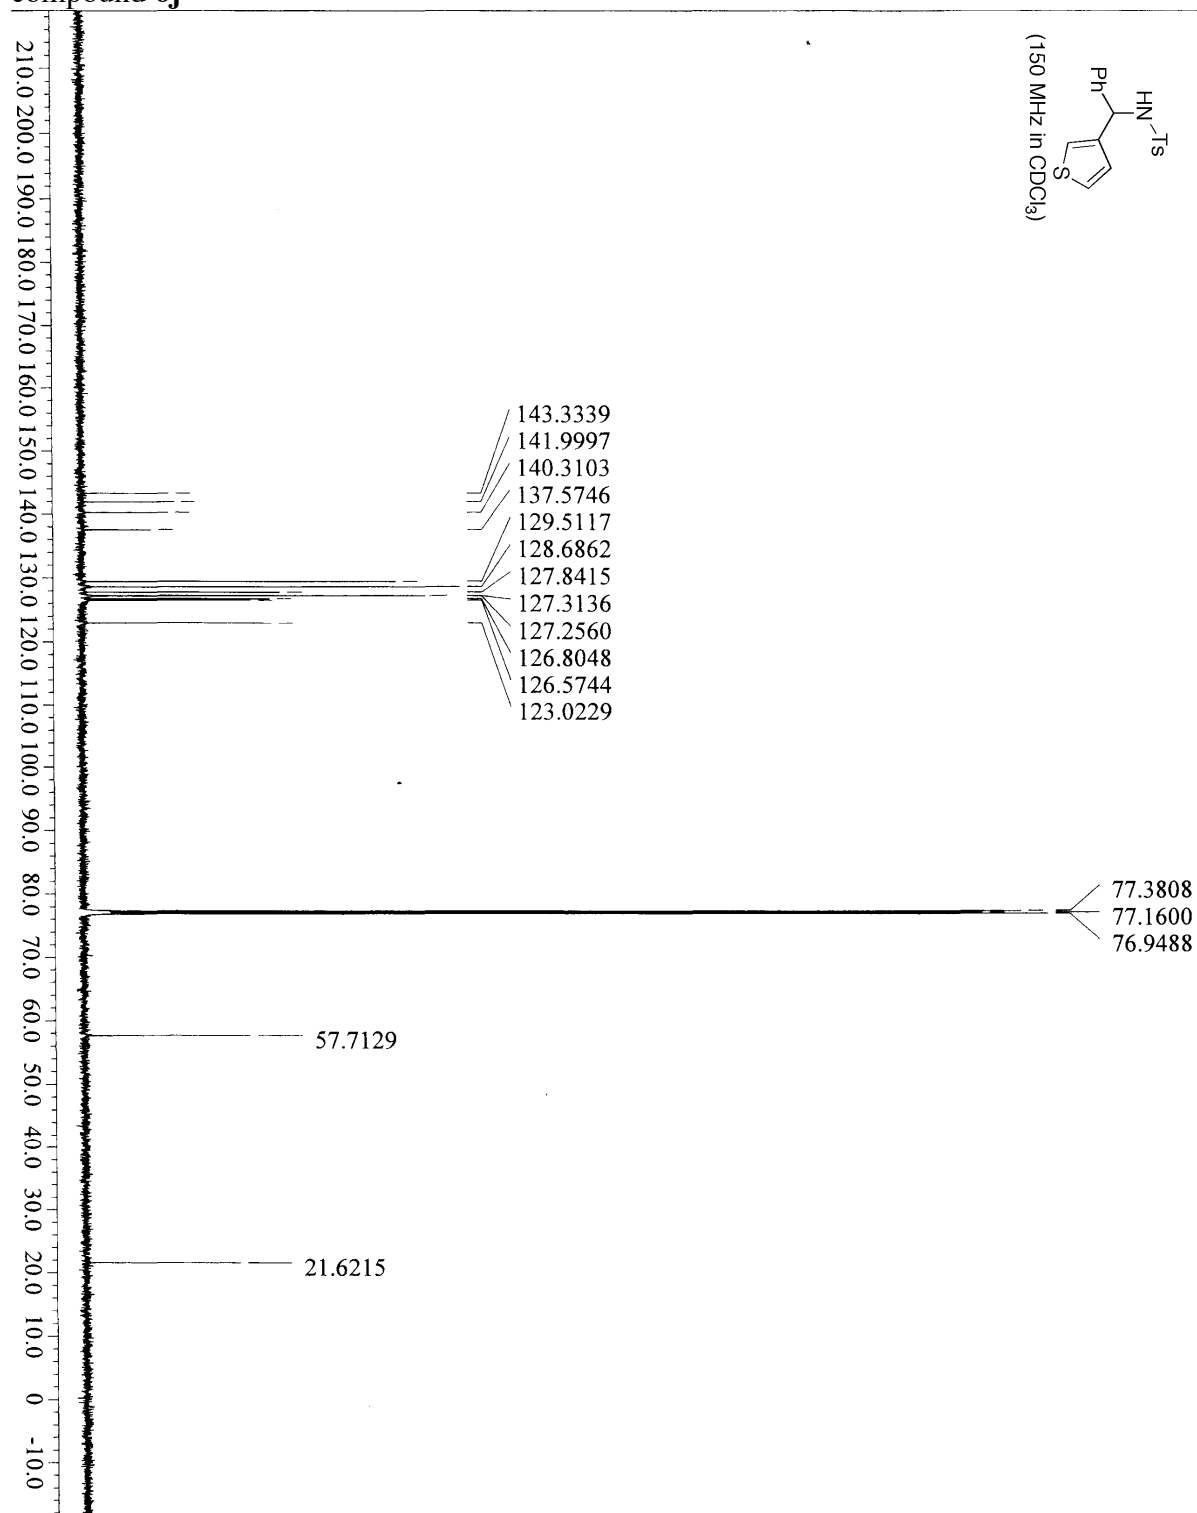

compound 6k

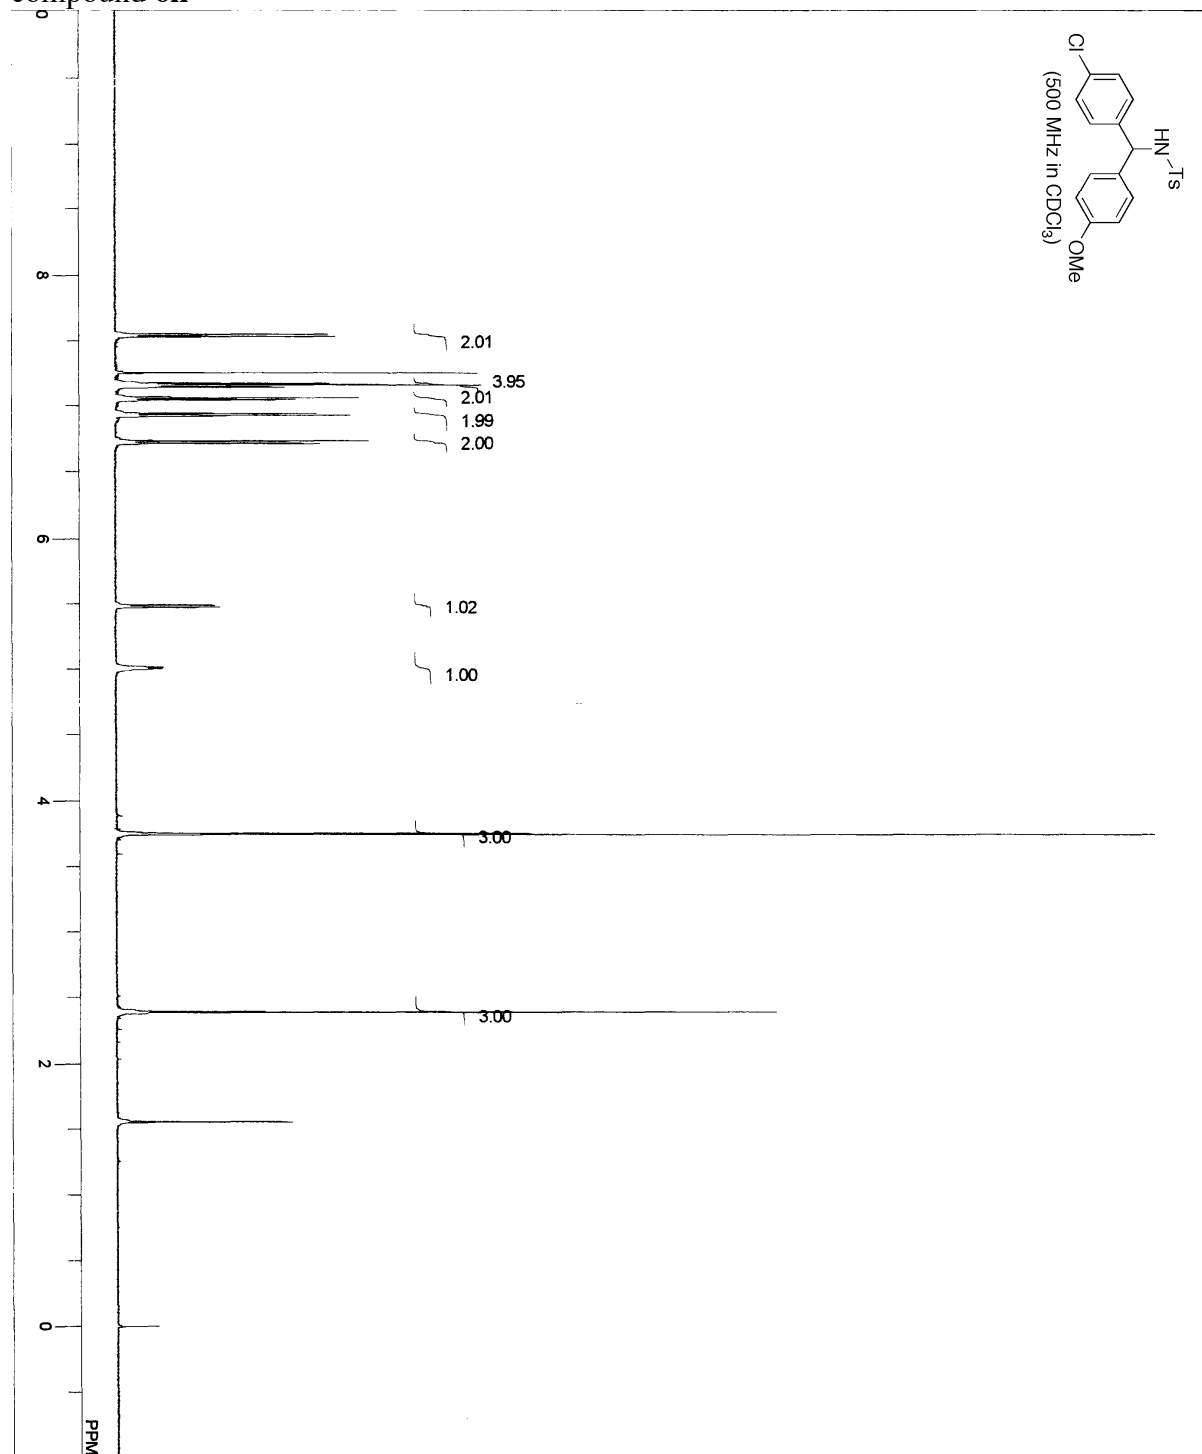

compound 6k

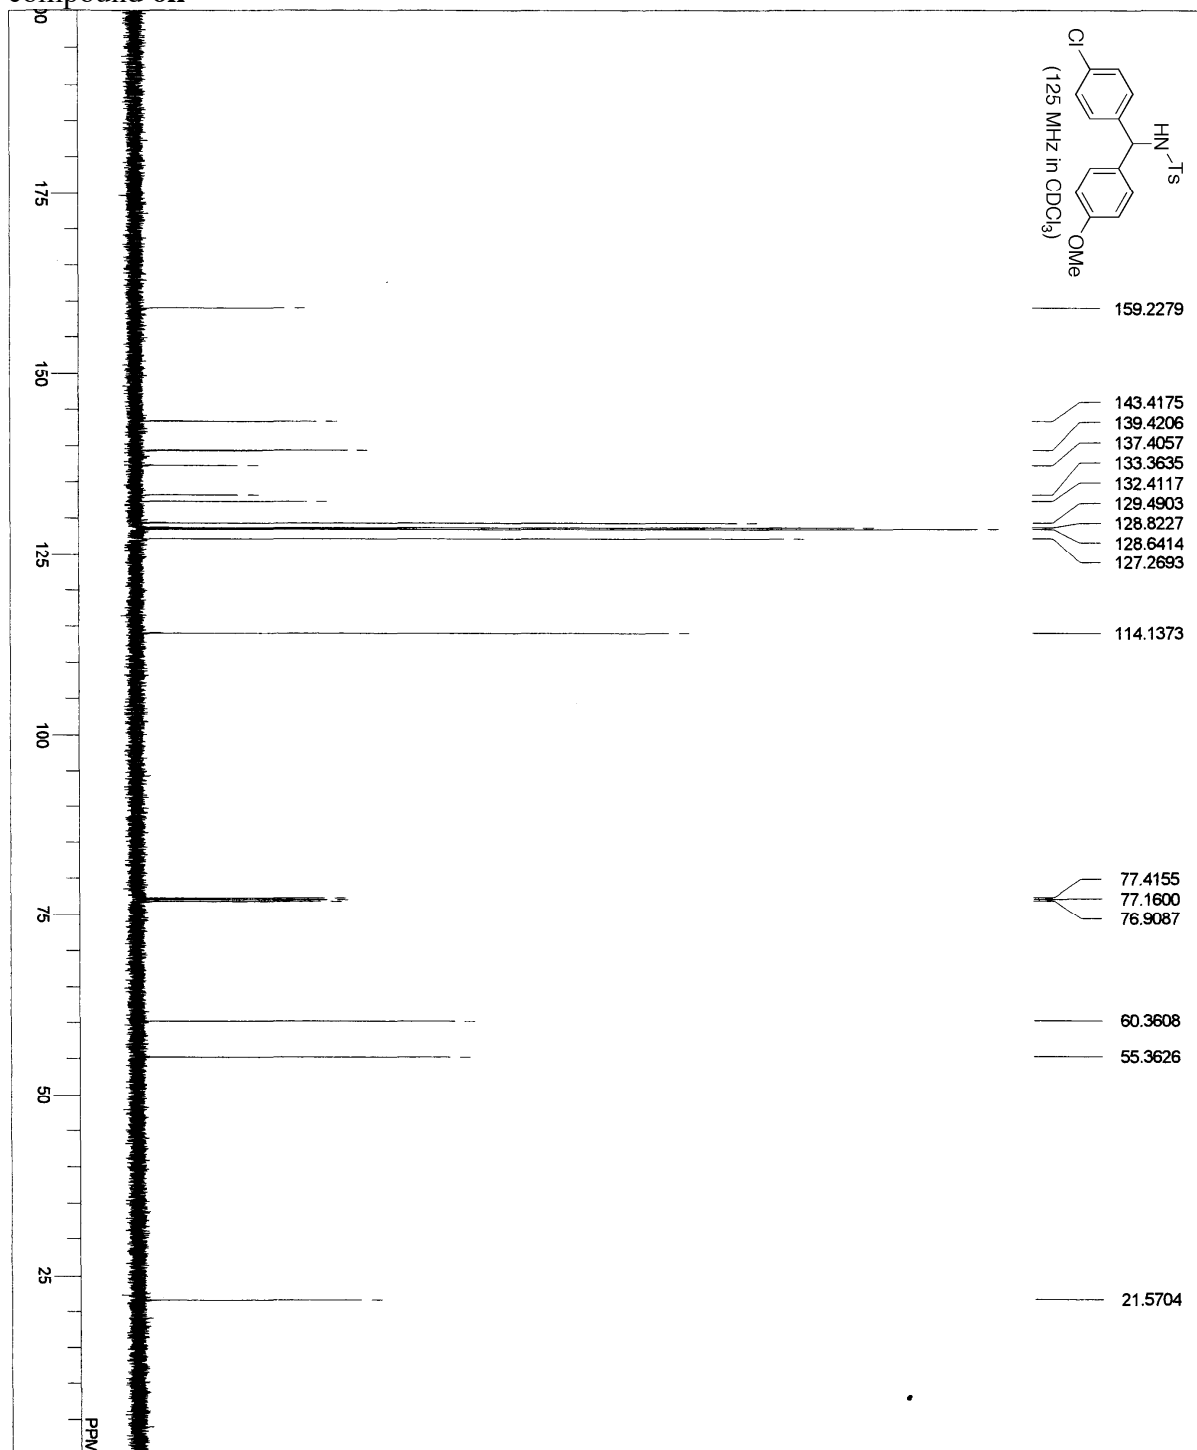

compound 9

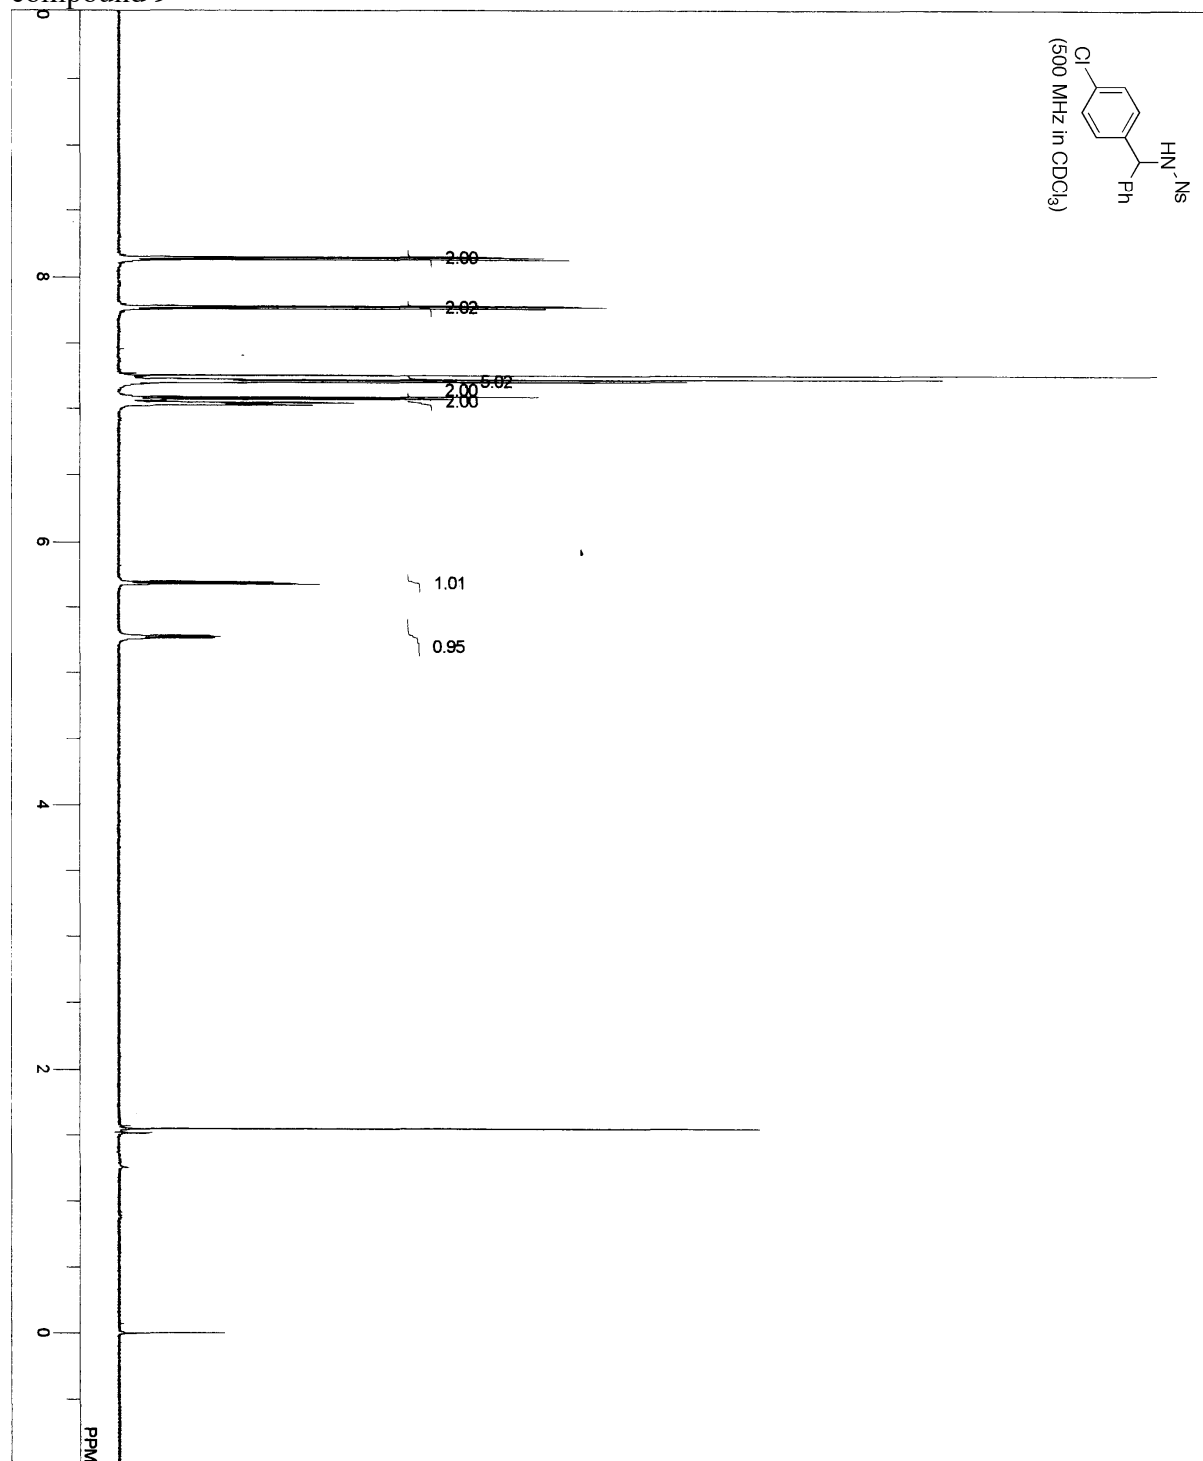



compound 9

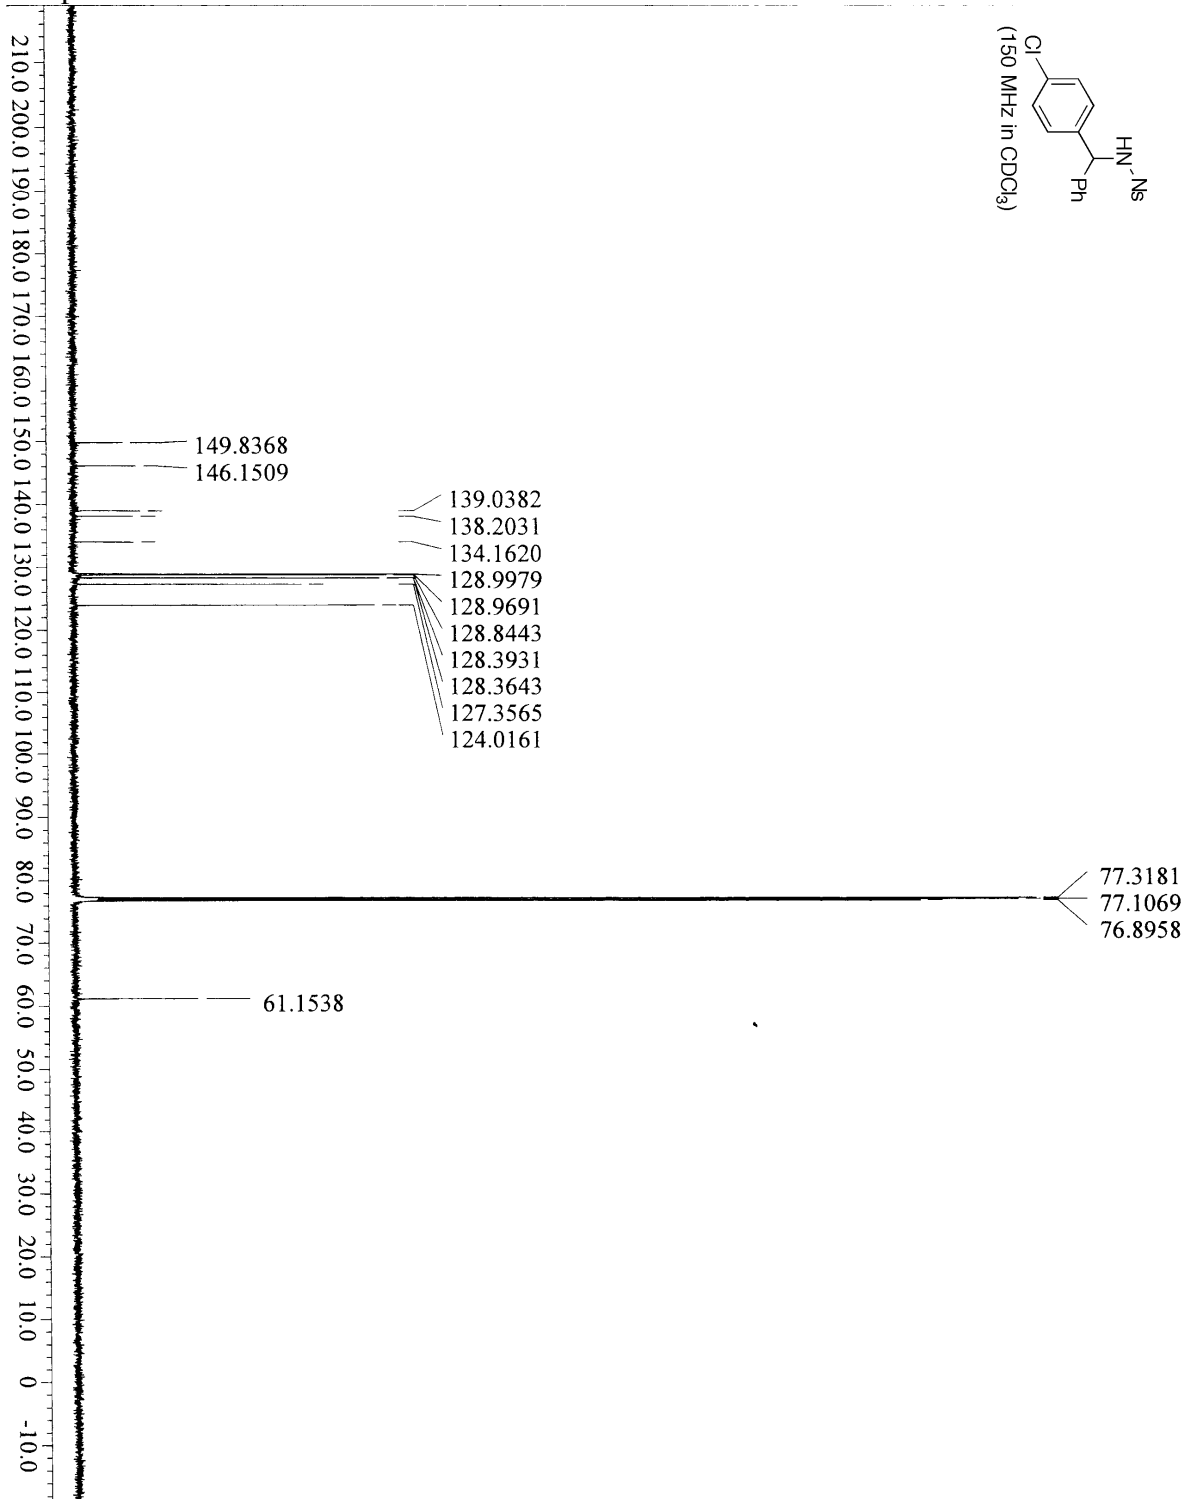

Supplement: c1cc11823d.pdf [file c1cc11823d.pdf]
